# Supplementary material for: A drilling wellbore pressure calculation model considering the effect of gas dissolution and suspension
Source: Frontiers journal article supplement (doi:10.3389/feart.2022.993876), 2022-09-27
Supplement: Data_Sheet_1.xlsx [file Data_Sheet_1.xlsx]

## Sheet: 不考虑气体溶解悬浮
	4.5min	1m3										8min	2m3										11.5min	3m3										14.5min	4m3										17min	5m3
密度	井深m	环空压耗	环空压力	泥浆流速m/s	平均密度	实际气速	自由气VF	溶解气wc	气体密度	气体体积	气体质量	井深m	环空压耗	环空压力	泥浆流速m/s	平均密度	实际气速	自由气VF	溶解气wc	气体密度	气体体积	气体质量	井深m	环空压耗	环空压力	泥浆流速m/s	平均密度	实际气速	自由气VF	溶解气wc	气体密度			井深m	环空压耗	环空压力	泥浆流速m/s	平均密度	实际气速	自由气VF	溶解气wc	气体密度			井深m	环空压耗	环空压力	泥浆流速m/s	平均密度
	0	0.541	0	0.179	1300	0	0	0	0.68051			0	0.547	0	0.182	1300	0	0	0	0.68051			0	0.555	0	0.185	1300	0	0	0	0.68051			0	0.564	0	0.189	1300	0	0	0	0.68051			0	0.571	0	0.192	1300
	50	0.541	0.637	0.179	1300	0	0	0	5.0864			50	0.547	0.637	0.182	1300	0	0	0	5.0864			50	0.555	0.637	0.185	1300	0	0	0	5.0864			50	0.563	0.637	0.189	1300	0	0	0	5.0864			50	0.571	0.637	0.192	1300
	100	0.541	1.274	0.179	1300	0	0	0	9.6243			100	0.547	1.274	0.182	1300	0	0	0	9.6243			100	0.555	1.274	0.185	1300	0	0	0	9.6243			100	0.563	1.274	0.189	1300	0	0	0	9.6243			100	0.571	1.274	0.192	1300
	150	0.541	1.912	0.179	1300	0	0	0	14.301			150	0.547	1.912	0.182	1300	0	0	0	14.301			150	0.555	1.912	0.185	1300	0	0	0	14.301			150	0.563	1.912	0.189	1300	0	0	0	14.301			150	0.571	1.912	0.192	1300
	200	0.54	2.549	0.179	1300	0	0	0	19.148			200	0.547	2.549	0.182	1300	0	0	0	19.148			200	0.555	2.549	0.185	1300	0	0	0	19.148			200	0.563	2.549	0.189	1300	0	0	0	19.148			200	0.571	2.549	0.192	1300
	250	0.54	3.186	0.179	1300	0	0	0	24.162			250	0.547	3.186	0.182	1300	0	0	0	24.162			250	0.555	3.186	0.185	1300	0	0	0	24.162			250	0.563	3.186	0.189	1300	0	0	0	24.162			250	0.571	3.186	0.192	1300
	300	0.54	3.823	0.179	1300	0	0	0	29.34			300	0.546	3.823	0.182	1300	0	0	0	29.34			300	0.554	3.823	0.185	1300	0	0	0	29.34			300	0.563	3.823	0.189	1300	0	0	0	29.34			300	0.57	3.823	0.192	1300
	350	0.54	4.46	0.179	1300	0	0	0	34.714			350	0.546	4.46	0.182	1300	0	0	0	34.714			350	0.554	4.46	0.185	1300	0	0	0	34.714			350	0.562	4.46	0.189	1300	0	0	0	34.723			350	0.57	4.46	0.192	1300
	400	0.54	5.097	0.179	1300	0	0	0	40.241			400	0.546	5.097	0.182	1300	0	0	0	40.25			400	0.554	5.097	0.185	1300	0	0	0	40.25			400	0.562	5.097	0.189	1300	0	0	0	40.25			400	0.57	5.097	0.192	1300
	450	0.54	5.734	0.179	1300	0	0	0	45.951			450	0.546	5.735	0.182	1300	0	0	0	45.951			450	0.554	5.735	0.185	1300	0	0	0	45.951			450	0.562	5.735	0.189	1300	0	0	0	45.951			450	0.57	5.735	0.192	1300
	500	0.54	6.372	0.179	1300	0	0	0	51.869			500	0.546	6.372	0.182	1300	0	0	0	51.869			500	0.554	6.372	0.185	1300	0	0	0	51.869			500	0.562	6.372	0.189	1300	0	0	0	51.869			500	0.57	6.372	0.192	1300
	550	0.539	7.009	0.179	1300	0	0	0	57.895			550	0.546	7.009	0.182	1300	0	0	0	57.895			550	0.554	7.009	0.185	1300	0	0	0	57.895			550	0.562	7.009	0.189	1300	0	0	0	57.895			550	0.57	7.009	0.192	1300
	600	0.539	7.646	0.179	1300	0	0	0	64.071			600	0.545	7.646	0.182	1300	0	0	0	64.071			600	0.553	7.646	0.185	1300	0	0	0	64.071			600	0.562	7.646	0.189	1300	0	0	0	64.071			600	0.569	7.646	0.192	1300
	650	0.539	8.283	0.179	1300	0	0	0	70.404			650	0.545	8.283	0.182	1300	0	0	0	70.404			650	0.553	8.283	0.185	1300	0	0	0	70.404			650	0.561	8.283	0.189	1300	0	0	0	70.404			650	0.569	8.283	0.192	1300
	700	0.539	8.92	0.179	1300	0	0	0	76.695			700	0.545	8.92	0.182	1300	0	0	0	76.695			700	0.553	8.92	0.185	1300	0	0	0	76.695			700	0.561	8.92	0.189	1300	0	0	0	76.695			700	0.569	8.92	0.192	1300
	750	0.539	9.557	0.179	1300	0	0	0	83.009			750	0.545	9.557	0.182	1300	0	0	0	83.009			750	0.553	9.558	0.185	1300	0	0	0	83.009			750	0.561	9.558	0.189	1300	0	0	0	83.009			750	0.569	9.558	0.192	1300
	800	0.539	10.195	0.179	1300	0	0	0	89.173			800	0.545	10.195	0.182	1300	0	0	0	89.173			800	0.553	10.195	0.185	1300	0	0	0	89.173			800	0.561	10.195	0.189	1300	0	0	0	89.173			800	0.569	10.195	0.192	1300
	850	0.538	10.832	0.179	1300	0	0	0	95.035			850	0.545	10.832	0.182	1300	0	0	0	95.035			850	0.553	10.832	0.185	1300	0	0	0	95.035			850	0.561	10.832	0.189	1300	0	0	0	95.035			850	0.569	10.832	0.192	1300
	900	0.538	11.469	0.179	1300	0	0	0	100.05			900	0.545	11.469	0.182	1300	0	0	0	100.05			900	0.552	11.469	0.185	1300	0	0	0	100.05			900	0.561	11.469	0.189	1300	0	0	0	100.05			900	0.568	11.469	0.192	1300
	950	0.538	12.106	0.179	1300	0	0	0	104.19			950	0.544	12.106	0.182	1300	0	0	0	104.19			950	0.552	12.106	0.185	1300	0	0	0	104.19			950	0.56	12.106	0.189	1300	0	0	0	104.19			950	0.568	12.106	0.192	1300
	1000	0.538	12.743	0.179	1300	0	0	0	107.16			1000	0.544	12.743	0.182	1300	0	0	0	107.16			1000	0.552	12.743	0.185	1300	0	0	0	107.16			1000	0.56	12.743	0.189	1300	0	0	0	107.16			1000	0.568	12.744	0.192	1299.99
	1050	0.53	13.388	1.201	1300	0	0	0	110.69			1050	0.536	13.388	1.219	1300	0	0	0	110.69			1050	0.544	13.389	1.24	1300	0	0	0	110.7			1050	0.551	13.389	1.263	1300	1.686	0	0	110.7			1050	0.559	13.389	1.286	1299.98
	1100	0.522	14.033	1.201	1300	0	0	0	115.83			1100	0.528	14.034	1.219	1300	0	0	0	115.84			1100	0.535	14.034	1.24	1300	0	0	0	115.84			1100	0.543	14.035	1.263	1300	1.685	0	0	115.84			1100	0.55	14.036	1.286	1299.98
	1150	0.514	14.679	1.201	1300	0	0	0	120.69			1150	0.519	14.679	1.219	1300	0	0	0	120.69			1150	0.526	14.68	1.24	1300	0	0	0	120.69			1150	0.534	14.681	1.263	1300	1.683	0	0	120.7			1150	0.541	14.682	1.286	1299.96
	1200	0.505	15.324	1.201	1300	0	0	0	125.48			1200	0.511	15.325	1.219	1300	0	0	0	125.48			1200	0.518	15.326	1.24	1300	0	0	0	125.49			1200	0.525	15.327	1.263	1300	1.682	0	0	125.49			1200	0.532	15.328	1.286	1299.94
	1250	0.497	15.969	1.201	1300	0	0	0	130.04			1250	0.502	15.97	1.219	1300	0	0	0	130.04			1250	0.509	15.971	1.24	1300	0	0	0	130.05			1250	0.516	15.973	1.263	1300	1.681	0	0	130.05			1250	0.523	15.974	1.286	1299.91
	1300	0.489	16.614	1.201	1300	0	0	0	134.53			1300	0.494	16.615	1.219	1300	0	0	0	134.54			1300	0.5	16.617	1.24	1300	0	0	0	134.54			1300	0.507	16.618	1.263	1300	1.68	0	0	134.55			1300	0.513	16.62	1.286	1299.86
	1350	0.481	17.259	1.201	1300	0	0	0	138.74			1350	0.486	17.261	1.219	1300	0	0	0	138.75			1350	0.492	17.263	1.24	1300	0	0	0	138.75			1350	0.498	17.264	1.263	1299.99	1.679	0	0	138.76			1350	0.504	17.266	1.286	1299.79
	1400	0.473	17.905	1.201	1300	0	0	0	142.79			1400	0.477	17.906	1.219	1300	0	0	0	142.8			1400	0.483	17.908	1.24	1300	0	0	0	142.8			1400	0.489	17.91	1.263	1299.99	1.677	0	0	142.81			1400	0.495	17.912	1.286	1299.69
	1450	0.464	18.55	1.201	1300	0	0	0	146.69			1450	0.469	18.552	1.219	1300	0	0	0	146.7			1450	0.475	18.554	1.24	1300	0	0	0	146.71			1450	0.48	18.556	1.263	1299.98	1.676	0	0	146.72			1450	0.486	18.558	1.286	1299.53
	1500	0.456	19.195	1.201	1300	0	0	0	150.44			1500	0.46	19.197	1.219	1300	0	0	0	150.45			1500	0.466	19.2	1.24	1300	1.648	0	0	150.46			1500	0.472	19.202	1.263	1299.96	1.675	0	0	150.47			1500	0.477	19.204	1.286	1299.31
	1550	0.448	19.84	1.201	1300	0	0	0	154.1			1550	0.452	19.842	1.219	1300	0	0	0	154.1			1550	0.457	19.845	1.24	1300	1.647	0	0	154.11			1550	0.463	19.848	1.263	1299.94	1.674	0	0	154.13			1550	0.468	19.85	1.285	1299
	1600	0.44	20.485	1.201	1300	0	0	0	157.61			1600	0.444	20.488	1.219	1300	0	0	0	157.62			1600	0.449	20.491	1.24	1300	1.646	0	0	157.63			1600	0.454	20.494	1.263	1299.9	1.673	0	0	157.64			1600	0.459	20.495	1.285	1298.56
	1650	0.432	21.131	1.201	1300	0	0	0	160.99			1650	0.435	21.133	1.219	1300	0	0	0	161			1650	0.44	21.137	1.24	1300	1.645	0	0	161.01			1650	0.445	21.14	1.263	1299.85	1.672	0	0	161.02			1650	0.449	21.141	1.285	1297.94
	1700	0.423	21.776	1.201	1300	0	0	0	164.24			1700	0.427	21.779	1.219	1300	0	0	0	164.25			1700	0.431	21.782	1.24	1300	1.644	0	0	164.26			1700	0.436	21.785	1.263	1299.76	1.671	0	0	164.27			1700	0.44	21.785	1.285	1297.09
	1750	0.415	22.421	1.201	1300	0	0	0	167.36			1750	0.419	22.424	1.219	1300	0	0	0	167.37			1750	0.423	22.428	1.24	1299.99	1.643	0	0	167.39			1750	0.427	22.431	1.263	1299.63	1.67	0	0	167.4			1750	0.431	22.43	1.284	1295.95
	1800	0.407	23.066	1.201	1300	0	0	0	170.28			1800	0.41	23.069	1.219	1300	0	0	0	170.28			1800	0.414	23.073	1.24	1299.99	1.642	0	0	170.29			1800	0.418	23.077	1.263	1299.44	1.669	0	0	170.31			1800	0.422	23.074	1.284	1294.42
	1850	0.399	23.711	1.201	1300	0	0	0	173.07			1850	0.402	23.715	1.219	1300	0	0	0	173.08			1850	0.406	23.719	1.24	1299.98	1.641	0	0	173.1			1850	0.409	23.722	1.262	1299.15	1.668	0	0	173.11			1850	0.413	23.717	1.283	1292.42
	1900	0.391	24.357	1.201	1300	0	0	0	175.76			1900	0.393	24.36	1.219	1300	0	0	0	175.77			1900	0.397	24.365	1.24	1299.97	1.64	0	0	175.79			1900	0.4	24.368	1.262	1298.73	1.667	0	0	175.8			1900	0.404	24.358	1.282	1289.99
	1950	0.383	25.002	1.201	1300	0	0	0	178.35			1950	0.385	25.006	1.219	1300	0	0	0	178.36			1950	0.388	25.01	1.24	1299.94	1.639	0	0	178.37			1950	0.392	25.013	1.262	1298.12	1.666	0	0	178.39			1950	0.395	24.999	1.28	1286.88
	2000	0.374	25.647	1.201	1300	0	0	0	180.84			2000	0.377	25.651	1.219	1300	0	0	0	180.85			2000	0.38	25.656	1.24	1299.91	1.638	0	0	180.87			2000	0.383	25.657	1.262	1297.27	1.665	0	0	180.88			2000	0.386	25.637	1.279	1283.15
	2050	0.366	26.292	1.201	1300	0	0	0	183.24			2050	0.368	26.296	1.219	1300	1.612	0	0	183.25			2050	0.371	26.301	1.24	1299.84	1.637	0	0	183.27			2050	0.374	26.302	1.261	1296.08	1.664	0	0	183.28			2050	0.377	26.274	1.277	1278.76
	2100	0.358	26.937	1.201	1300	0	0	0	185.65			2100	0.36	26.942	1.219	1300	1.611	0	0	185.66			2100	0.362	26.947	1.24	1299.74	1.636	0	0	185.68			2100	0.365	26.945	1.261	1294.45	1.663	0	0	185.69			2100	0.368	26.908	1.274	1273.68
	2150	0.35	27.583	1.201	1300	0	0	0	187.98			2150	0.351	27.587	1.219	1300	1.61	0	0	187.99			2150	0.354	27.592	1.24	1299.58	1.635	0	0	188			2150	0.356	27.588	1.26	1292.28	1.662	0	0	188.02			2150	0.359	27.54	1.272	1267.93
	2200	0.342	28.228	1.201	1300	0	0	0	190.22			2200	0.343	28.233	1.219	1300	1.609	0	0	190.23			2200	0.345	28.238	1.24	1299.34	1.635	0	0	190.24	0		2200	0.347	28.229	1.259	1289.62	1.661	0	0	190.26			2200	0.35	28.168	1.269	1261.59
	2250	0.333	28.873	1.201	1300	0	0	0	192.3			2250	0.335	28.878	1.219	1299.99	1.608	0	0	192.31			2250	0.337	28.883	1.24	1298.96	1.634	0	0	192.32	0		2250	0.339	28.869	1.257	1286.18	1.66	0	0	192.33			2250	0.341	28.794	1.266	1254.74
	2300	0.325	29.518	1.201	1300	0	0	0	194.39			2300	0.326	29.523	1.219	1299.99	1.607	0	0	194.41			2300	0.328	29.528	1.24	1298.38	1.633	0	0	194.42	0		2300	0.33	29.507	1.256	1282	1.659	0	0	194.43			2300	0.332	29.415	1.262	1247.55
	2350	0.317	30.164	1.201	1300	0	0	0	196.51			2350	0.318	30.169	1.219	1299.98	1.606	0	0	196.53			2350	0.319	30.173	1.239	1297.54	1.632	0	0	196.54	0		2350	0.321	30.143	1.253	1277.03	1.658	0	0	196.55			2350	0.324	30.034	1.258	1240.2
	2400	0.309	30.809	1.201	1300	0	0	0	198.48			2400	0.309	30.814	1.219	1299.96	1.605	0	0	198.49			2400	0.311	30.817	1.239	1296.31	1.631	0	0	198.51	0		2400	0.312	30.776	1.251	1271.28	1.657	0	0	198.52			2400	0.315	30.648	1.255	1232.91
	2450	0.301	31.454	1.201	1300	0	0	0	200.29			2450	0.301	31.46	1.219	1299.92	1.605	0	0	200.3			2450	0.302	31.46	1.238	1294.57	1.63	0	0	200.32	0		2450	0.304	31.406	1.248	1264.78	1.655	0	0	200.33			2450	0.307	31.259	1.251	1225.88
	2500	0.292	32.099	1.201	1300	0	0	0	202.14			2500	0.293	32.105	1.219	1299.86	1.604	0	0	202.15			2500	0.294	32.102	1.237	1292.29	1.629	0	0	202.17	0		2500	0.295	32.032	1.245	1257.65	1.654	0	0	202.18			2500	0.298	31.866	1.247	1219.32
	2550	0.284	32.744	1.201	1300	1.581	0	0	204.01			2550	0.284	32.75	1.219	1299.76	1.603	0	0	204.02			2550	0.285	32.743	1.236	1289.18	1.628	0	0	204.04	0		2550	0.287	32.655	1.241	1250.06	1.653	0.0001	0	204.05	0.000141878	0.0289502	2550	0.29	32.471	1.244	1213.41
	2600	0.276	33.389	1.201	1300	1.58	0	0	205.83			2600	0.276	33.395	1.219	1299.57	1.602	0	0	205.84			2600	0.276	33.383	1.235	1285.23	1.627	0	0	205.86	0		2600	0.278	33.274	1.238	1242.25	1.651	0.00312	0	205.88	0.0044266	0.911348	2600	0.281	33.072	1.241	1208.27
	2650	0.268	34.035	1.201	1300	1.579	0	0	207.6			2650	0.268	34.041	1.219	1299.27	1.601	0	0	207.61	0		2650	0.268	34.02	1.233	1280.34	1.626	0	0	207.63	0		2650	0.27	33.889	1.234	1234.48	1.65	0.0806003	0	207.65	0.114354	23.7456	2650	0.273	33.671	1.238	1203.94
	2700	0.26	34.68	1.201	1300	1.578	0	0	209.32			2700	0.259	34.685	1.218	1298.78	1.6	0	0	209.33	0		2700	0.259	34.654	1.23	1274.45	1.625	0	0	209.35	0		2700	0.261	34.5	1.23	1227.04	1.648	0.109704	0	209.36	0.155646	32.5861	2700	0.264	34.269	1.235	1200.42
	2750	0.252	35.325	1.201	1300	1.578	0	0	210.99			2750	0.251	35.33	1.218	1297.99	1.599	0	0	211.01	0		2750	0.251	35.285	1.227	1267.6	1.624	0.0001	0	211.02	0.000141878		2750	0.253	35.108	1.227	1220.19	1.646	0.108831	0	211.04	0.154407	32.5861	2750	0.256	34.864	1.233	1197.51
	2800	0.243	35.97	1.201	1299.99	1.577	0	0	212.62			2800	0.242	35.974	1.218	1296.77	1.599	0	0	212.63	0		2800	0.243	35.913	1.224	1259.9	1.623	0.0003	0	212.65	0.000425634		2800	0.245	35.713	1.224	1214.13	1.645	0.108002	0	212.66	0.153231	32.5861	2800	0.248	35.459	1.231	1195.29
	2850	0.235	36.615	1.201	1299.98	1.576	0	0	214.2			2850	0.234	36.617	1.217	1294.9	1.598	0	0	214.21	0		2850	0.234	36.537	1.221	1251.58	1.622	0.004	0	214.23	0.00567512	1.21578	2850	0.237	36.314	1.221	1209.01	1.643	0.1072	0	214.25	0.152094	32.5861	2850	0.24	36.052	1.23	1193.53
	2900	0.227	37.26	1.201	1299.95	1.575	0	0	215.83			2900	0.226	37.26	1.216	1292.35	1.597	0	0	215.84	0		2900	0.226	37.156	1.217	1242.96	1.62	0.0444583	0	215.86	0.0630765	13.6157	2900	0.229	36.914	1.218	1204.85	1.641	0.106396	0	215.87	0.150952	32.5861	2900	0.231	36.645	1.228	1192.12
	2950	0.219	37.906	1.201	1299.91	1.574	0	0	217.33			2950	0.217	37.9	1.215	1288.7	1.596	0	0	217.34	0		2950	0.218	37.771	1.213	1234.44	1.619	0.0999653	0	217.36	0.141829	30.8279	2950	0.22	37.511	1.216	1201.61	1.639	0.105662	0	217.37	0.149911	32.5861	2950	0.223	37.236	1.227	1190.95
	3000	0.211	38.551	1.2	1299.81	1.573	0	0	218.87			3000	0.209	38.539	1.213	1283.85	1.595	0	0	218.88	0		3000	0.21	38.382	1.209	1226.41	1.617	0.100037	0	218.9	0.141931	31.0686	3000	0.212	38.107	1.214	1199	1.637	0.104918	0	218.91	0.148856	32.5861	3000	0.215	37.828	1.226	1189.93
	3050	0.202	39.196	1.2	1299.63	1.572	0	0	220.54			3050	0.201	39.175	1.211	1277.63	1.594	0	0	220.55	0		3050	0.202	38.989	1.206	1219.25	1.616	0.0992797	0	220.57	0.140856	31.0686	3050	0.204	38.702	1.213	1197.09	1.636	0.104124	0	220.58	0.147729	32.5861	3050	0.207	38.419	1.224	1188.99
	3100	0.194	39.841	1.2	1299.28	1.571	0	0	222.17			3100	0.193	39.807	1.208	1270.01	1.593	0.0001	0	222.18	0.000141878		3100	0.194	39.593	1.203	1213.21	1.614	0.0985514	0	222.2	0.139823	31.0686	3100	0.196	39.297	1.211	1195.59	1.634	0.10336	0	222.21	0.146645	32.5861	3100	0.199	39.009	1.223	1188.09
	3150	0.186	40.485	1.2	1298.65	1.57	0	0	223.76			3150	0.184	40.436	1.204	1261.11	1.592	0.002	0	223.77	0.00283756		3150	0.186	40.194	1.2	1208.41	1.612	0.097858	0	223.79	0.138839	31.0708	3150	0.188	39.89	1.21	1194.38	1.632	0.10263	0	223.79	0.14561	32.5861	3150	0.191	39.599	1.222	1187.19
	3200	0.178	41.13	1.2	1297.53	1.569	0	0	225.32			3200	0.176	41.059	1.2	1251.29	1.59	0.0426178	0	225.33	0.0604653	13.6247	3200	0.178	40.793	1.198	1204.8	1.611	0.0971171	0	225.35	0.137788	31.0505	3200	0.18	40.483	1.209	1193.34	1.631	0.101933	0	225.32	0.144621	32.5861	3200	0.182	40.189	1.221	1186.28
	3250	0.17	41.773	1.199	1295.6	1.569	0	0	226.84	0		3250	0.168	41.678	1.196	1241.1	1.589	0.0874438	0	226.85	0.124064	28.1438	3250	0.17	41.391	1.196	1202.07	1.609	0.0964047	0	226.87	0.136777	31.0306	3250	0.172	41.075	1.208	1192.38	1.629	0.101677	0	226.78	0.144258	32.7148	3250	0.174	40.778	1.22	1185.35
	3300	0.162	42.415	1.198	1292.68	1.568	0	0	228.41	0		3300	0.16	42.291	1.192	1231.27	1.588	0.09052	0	228.42	0.128428	29.3355	3300	0.162	41.987	1.195	1200.27	1.607	0.0957198	0	228.43	0.135805	31.022	3300	0.164	41.667	1.207	1191.52	1.627	0.101166	0	228.18	0.143532	32.7511	3300	0.166	41.366	1.218	1184.47
	3350	0.15	43.059	1.32	1288.43	1.716	0	0	229.94	0		3350	0.15	42.903	1.312	1222.62	1.737	0.0899138	0	229.96	0.127568	29.3355	3350	0.151	42.585	1.318	1198.14	1.759	0.0950571	0	229.95	0.134865	31.0123	3350	0.153	42.261	1.332	1189.84	1.78	0.101074	0	229.43	0.143402	32.9007	3350	0.155	41.957	1.345	1182.7
	3400	0.139	43.7	1.318	1282.53	1.715	0	0	231.6	0		3400	0.139	43.511	1.308	1215.87	1.735	0.0892694	0	231.62	0.126654	29.3355	3400	0.14	43.183	1.317	1197.11	1.757	0.0944999	0	231.58	0.134075	31.049	3400	0.142	42.855	1.331	1189.01	1.778	0.1009	0	230.82	0.143155	33.043	3400	0.144	42.547	1.343	1181.83
	3450	0.128	44.338	1.315	1274.63	1.713	0.0001	0	233.23	0.000119879		3450	0.128	44.116	1.306	1210.68	1.734	0.0886493	0	233.24	0.125774	29.3355	3450	0.13	43.78	1.316	1196.21	1.755	0.0941858	0	233.14	0.133629	31.1543	3450	0.131	43.448	1.33	1188.17	1.777	0.100589	0	232.18	0.142714	33.1354	3450	0.133	43.137	1.342	1180.94
	3500	0.117	44.971	1.311	1264.67	1.712	0.0011	0	234.87	0.00131867		3500	0.117	44.719	1.303	1207.02	1.732	0.0874438	0	234.87	0.124064	29.1388	3500	0.119	44.376	1.315	1195.35	1.754	0.093819	0	234.67	0.133109	31.2366	3500	0.12	44.041	1.328	1187.32	1.775	0.100107	0	233.55	0.14203	33.1712	3500	0.122	43.727	1.341	1180.01
	3550	0.106	45.599	1.306	1253.02	1.711	0.0677716	0	236.51	0.081244	19.215	3550	0.107	45.321	1.302	1204.46	1.73	0.0862612	0	236.48	0.122386	28.9418	3550	0.108	44.973	1.314	1194.51	1.752	0.0934754	0	236.16	0.132621	31.3198	3550	0.109	44.634	1.327	1186.44	1.773	0.0997764	0	234.93	0.141561	33.2569	3550	0.111	44.316	1.34	1179.06
	3600	0.095	46.221	1.301	1240.6	1.709	0.0793273	0	238.2	0.095097	22.6521	3600	0.096	45.921	1.301	1202.85	1.729	0.0856429	0	238.11	0.121509	28.9324	3600	0.097	45.568	1.313	1193.66	1.75	0.0931556	0	237.64	0.132167	31.4082	3600	0.098	45.226	1.326	1185.54	1.771	0.0995046	0	236.38	0.141175	33.371	3600	0.1	44.904	1.339	1178.08
	3650	0.085	46.836	1.296	1228.76	1.708	0.0798932	0	239.97	0.0957753	22.9832	3650	0.085	46.521	1.3	1201.7	1.727	0.0862612	0	239.78	0.122386	29.3456	3650	0.086	46.164	1.313	1192.8	1.748	0.0937754	0	239.17	0.133047	31.8208	3650	0.087	45.817	1.325	1184.61	1.769	0.100107	0	237.93	0.14203	33.7933	3650	0.089	45.492	1.337	1177.08
	3700	0.074	47.446	1.291	1218.98	1.706	0.0804798	0	241.75	0.0964785	23.3237	3700	0.075	47.12	1.299	1200.76	1.725	0.0868427	0	241.4	0.123211	29.7431	3700	0.076	46.759	1.312	1191.92	1.746	0.0944203	0	240.68	0.133962	32.2419	3700	0.077	46.408	1.324	1183.66	1.767	0.100656	0	239.49	0.142809	34.2012	3700	0.078	46.08	1.336	1176.04
	3750	0.063	48.052	1.288	1212.27	1.704	0.0810405	0	243.5	0.0971508	23.6562	3750	0.064	47.719	1.298	1199.96	1.723	0.0874438	0	242.97	0.124064	30.1437	3750	0.065	47.353	1.311	1191.1	1.744	0.0950205	0	242.21	0.134813	32.6531	3750	0.066	46.999	1.323	1182.77	1.765	0.100956	0	241.08	0.143234	34.5309	3750	0.067	46.667	1.335	1175.07
	3800	0.046	48.662	1.554	1207.89	2.03	0.0902078	0	245.26	0.10814	26.5225	3800	0.047	48.323	1.567	1198.05	2.053	0.096	0	244.55	0.115084	28.1438	3800	0.048	47.953	1.582	1189.07	2.078	0.104	0	243.77	0.124674	30.3919	3800	0.048	47.595	1.597	1180.58	2.103	0.112	0	242.7	0.134265	32.5861	3800	0.049	47.259	1.612	1172.72
	3850	0.035	49.265	1.379	1206.56	1.815	0.0895578	0	247.04	0.107361	26.5225	3850	0.035	48.922	1.391	1197.93	1.836	0.0953489	0	246.22	0.114304	28.1438	3850	0.036	48.548	1.405	1188.96	1.858	0.103297	0	245.43	0.123831	30.3919	3850	0.036	48.186	1.418	1180.44	1.88	0.111216	0	244.41	0.133325	32.5861	3850	0.036	47.846	1.431	1172.53
	3900	0.023	49.868	1.378	1205.54	1.813	0.0889243	0	248.8	0.106602	26.5225	3900	0.023	49.52	1.39	1197.11	1.834	0.0946912	0	247.93	0.113515	28.1438	3900	0.024	49.142	1.404	1188.09	1.856	0.102582	0	247.14	0.122974	30.3919	3900	0.024	48.776	1.417	1179.48	1.878	0.110412	0	246.19	0.132361	32.5861	3900	0.024	48.433	1.429	1171.48
	3950	0.011	50.47	1.377	1204.71	1.812	0.0883173	0	250.51	0.105874	26.5225	3950	0.012	50.118	1.39	1196.27	1.832	0.0940502	0	249.62	0.112747	28.1438	3950	0.012	49.736	1.403	1187.19	1.854	0.101885	0	248.83	0.122139	30.3919	3950	0.012	49.366	1.416	1178.49	1.876	0.10962	0	247.97	0.131411	32.5861	3950	0.012	49.018	1.428	1170.39
	4000	0	51.047	1.377	1203.97	1.81	0.0876455	0	252.43	0.105069	26.5225	4000	0	50.692	1.389	1195.5	1.83	0.0933286	0	251.55	0.111882	28.1438	4000	0	50.306	1.402	1186.37	1.852	0.101109	0	250.74	0.121209	30.3919	4000	0	49.931	1.415	1177.57	1.874	0.108743	0	249.97	0.13036	32.5861	4000	0	49.58	1.427	1169.38
																																											4.00025	562.386
										1.00023								0.0429149												A1	0.0283756	3.00008	698.895						30.248	0.00314798									2300
							0.0790405								A1	0.0283756		0.0880336			2.00108	476.075								A2	0.0239758						A1	0.0283756	30.2847	0.0812932									2350
							0.0784798								A2	0.0239758		0.0911465																			A2	0.0239758	30.303	0.110607									2400
			A1	0.0283756		3550					217.92							0.09052													0.0977941								30.3398	0.109704									2450
			A2	0.0239758		3600												0.0899138																					30.3767	0.108831									2500
						3650	0.0767716											0.0892694										30.8261	0.10066	`									30.3951	0.108002									2550
						3700	0.0773273										31.4465	0.0880549	0.0827284									30.8642	0.100746										30.4321	0.1072									2600
						3750	0.0779009										31.4663	0.0868525	0.0838828									30.8833	0.100037										30.4692	0.106396									2650
						3800	0.0784798										31.4861	0.0862332	0.0844578									30.9215	0.0992797										30.5064	0.105662									2700
						3850	0.0790405										28.7853	0.0868662										30.9406	0.0985583										30.5437	0.104918									2750
						3900											28.8184	0.0874295										30.9789	0.0977941										30.5623	0.104124									2800
						3950											28.8351	0.0880125										31.0174	0.097055										30.5998	0.10336									2850
						4000											28.8684	0.0816422										31.0366	0.0963779										30.6373	0.10263									2900
																	28.9017	0.0953489										31.0752	0.0956897										30.656	0.102336									2950
																	28.9184	0.0946912										31.1139	0.0951698										30.6937	0.10179									3000
																	28.9519	0.0940502										28.4252	0.0948203										30.7314	0.101628									3050
																	28.9855	0.0933286										28.4576	0.0944347										28.0899	0.101511									3100
																	29.0192	#DIV/0!										28.49	0.094069										28.1215	0.101182									3150
																	24.3546											28.5063	0.0937394										28.1373	0.100698									3200
																	27.2331											28.5388	0.0943792										28.169	0.100366									3250
																	27.2628											28.5714	0.0950164										28.2008	0.100119									3300
																	27.2926											28.6041	0.0956245										28.2326	0.100764									3350
																	27.3224											28.6369	0.0884403										28.2646	0.101316									3400
																												28.6697	0.103297										28.2965	0.101626									3450
																												24.0616	0.102582										28.3286	0.0952698									3500
																												26.9107	0.101885										23.7756										3550
																												26.9397	0.101109										26.5957	0.111216									3600
																												26.9687	#DIV/0!										26.6241	0.110412									3650
																												26.9978											26.6525	0.10962									3700
																																							26.6809	0.108743									3750
																	487.948																																3800
																																																	3850
																												698.436																					3900
																																																	3950
																																							871.949										4000

[truncated: 8 more columns]

## Sheet: 泥浆池增量变化
	无溶解、无悬浮
	时刻	泥浆池增量
	0	0
	0.5	0.12
	1	0.227
	1.5	0.337
	2	0.448
	2.5	0.562
	3	0.677
	3.5	0.794
	4	0.914
	4.5	1.035
	5	1.159
	5.5	1.284
	6	1.412
	6.5	1.542
	7	1.675
	7.5	1.809
	8	1.946
	8.5	2.086
	9	2.228
	9.5	2.372
	10	2.519													4.42	0.999025		4.5
	10.5	2.669													8.23	1.99917		8
	11	2.821													11.53	2.99918		11.5
	11.5	2.976													14.49	4.00177		14.5
	12	3.134													17.18	4.99954		17
	12.5	3.295
	13	3.46
	13.5	3.627
	14	3.798
	14.5	3.972
	15	4.15
	15.5	4.332
	16	4.518
	16.5	4.707
	17	4.901
	17.5	5.1
	18	5.303
	18.5	5.511
	19	5.724
	19.5	5.943
	20	6.167
	20.5	6.167
	21	6.55
	21.5	6.55
	22	6.55
	22.5	6.55
	23	6.55
	23.5	6.55
	24	6.55
	24.5	6.55
	25	6.55
	25.5	6.55
	26	6.55
	26.5	6.55
	27	6.55
	27.5	6.55
	28	6.55
	28.5	6.55
	29	6.55
	29.5	6.55
	30	6.55
	30.5	6.55
	31	6.55
	31.5	6.55
	32	6.55
	32.5	6.55
	33	6.55
	33.5	6.55
	34	6.55
	34.5	6.55
