# Supplementary material for: A drilling wellbore pressure calculation model considering the effect of gas dissolution and suspension
Source: Frontiers journal article supplement (doi:10.3389/feart.2022.993876), 2022-09-27
Supplement: Data_Sheet_2.xlsx [file Data_Sheet_2.xlsx]

## Sheet: 不同油水比溶解度
	油水比0.2	1m3									油水比0.4											油水比0.6											油水比0.8											油水比1
密度	井深m	环空压耗	环空压力	泥浆流速m/s	平均密度	实际气速	自由气VF	溶解气wc	气体体积	气体质量	井深m	环空压耗	环空压力	泥浆流速m/s	平均密度	实际气速	自由气VF	溶解气wc	气体密度	气体体积	气体质量	井深m	环空压耗	环空压力	泥浆流速m/s	平均密度	实际气速	自由气VF	溶解气wc	气体密度			井深m	环空压耗	环空压力	泥浆流速m/s	平均密度	实际气速	自由气VF	溶解气wc	气体密度			井深m	环空压耗	环空压力	泥浆流速m/s	平均密度	实际气速
	0	4.276	0	0.005	1524.33	5.499	0.293	0			0	4.625	0	0.011	1252.76	5.501	0.292	0	0.68051			0	9.091	0	0.579	741.2	419.536	0.497	0	0.68051			0	8.395	0	0.609	758.99	97.976	0.485	0	0.68051			0	8.758	0	0.81	753.36	379.273
	50	8.385	0.777	0.625	826.34	78.692	0.481	0			50	8.931	0.759	0.319	760.48	81.488	0.484	0	5.0864			50	8.64	0.804	0.551	786.85	56.075	0.475	0	5.0864			50	8.044	0.745	0.576	807.67	36.67	0.461	0	5.0864			50	8.319	0.778	0.762	773.41	53.424
	100	8.062	1.518	0.588	865.09	36.068	0.46	0			100	8.563	1.517	0.326	811.35	34.944	0.462	0	9.6243			100	8.373	1.46	0.525	825.2	31.727	0.455	0	9.6243			100	7.914	1.281	0.553	851.47	25.678	0.444	0	9.6243			100	8.088	1.373	0.721	800.24	31.046
	150	7.93	2.071	0.557	899.22	25.935	0.444	0			150	8.427	2.047	0.326	854.83	25.306	0.448	0	14.301			150	8.264	1.985	0.503	848.67	23.757	0.44	0	14.301			150	7.836	1.803	0.531	895.22	20.072	0.428	0	14.301			150	7.988	1.861	0.687	826.39	23.37
	200	7.848	2.601	0.529	940.99	20.569	0.43	0			200	8.341	2.555	0.324	891.61	20.158	0.435	0	19.148			200	8.193	2.48	0.482	863.94	19.307	0.427	0	19.148			200	7.781	2.31	0.51	929.01	16.67	0.414	0	19.148			200	7.922	2.335	0.653	862.19	18.98
	250	7.79	3.131	0.502	990.04	17.097	0.417	0			250	8.281	3.056	0.32	912.56	16.856	0.422	0	24.162			250	8.141	2.963	0.462	877.97	16.372	0.414	0	24.162			250	7.74	2.813	0.491	946.54	14.333	0.401	0	24.162			250	7.874	2.812	0.62	904.39	16.024
	300	7.747	3.67	0.477	1025.21	14.655	0.403	0			300	8.235	3.551	0.316	923.28	14.569	0.41	0	29.34			300	8.1	3.44	0.443	891.44	14.28	0.402	0	29.34			300	7.707	3.31	0.472	955.65	12.641	0.388	0	29.34			300	7.837	3.302	0.588	934.62	13.885
	350	7.712	4.209	0.453	1032.19	12.865	0.391	0			350	8.199	4.043	0.311	933.59	12.885	0.398	0	34.714			350	8.067	3.916	0.424	901.68	12.705	0.391	0	34.714			350	7.681	3.805	0.454	962.19	11.355	0.376	0	34.723			350	7.807	3.799	0.557	946.1	12.281
	400	7.684	4.746	0.43	1042.1	11.502	0.379	0			400	8.17	4.535	0.305	944.86	11.59	0.387	0	40.25			400	8.04	4.39	0.406	908.8	11.475	0.38	0	40.25			400	7.658	4.298	0.436	970.56	10.342	0.364	0	40.25			400	7.782	4.295	0.527	953.81	11.05
	450	7.661	5.285	0.409	1056.41	10.423	0.367	0			450	8.145	5.027	0.3	953.79	10.56	0.376	0	45.951			450	8.017	4.863	0.389	913.1	10.491	0.369	0	45.951			450	7.639	4.792	0.42	977.17	9.521	0.353	0	45.951			450	7.761	4.792	0.5	964.14	10.075
	500	7.641	5.828	0.389	1072.02	9.546	0.356	0			500	8.124	5.519	0.295	962.42	9.723	0.365	0	51.869			500	7.997	5.335	0.373	914.29	9.686	0.359	0	51.869			500	7.622	5.285	0.404	981.23	8.844	0.343	0	51.869			500	7.743	5.29	0.473	971.38	9.282
	550	7.624	6.376	0.37	1087.36	8.819	0.345	0			550	8.105	6.014	0.29	970.89	9.03	0.355	0	57.895			550	7.98	5.804	0.357	911.66	9.017	0.35	0	57.895			550	7.607	5.779	0.39	986.95	8.276	0.333	0	57.895			550	7.727	5.79	0.449	974.49	8.626
	600	7.608	6.929	0.353	1100.99	8.207	0.335	0			600	8.089	6.51	0.285	978.97	8.446	0.345	0	64.071			600	7.964	6.269	0.343	907.15	8.455	0.341	0	64.071			600	7.594	6.275	0.376	993.24	7.791	0.324	0	64.071			600	7.713	6.288	0.427	974.25	8.076
	650	7.595	7.486	0.337	1110.28	7.686	0.325	0			650	8.074	7.008	0.28	986.27	7.949	0.336	0	70.404			650	7.95	6.729	0.329	902.12	7.977	0.333	0	70.404			650	7.582	6.772	0.363	998.92	7.374	0.315	0	70.404			650	7.701	6.784	0.406	974.32	7.611
	700	7.583	8.045	0.322	1114.99	7.24	0.316	0			700	8.061	7.508	0.276	990.58	7.521	0.327	0	76.695			700	7.938	7.186	0.317	900.98	7.565	0.325	0	76.695			700	7.571	7.271	0.351	1001.86	7.011	0.307	0	76.695			700	7.689	7.278	0.387	968.96	7.212
	750	7.572	8.604	0.308	1111.69	6.855	0.307	0			750	8.049	8.007	0.271	982.82	7.152	0.319	0	83.009			750	7.926	7.643	0.305	908.91	7.206	0.317	0	83.009			750	7.561	7.768	0.339	995.41	6.695	0.299	0	83.009			750	7.679	7.767	0.37	951.64	6.868
	800	7.562	9.155	0.295	1081.36	6.523	0.298	0			800	8.038	8.496	0.267	961.02	6.834	0.311	0	89.173			800	7.916	8.103	0.295	919.55	6.888	0.31	0	89.173			800	7.552	8.257	0.328	967.51	6.419	0.291	0	89.173			800	7.67	8.245	0.355	942.05	6.573
	850	7.553	9.677	0.283	1013.02	6.24	0.291	0			850	8.028	8.974	0.263	943.22	6.559	0.303	0	95.035			850	7.906	8.567	0.286	929.9	6.605	0.302	0	95.035			850	7.543	8.732	0.316	953.2	6.18	0.285	0	95.035			850	7.661	8.72	0.342	949.95	6.314
	900	7.545	10.181	0.271	999.53	5.999	0.284	0			900	8.019	9.445	0.259	939.15	6.319	0.297	0	100.05			900	7.897	9.035	0.278	939.96	6.35	0.295	0	100.05			900	7.535	9.207	0.305	961.96	5.968	0.279	0	100.05			900	7.653	9.199	0.33	959.59	6.082
	950	7.537	10.669	0.261	965.52	5.786	0.278	0			950	8.01	9.918	0.256	948.6	6.105	0.29	0	104.19			950	7.888	9.507	0.272	949.81	6.122	0.288	0	104.19			950	7.528	9.685	0.292	970.28	5.776	0.273	0	104.19			950	7.645	9.682	0.319	968.87	5.874
	1000	7.53	11.153	0.252	974.29	5.599	0.272	0.00356			1000	8.002	10.395	0.257	958.27	5.912	0.283	0.00505	107.16			1000	7.88	9.983	0.268	959.5	5.916	0.282	0.00622	107.16			1000	7.521	10.168	0.279	977.92	5.601	0.268	0.00771	107.16			1000	7.638	10.169	0.31	977.78	5.686
	1050	7.336	11.662	2.71	644.9	17.823	0.548	0.00378			1050	7.785	10.919	2.763	632.39	19.28	0.555	0.00532	110.69			1050	7.662	10.528	2.866	635.2	19.225	0.552	0.00657	110.7			1050	7.323	10.691	2.957	652.07	17.791	0.541	0.00813	110.7			1050	7.428	10.712	3.238	657.51	18.131
	1100	7.148	12.165	2.684	650.42	17.248	0.546	0.00394			1100	7.576	11.436	2.737	638.34	18.586	0.552	0.00558	115.84			1100	7.452	11.063	2.832	641.52	18.481	0.549	0.00691	115.84			1100	7.13	11.208	2.92	657.85	17.197	0.538	0.00852	115.84			1100	7.226	11.248	3.191	663.94	17.467
	1150	6.968	12.663	2.66	655.61	16.739	0.543	0.00409			1150	7.377	11.947	2.713	643.91	17.976	0.549	0.00583	120.69			1150	7.252	11.59	2.8	647.39	17.833	0.546	0.00725	120.69			1150	6.947	11.718	2.886	663.22	16.675	0.535	0.00891	120.7			1150	7.033	11.777	3.147	669.89	16.885
	1200	6.795	13.157	2.637	660.61	16.283	0.541	0.00425			1200	7.186	12.452	2.689	649.13	17.435	0.547	0.00609	125.48			1200	7.062	12.11	2.769	652.86	17.263	0.543	0.00759	125.49			1200	6.77	12.223	2.853	668.33	16.211	0.532	0.00929	125.49			1200	6.848	12.301	3.105	675.39	16.371
	1250	6.628	13.648	2.617	665.2	15.874	0.538	0.0044			1250	7.003	12.952	2.667	654.16	16.952	0.544	0.00634	130.04			1250	6.88	12.624	2.74	658.08	16.759	0.54	0.00793	130.05			1250	6.6	12.724	2.823	672.97	15.797	0.53	0.00967	130.05			1250	6.671	12.82	3.064	680.61	15.914
	1300	6.467	14.135	2.597	669.53	15.505	0.536	0.00455			1300	6.826	13.447	2.645	658.75	16.519	0.542	0.00659	134.54			1300	6.706	13.132	2.713	662.83	16.309	0.538	0.00826	134.54			1300	6.436	13.221	2.793	677.29	15.423	0.528	0.01005	134.55			1300	6.5	13.335	3.026	685.31	15.506
	1350	6.31	14.619	2.578	673.61	15.171	0.534	0.0047			1350	6.656	13.94	2.625	663.08	16.128	0.54	0.00684	138.75			1350	6.537	13.636	2.687	667.27	15.906	0.536	0.00859	138.75			1350	6.277	13.714	2.765	681.33	15.085	0.526	0.01043	138.76			1350	6.335	13.845	2.989	689.67	15.139
	1400	6.158	15.102	2.561	677.47	14.866	0.532	0.00485			1400	6.491	14.429	2.605	667.15	15.773	0.538	0.00709	142.8			1400	6.374	14.136	2.662	671.42	15.542	0.534	0.00892	142.8			1400	6.122	14.205	2.738	685.1	14.778	0.524	0.01081	142.81			1400	6.176	14.353	2.954	693.72	14.807
	1450	6.01	15.582	2.544	681.12	14.587	0.53	0.005			1450	6.331	14.916	2.586	670.99	15.449	0.536	0.00734	146.7			1450	6.216	14.633	2.638	675.32	15.213	0.532	0.00925	146.71			1450	5.972	14.693	2.712	688.63	14.498	0.523	0.01119	146.72			1450	6.021	14.858	2.921	697.48	14.506
	1500	5.866	16.06	2.528	684.57	14.331	0.528	0.00515			1500	6.175	15.4	2.568	674.62	15.154	0.534	0.00758	150.45			1500	6.062	15.127	2.616	678.97	14.913	0.53	0.00957	150.46			1500	5.826	15.178	2.687	691.94	14.241	0.521	0.01157	150.47			1500	5.87	15.36	2.889	700.96	14.232
	1550	5.725	16.537	2.513	687.84	14.096	0.527	0.0053			1550	6.023	15.882	2.551	678.04	14.882	0.533	0.00783	154.1			1550	5.912	15.618	2.594	682.41	14.639	0.529	0.0099	154.11			1550	5.683	15.662	2.663	695.05	14.004	0.52	0.01194	154.13			1550	5.723	15.859	2.858	704.21	13.98
	1600	5.587	17.012	2.498	690.94	13.878	0.525	0.00545			1600	5.874	16.362	2.534	681.28	14.632	0.531	0.00808	157.62			1600	5.766	16.107	2.574	685.64	14.388	0.527	0.01022	157.63			1600	5.543	16.144	2.64	697.96	13.785	0.518	0.01232	157.64			1600	5.58	16.356	2.828	707.22	13.75
	1650	5.452	17.486	2.484	693.88	13.676	0.524	0.0056			1650	5.729	16.841	2.518	684.35	14.401	0.53	0.00833	161			1650	5.624	16.593	2.554	688.69	14.157	0.526	0.01055	161.01			1650	5.407	16.624	2.618	700.71	13.583	0.517	0.01269	161.02			1650	5.44	16.851	2.8	710.03	13.537
	1700	5.319	17.959	2.47	696.68	13.488	0.522	0.00575			1700	5.587	17.318	2.503	687.26	14.187	0.528	0.00857	164.25			1700	5.484	17.078	2.535	691.56	13.943	0.524	0.01087	164.26			1700	5.273	17.102	2.597	703.29	13.395	0.516	0.01307	164.27			1700	5.303	17.345	2.772	712.64	13.341
	1750	5.189	18.431	2.457	699.33	13.313	0.521	0.0059			1750	5.448	17.794	2.488	690.02	13.987	0.527	0.00882	167.37			1750	5.347	17.561	2.517	694.27	13.745	0.523	0.01119	167.39			1750	5.141	17.579	2.576	705.73	13.219	0.515	0.01344	167.4			1750	5.169	17.836	2.746	715.08	13.159
	1800	5.061	18.902	2.445	701.85	13.15	0.52	0.00606			1800	5.311	18.269	2.473	692.64	13.802	0.526	0.00907	170.28			1800	5.213	18.042	2.499	696.84	13.561	0.522	0.01152	170.29			1800	5.012	18.055	2.556	708.04	13.055	0.514	0.01382	170.31			1800	5.037	18.326	2.72	717.36	12.99
	1850	4.935	19.372	2.433	704.25	12.997	0.519	0.00621			1850	5.177	18.743	2.459	695.14	13.628	0.524	0.00931	173.08			1850	5.082	18.521	2.483	699.27	13.39	0.521	0.01184	173.1			1850	4.885	18.53	2.537	710.21	12.902	0.513	0.0142	173.11			1850	4.908	18.815	2.695	719.48	12.832
	1900	4.811	19.842	2.421	706.54	12.854	0.518	0.00636			1900	5.045	19.215	2.446	697.51	13.466	0.523	0.00956	175.77			1900	4.952	19	2.466	701.58	13.23	0.52	0.01216	175.79			1900	4.761	19.003	2.518	712.28	12.758	0.512	0.01457	175.8			1900	4.781	19.301	2.671	721.47	12.685
	1950	4.688	20.31	2.409	708.71	12.719	0.517	0.00651			1950	4.915	19.687	2.433	699.77	13.313	0.522	0.00981	178.36			1950	4.825	19.477	2.451	703.76	13.081	0.519	0.01249	178.37			1950	4.638	19.476	2.5	714.23	12.622	0.511	0.01495	178.39			1950	4.656	19.781	2.648	723.27	12.549
	2000	4.568	20.779	2.398	710.78	12.592	0.516	0.00666			2000	4.787	20.158	2.42	701.93	13.17	0.521	0.01005	180.85			2000	4.699	19.953	2.436	705.84	12.94	0.518	0.01281	180.87			2000	4.517	19.948	2.483	716.09	12.494	0.51	0.01533	180.88			2000	4.533	20.259	2.625	724.96	12.422
	2050	4.449	21.246	2.387	712.76	12.472	0.515	0.00681			2050	4.661	20.628	2.408	703.99	13.035	0.52	0.0103	183.25			2050	4.576	20.428	2.422	707.82	12.808	0.517	0.01314	183.27			2050	4.397	20.418	2.466	717.85	12.373	0.51	0.0157	183.28			2050	4.411	20.735	2.603	726.54	12.302
	2100	4.332	21.713	2.376	714.64	12.358	0.514	0.00696			2100	4.537	21.097	2.396	705.96	12.907	0.519	0.01055	185.66			2100	4.454	20.902	2.408	709.71	12.684	0.516	0.01346	185.68			2100	4.28	20.888	2.449	719.52	12.259	0.509	0.01608	185.69			2100	4.292	21.211	2.582	728.02	12.188
	2150	4.216	22.18	2.365	716.43	12.251	0.513	0.00711			2150	4.414	21.566	2.385	707.84	12.787	0.519	0.0108	187.99			2150	4.334	21.374	2.395	711.51	12.567	0.516	0.01378	188			2150	4.164	21.358	2.434	721.12	12.15	0.508	0.01646	188.02			2150	4.174	21.686	2.561	729.41	12.081
	2200	4.101	22.646	2.355	718.15	12.149	0.512	0.00726			2200	4.293	22.034	2.374	709.64	12.673	0.518	0.01105	190.23			2200	4.215	21.847	2.382	713.22	12.456	0.515	0.01411	190.24			2200	4.049	21.826	2.418	722.64	12.047	0.508	0.01684	190.26			2200	4.058	22.16	2.541	730.72	11.978
	2250	3.987	23.111	2.345	719.78	12.052	0.511	0.00741			2250	4.173	22.502	2.363	711.36	12.564	0.517	0.0113	192.31			2250	4.098	22.318	2.369	714.87	12.351	0.514	0.01443	192.32			2250	3.936	22.294	2.403	724.09	11.949	0.507	0.01722	192.33			2250	3.943	22.633	2.521	731.96	11.881
	2300	3.875	23.577	2.335	721.34	11.96	0.511	0.00757			2300	4.055	22.969	2.352	713.01	12.461	0.516	0.01155	194.41			2300	3.982	22.788	2.357	716.44	12.252	0.513	0.01476	194.42			2300	3.824	22.761	2.389	725.47	11.856	0.507	0.0176	194.43			2300	3.829	23.106	2.501	733.12	11.788
	2350	3.764	24.041	2.325	722.84	11.873	0.51	0.00772			2350	3.938	23.435	2.342	714.59	12.363	0.516	0.0118	196.53			2350	3.867	23.258	2.346	717.94	12.158	0.513	0.01508	196.54			2350	3.713	23.228	2.374	726.8	11.767	0.506	0.01798	196.55			2350	3.717	23.577	2.482	734.22	11.7
	2400	3.654	24.506	2.315	724.27	11.789	0.509	0.00787			2400	3.822	23.901	2.332	716.11	12.27	0.515	0.01205	198.49			2400	3.754	23.727	2.334	719.39	12.068	0.512	0.01541	198.51			2400	3.604	23.694	2.361	728.06	11.682	0.506	0.01836	198.52			2400	3.606	24.048	2.464	735.25	11.616
	2450	3.546	24.97	2.306	725.64	11.709	0.509	0.00803			2450	3.708	24.367	2.322	717.57	12.181	0.514	0.0123	200.3			2450	3.642	24.196	2.324	720.77	11.982	0.512	0.01574	200.32			2450	3.495	24.159	2.347	729.28	11.6	0.505	0.01874	200.33			2450	3.497	24.518	2.446	736.23	11.535
	2500	3.438	25.433	2.297	726.95	11.632	0.508	0.00818			2500	3.594	24.832	2.313	718.97	12.096	0.514	0.01255	202.15			2500	3.531	24.662	2.313	722.09	11.901	0.511	0.01606	202.17			2500	3.388	24.624	2.334	730.44	11.522	0.505	0.01912	202.18			2500	3.389	24.988	2.428	737.16	11.458
	2550	3.331	25.897	2.287	728.21	11.559	0.508	0.00833			2550	3.482	25.297	2.303	720.32	12.014	0.513	0.0128	204.02			2550	3.421	25.127	2.303	723.36	11.824	0.511	0.01639	204.04			2550	3.282	25.088	2.322	731.55	11.448	0.504	0.0195	204.05			2550	3.281	25.456	2.411	738.03	11.385
	2600	3.225	26.36	2.278	729.42	11.488	0.507	0.00849			2600	3.371	25.761	2.294	721.62	11.937	0.513	0.01306	205.84			2600	3.311	25.59	2.293	724.57	11.751	0.51	0.01671	205.86			2600	3.177	25.552	2.309	732.62	11.376	0.504	0.01989	205.88			2600	3.175	25.924	2.394	738.86	11.314
	2650	3.12	26.822	2.27	730.59	11.421	0.507	0.00864			2650	3.26	26.225	2.285	722.87	11.862	0.512	0.01331	207.61			2650	3.203	26.054	2.284	725.74	11.68	0.51	0.01704	207.63			2650	3.072	26.016	2.297	733.65	11.307	0.504	0.02027	207.65			2650	3.07	26.392	2.378	739.66	11.246
	2700	3.016	27.285	2.261	731.71	11.356	0.506	0.0088			2700	3.151	26.689	2.277	724.07	11.79	0.512	0.01356	209.33			2700	3.096	26.517	2.275	726.87	11.612	0.509	0.01737	209.35			2700	2.969	26.479	2.286	734.64	11.241	0.503	0.02065	209.36			2700	2.966	26.858	2.362	740.41	11.18
	2750	2.912	27.747	2.253	732.79	11.294	0.506	0.00896			2750	3.043	27.153	2.268	725.23	11.722	0.511	0.01382	211.01			2750	2.99	26.98	2.266	727.97	11.547	0.509	0.01769	211.02			2750	2.867	26.941	2.274	735.6	11.177	0.503	0.02104	211.04			2750	2.863	27.324	2.346	741.12	11.118
	2800	2.81	28.209	2.245	733.84	11.234	0.505	0.00911			2800	2.935	27.616	2.26	726.36	11.656	0.511	0.01407	212.63			2800	2.884	27.442	2.257	729.03	11.484	0.508	0.01802	212.65			2800	2.765	27.404	2.263	736.52	11.116	0.503	0.02142	212.66			2800	2.761	27.79	2.331	741.81	11.057
	2850	2.708	28.67	2.237	734.86	11.176	0.505	0.00927			2850	2.828	28.079	2.252	727.44	11.592	0.51	0.01433	214.21			2850	2.779	27.904	2.248	730.05	11.424	0.508	0.01835	214.23			2850	2.664	27.865	2.252	737.41	11.057	0.502	0.02181	214.25			2850	2.659	28.255	2.316	742.46	10.999
	2900	2.607	29.132	2.229	735.84	11.12	0.505	0.00943			2900	2.722	28.541	2.244	728.49	11.531	0.51	0.01459	215.84			2900	2.676	28.366	2.24	731.04	11.365	0.508	0.01868	215.86			2900	2.564	28.327	2.242	738.28	11	0.502	0.0222	215.87			2900	2.559	28.719	2.302	743.09	10.942
	2950	2.507	29.593	2.221	736.79	11.066	0.504	0.00959			2950	2.617	29.004	2.237	729.5	11.472	0.509	0.01484	217.34			2950	2.572	28.828	2.232	732.01	11.309	0.507	0.01901	217.36			2950	2.465	28.788	2.232	739.12	10.945	0.502	0.02259	217.37			2950	2.459	29.183	2.288	743.7	10.888
	3000	2.407	30.054	2.214	737.72	11.015	0.504	0.00975			3000	2.513	29.466	2.229	730.48	11.415	0.509	0.0151	218.88			3000	2.47	29.289	2.225	732.94	11.255	0.507	0.01934	218.9			3000	2.367	29.249	2.222	739.93	10.892	0.501	0.02297	218.91			3000	2.36	29.647	2.274	744.28	10.836
	3050	2.308	30.515	2.207	738.62	10.964	0.503	0.00991			3050	2.409	29.927	2.222	731.44	11.361	0.509	0.01536	220.55			3050	2.368	29.75	2.217	733.85	11.203	0.507	0.01967	220.57			3050	2.269	29.709	2.213	740.73	10.84	0.501	0.02336	220.58			3050	2.262	30.11	2.261	744.84	10.785
	3100	2.21	30.975	2.2	739.49	10.916	0.503	0.01007			3100	2.306	30.389	2.215	732.36	11.308	0.508	0.01562	222.18			3100	2.267	30.211	2.21	734.73	11.152	0.506	0.02001	222.2			3100	2.172	30.169	2.204	741.5	10.791	0.501	0.02375	222.21			3100	2.165	30.572	2.248	745.38	10.736
	3150	2.112	31.436	2.194	740.35	10.869	0.503	0.01023			3150	2.204	30.85	2.208	733.26	11.257	0.508	0.01588	223.77			3150	2.167	30.672	2.203	735.6	11.103	0.506	0.02034	223.79			3150	2.076	30.629	2.195	742.26	10.743	0.501	0.02414	223.79			3150	2.068	31.034	2.236	745.92	10.688
	3200	2.015	31.896	2.187	741.18	10.824	0.502	0.01039			3200	2.102	31.312	2.202	734.14	11.207	0.507	0.01614	225.33			3200	2.067	31.132	2.196	736.43	11.056	0.506	0.02067	225.35			3200	1.98	31.089	2.187	743.01	10.697	0.5	0.02454	225.32	0		3200	1.973	31.495	2.224	746.43	10.642
	3250	1.918	32.356	2.181	741.99	10.78	0.502	0.01055	0		3250	2.001	31.773	2.195	735	11.159	0.507	0.0164	226.85			3250	1.967	31.593	2.189	737.25	11.01	0.505	0.02101	226.87			3250	1.885	31.548	2.179	743.74	10.652	0.5	0.02493	226.78	0		3250	1.877	31.957	2.212	746.94	10.598
	3300	1.822	32.816	2.175	742.83	10.737	0.502	0.01072	0		3300	1.901	32.233	2.189	735.88	11.113	0.507	0.01666	228.42			3300	1.869	32.053	2.183	738.1	10.966	0.505	0.02135	228.43			3300	1.79	32.007	2.171	744.51	10.608	0.5	0.02532	228.18	0		3300	1.783	32.417	2.201	747.5	10.555
	3350	1.697	33.296	2.474	725.58	11.427	0.518	0.01089	0		3350	1.771	32.715	2.491	718.66	11.828	0.523	0.01694	229.96			3350	1.741	32.533	2.484	720.84	11.671	0.521	0.0217	229.95			3350	1.668	32.486	2.468	727.18	11.287	0.516	0.02574	229.43	0		3350	1.66	32.897	2.498	730.01	11.229
	3400	1.573	33.776	2.468	726.45	11.38	0.517	0.01106	0		3400	1.641	33.197	2.485	719.58	11.777	0.522	0.01722	231.62			3400	1.614	33.014	2.477	721.72	11.622	0.52	0.02206	231.58			3400	1.545	32.965	2.461	728.01	11.239	0.516	0.02615	230.82	0		3400	1.538	33.377	2.487	730.62	11.182
	3450	1.45	34.255	2.461	727.29	11.335	0.517	0.01123	0		3450	1.512	33.679	2.478	720.48	11.728	0.522	0.0175	233.24			3450	1.487	33.495	2.47	722.58	11.575	0.52	0.02241	233.14	0		3450	1.424	33.444	2.453	728.82	11.193	0.515	0.02657	232.18	0		3450	1.417	33.857	2.476	731.23	11.136
	3500	1.327	34.735	2.455	728.11	11.29	0.517	0.01141	0		3500	1.384	34.161	2.472	721.36	11.68	0.522	0.01778	234.87	0		3500	1.361	33.975	2.464	723.43	11.528	0.52	0.02277	234.67	0		3500	1.303	33.922	2.447	729.62	11.149	0.515	0.02698	233.55	0		3500	1.296	34.336	2.466	731.82	11.091
	3550	1.204	35.214	2.449	728.9	11.248	0.516	0.01158	0		3550	1.256	34.642	2.466	722.22	11.633	0.521	0.01806	236.48	0		3550	1.235	34.456	2.458	724.25	11.484	0.519	0.02313	236.16	0		3550	1.183	34.4	2.44	730.41	11.105	0.515	0.0274	234.93	0		3550	1.176	34.815	2.456	732.41	11.048
	3600	1.083	35.693	2.443	729.68	11.206	0.516	0.01176	0		3600	1.129	35.123	2.461	723.06	11.588	0.521	0.01834	238.11	0		3600	1.11	34.935	2.452	725.06	11.44	0.519	0.02349	237.64	0		3600	1.063	34.877	2.434	731.19	11.063	0.514	0.02782	236.38	0		3600	1.057	35.293	2.446	732.99	11.006
	3650	0.962	36.172	2.437	730.43	11.166	0.516	0.01193	0		3650	1.003	35.603	2.455	723.88	11.544	0.521	0.01862	239.78	0		3650	0.986	35.415	2.446	725.85	11.398	0.519	0.02385	239.17	0		3650	0.944	35.355	2.428	731.96	11.023	0.514	0.02824	237.93	0		3650	0.939	35.771	2.437	733.57	10.965
	3700	0.841	36.65	2.432	731.16	11.127	0.515	0.01211	0		3700	0.877	36.084	2.45	724.69	11.502	0.52	0.0189	241.4	0		3700	0.863	35.894	2.441	726.63	11.357	0.519	0.02421	240.68	0		3700	0.826	35.832	2.422	732.71	10.983	0.514	0.02866	239.49	0		3700	0.821	36.248	2.428	734.15	10.926
	3750	0.721	37.129	2.426	731.9	11.089	0.515	0.01229	0		3750	0.752	36.564	2.445	725.51	11.461	0.52	0.01918	242.97	0		3750	0.74	36.373	2.436	727.43	11.318	0.518	0.02457	242.21	0		3750	0.708	36.309	2.416	733.49	10.945	0.513	0.02908	241.08	0		3750	0.704	36.725	2.42	734.77	10.887
	3800	0.534	37.668	3	718.64	12.998	0.528	0.01249	0		3800	0.557	37.108	3.024	712.42	13.435	0.532	0.01951	244.55	0		3800	0.548	36.915	3.012	714.27	13.267	0.531	0.02498	243.77	0		3800	0.524	36.846	2.988	720.2	12.825	0.526	0.02956	242.7	0		3800	0.521	37.261	2.99	721.35	12.757
	3850	0.398	38.164	2.575	736.74	11.868	0.512	0.01268	0		3850	0.415	37.607	2.596	730.61	12.262	0.516	0.01981	246.22	0		3850	0.408	37.413	2.586	732.47	12.11	0.515	0.02536	245.43	0		3850	0.391	37.341	2.565	738.36	11.711	0.51	0.03	244.41	0		3850	0.388	37.756	2.565	739.38	11.649
	3900	0.264	38.66	2.57	737.47	11.828	0.511	0.01287	0		3900	0.275	38.105	2.591	731.42	12.218	0.516	0.02011	247.93	0		3900	0.271	37.91	2.582	733.27	12.068	0.514	0.02574	247.14	0		3900	0.259	37.835	2.56	739.11	11.671	0.509	0.03044	246.19	0		3900	0.257	38.249	2.558	740.04	11.609
	3950	0.13	39.155	2.564	738.17	11.789	0.511	0.01306	0		3950	0.136	38.603	2.586	732.21	12.176	0.515	0.02041	249.62	0		3950	0.134	38.406	2.577	734.07	12.027	0.514	0.02612	248.83	0		3950	0.128	38.328	2.555	739.84	11.631	0.509	0.03089	247.97	0		3950	0.127	38.742	2.551	740.69	11.569
	4000	0.003	39.63	2.559	738.82	11.752	0.511	0.01324	0		4000	0.003	39.08	2.582	732.94	12.136	0.515	0.02069	251.55	0		4000	0.003	38.883	2.573	734.81	11.989	0.513	0.02649	250.74	0		4000	0.003	38.802	2.549	740.49	11.595	0.509	0.03131	249.97	0		4000	0.003	39.215	2.545	741.3	11.532
[truncated: 7 more columns]

## Sheet: 不同油水比溢流476kg
	0.8	476kg											0.2	476kg												0.1	476kg
密度	井深m	环空压耗	环空压力	泥浆流速m/s	平均密度	实际气速	自由气VF	溶解气wc	密度	气体体积		气体质量	井深m	环空压耗	环空压力	泥浆流速m/s	平均密度	实际气速	自由气VF	溶解气wc	气体密度	运移气体体积	运移气质量	溶解气质量	侵入气总质量	井深m	环空压耗	环空压力	泥浆流速m/s	平均密度	实际气速	自由气VF	溶解气wc	气体密度	运移气体体积	运移气质量	溶解气质量	侵入气总质量			饱和溶解度
	0	0.449	0	0.158	1300	0	0	0	0.68051	0			0	0.449	0	0.158	1300	0	0	0	0.68051	0				0	0.468	0	0.163	1300	0	0	0	0.68051	0						0
	50	0.449	0.637	0.158	1300	0	0	0	5.0864	0			50	0.449	0.637	0.158	1300	0	0	0	5.0864	0				50	0.467	0.637	0.163	1300	0	0	0	5.0864	0						0
	100	0.449	1.274	0.158	1300	0	0	0	9.6243	0			100	0.449	1.274	0.158	1300	0	0	0	9.6243	0				100	0.467	1.274	0.163	1300	0	0	0	9.6243	0						0
	150	0.449	1.911	0.158	1300	0	0	0	14.301	0			150	0.449	1.911	0.158	1300	0	0	0	14.301	0				150	0.467	1.911	0.163	1300	0	0	0	14.301	0						0
	200	0.449	2.549	0.158	1300	0	0	0	19.148	0			200	0.449	2.549	0.158	1300	0	0	0	19.148	0				200	0.467	2.549	0.163	1300	0	0	0	19.148	0						0
	250	0.448	3.186	0.158	1300	0	0	0	24.162	0			250	0.448	3.186	0.158	1300	0	0	0	24.162	0				250	0.467	3.186	0.163	1300	0	0	0	24.162	0						0
	300	0.448	3.823	0.158	1300	0	0	0	29.34	0			300	0.448	3.823	0.158	1300	0	0	0	29.34	0				300	0.467	3.823	0.163	1300	0	0	0	29.34	0						0
	350	0.448	4.46	0.158	1300	0	0	0	34.714	0			350	0.448	4.46	0.158	1300	0	0	0	34.714	0				350	0.467	4.46	0.163	1300	0	0	0	34.714	0						0
	400	0.448	5.097	0.158	1300	0	0	0	40.25	0			400	0.448	5.097	0.158	1300	0	0	0	40.25	0				400	0.466	5.097	0.163	1300	0	0	0	40.25	0						0
	450	0.448	5.734	0.158	1300	0	0	0	45.951	0			450	0.448	5.734	0.158	1300	0	0	0	45.951	0				450	0.466	5.734	0.163	1300	0	0	0	45.951	0						0
	500	0.448	6.371	0.158	1300	0	0	0	51.869	0			500	0.448	6.371	0.158	1300	0	0	0	51.869	0				500	0.466	6.371	0.163	1300	0	0	0	51.869	0						0
	550	0.448	7.009	0.158	1300	0	0	0	57.895	0			550	0.448	7.009	0.158	1300	0	0	0	57.895	0				550	0.466	7.009	0.163	1300	0	0	0	57.895	0						0
	600	0.447	7.646	0.158	1300	0	0	0	64.071	0			600	0.447	7.646	0.158	1300	0	0	0	64.071	0				600	0.466	7.646	0.163	1300	0	0	0	64.071	0						0
	650	0.447	8.283	0.158	1300	0	0	0	70.404	0			650	0.447	8.283	0.158	1300	0	0	0	70.404	0				650	0.466	8.283	0.163	1300	0	0	0	70.404	0						0
	700	0.447	8.92	0.158	1300	0	0	0	76.695	0			700	0.447	8.92	0.158	1300	0	0	0	76.695	0				700	0.466	8.92	0.163	1300	0	0	0	76.695	0						0
	750	0.447	9.557	0.158	1300	0	0	0	83.009	0			750	0.447	9.557	0.158	1300	0	0	0	83.009	0				750	0.465	9.557	0.163	1300	0	0	0	83.009	0						0
	800	0.447	10.194	0.158	1300	0	0	0	89.173	0			800	0.447	10.194	0.158	1300	0	0	0	89.173	0				800	0.465	10.194	0.163	1300	0	0	0	89.173	0						0
	850	0.447	10.831	0.158	1300	0	0	0	95.035	0			850	0.447	10.831	0.158	1300	0	0	0	95.035	0				850	0.465	10.831	0.163	1300	0	0	0	95.035	0						0
	900	0.447	11.468	0.158	1300	0	0	0	100.05	0			900	0.447	11.468	0.158	1300	0	0	0	100.05	0				900	0.465	11.469	0.163	1300	0	0	0	100.05	0						0
	950	0.447	12.106	0.158	1300	0	0	0	104.19	0			950	0.447	12.106	0.158	1300	0	0	0	104.19	0				950	0.465	12.106	0.163	1300	0	0	0	104.19	0						0
	1000	0.446	12.743	0.158	1300	0	0	0	107.16	0			1000	0.446	12.743	0.158	1300	0	0	0	107.16	0				1000	0.465	12.743	0.163	1300	0	0	0	107.16	0						0.002
	1050	0.44	13.386	1.058	1300	0	0	0	110.69	0			1050	0.44	13.386	1.058	1300	0	0	0	110.69	0				1050	0.458	13.387	1.088	1300	0	0	0	110.69	0						0.00217
	1100	0.433	14.03	1.058	1300	0	0	0	115.84	0			1100	0.433	14.03	1.058	1300	0	0	0	115.84	0				1100	0.451	14.031	1.088	1300	0	0	0	115.84	0						0.00228
	1150	0.426	14.674	1.058	1300	0	0	0	120.69	0			1150	0.426	14.674	1.058	1300	0	0	0	120.69	0				1150	0.444	14.675	1.088	1300	0	0	0	120.69	0						0.00239
	1200	0.42	15.317	1.058	1300	0	0	0	125.48	0			1200	0.42	15.317	1.058	1300	0	0	0	125.48	0				1200	0.437	15.319	1.088	1300	0	0	0	125.48	0						0.00249
	1250	0.413	15.961	1.058	1300	0	0	0	130.04	0			1250	0.413	15.961	1.058	1300	0	0	0	130.04	0				1250	0.43	15.963	1.088	1300	0	0	0	130.04	0						0.00259
	1300	0.406	16.605	1.058	1300	0	0	0	134.54	0			1300	0.406	16.605	1.058	1300	0	0	0	134.54	0				1300	0.423	16.607	1.088	1300	0	0	0	134.54	0						0.00268
	1350	0.4	17.248	1.058	1300	0	0	0	138.75	0			1350	0.4	17.248	1.058	1300	0	0	0	138.75	0				1350	0.416	17.251	1.088	1300	0	0	0	138.75	0						0.00278
	1400	0.393	17.892	1.058	1300	0	0	0	142.8	0			1400	0.393	17.892	1.058	1300	0	0	0	142.8	0				1400	0.409	17.895	1.088	1300	0	0	0	142.8	0						0.00288
	1450	0.386	18.536	1.058	1300	0	0	0	146.7	0			1450	0.386	18.536	1.058	1300	0	0	0	146.7	0				1450	0.402	18.539	1.088	1300	0	0	0	146.7	0						0.00297
	1500	0.38	19.179	1.058	1300	0	0	0	150.45	0			1500	0.38	19.179	1.058	1300	0	0	0	150.45	0				1500	0.395	19.183	1.088	1300	0	0	0	150.45	0						0.00306
	1550	0.373	19.823	1.058	1300	0	0	0	154.1	0			1550	0.373	19.823	1.058	1300	0	0	0	154.1	0				1550	0.388	19.827	1.088	1300	0	0	0	154.1	0						0.00316
	1600	0.366	20.467	1.058	1300	0	0	0	157.62	0			1600	0.366	20.467	1.058	1300	0	0	0	157.62	0				1600	0.381	20.471	1.088	1300	0	0	0	157.62	0						0.00325
	1650	0.36	21.11	1.058	1300	0	0	0	161	0			1650	0.36	21.11	1.058	1300	0	0	0	161	0				1650	0.374	21.115	1.088	1300	0	0	0	161	0						0.00334
	1700	0.353	21.754	1.058	1300	0	0	0	164.25	0			1700	0.353	21.754	1.058	1300	0	0	0	164.25	0				1700	0.367	21.759	1.088	1300	0	0	0	164.25	0						0.00343
	1750	0.346	22.398	1.058	1300	0	0	0	167.37	0			1750	0.346	22.398	1.058	1300	0	0	0	167.37	0				1750	0.36	22.403	1.088	1300	0	0	0	167.37	0						0.00352
	1800	0.34	23.041	1.058	1300	0	0	0	170.28	0			1800	0.34	23.041	1.058	1300	0	0	0	170.28	0				1800	0.353	23.047	1.088	1300	0	0	0	170.28	0						0.00361
	1850	0.333	23.685	1.058	1300	0	0	0	173.08	0			1850	0.333	23.685	1.058	1300	0	0	0	173.08	0				1850	0.346	23.691	1.088	1300	0	0	0	173.08	0						0.00371
	1900	0.326	24.329	1.058	1300	0	0	0	175.77	0			1900	0.326	24.329	1.058	1300	0	0	0	175.77	0				1900	0.339	24.335	1.088	1300	0	0	0	175.77	0						0.0038
	1950	0.319	24.973	1.058	1300	0	0	0	178.36	0			1950	0.319	24.973	1.058	1300	0	0	0	178.36	0				1950	0.332	24.979	1.088	1300	0	0	0	178.36	0						0.00389
	2000	0.313	25.616	1.058	1300	0	0	0	180.85	0			2000	0.313	25.616	1.058	1300	0	0	0	180.85	0				2000	0.325	25.623	1.088	1300	0	0	0	180.85	0						0.00398
	2050	0.306	26.26	1.058	1300	0	0	0	183.25	0			2050	0.306	26.26	1.058	1300	0	0	0	183.25	0				2050	0.318	26.267	1.088	1300	0	0	0	183.25	0						0.00407
	2100	0.299	26.904	1.058	1300	0	0	0	185.66	0			2100	0.299	26.904	1.058	1300	0	0	0	185.66	0				2100	0.311	26.911	1.088	1300	0	0	0	185.66	0						0.00416
	2150	0.293	27.547	1.058	1300	0	0	0	187.99	0			2150	0.293	27.547	1.058	1300	0	0	0	187.99	0				2150	0.304	27.555	1.088	1300	0	0	0	187.99	0						0.00425
	2200	0.286	28.191	1.058	1300	0	0	0	190.23	0			2200	0.286	28.191	1.058	1300	0	0	0	190.23	0				2200	0.297	28.199	1.088	1300	0	0	0	190.23	0						0.00434
	2250	0.279	28.835	1.058	1300	0	0	0	192.31	0			2250	0.279	28.835	1.058	1300	0	0	0	192.31	0				2250	0.29	28.843	1.088	1300	0	0	0	192.31	0						0.00443
	2300	0.273	29.478	1.058	1300	0	0	0	194.41	0			2300	0.273	29.478	1.058	1300	0	0	0	194.41	0				2300	0.283	29.487	1.088	1300	0	0	0	194.41	0						0.00452
	2350	0.266	30.122	1.058	1300	0	0	0	196.53	0			2350	0.266	30.122	1.058	1300	0	0	0	196.53	0				2350	0.276	30.131	1.088	1300	0	0	0	196.53	0						0.00461
	2400	0.259	30.766	1.058	1300	0	0	0	198.49	0			2400	0.259	30.766	1.058	1300	0	0	0	198.49	0				2400	0.269	30.775	1.088	1300	0	0	0	198.49	0						0.0047
	2450	0.253	31.409	1.058	1300	0	0	0	200.3	0			2450	0.253	31.409	1.058	1300	0	0	0	200.3	0				2450	0.262	31.419	1.088	1300	1.448	0	0	200.3	0						0.00479
	2500	0.246	32.053	1.058	1300	0	0	0	202.15	0			2500	0.246	32.053	1.058	1300	0	0	0	202.15	0				2500	0.255	32.063	1.088	1300	1.447	0	0	202.15	0						0.00488
	2550	0.239	32.697	1.058	1300	0	0	0	204.02	0			2550	0.239	32.697	1.058	1300	0	0	0	204.02	0				2550	0.248	32.707	1.088	1300	1.446	0	0	204.02	0						0.00497
	2600	0.233	33.341	1.058	1300	0	0	0	205.84	0			2600	0.233	33.341	1.058	1300	0	0	0	205.84	0				2600	0.241	33.351	1.088	1300	1.445	0	0	205.84	0						0.00506
	2650	0.226	33.984	1.058	1300	0	0	0	207.61	0			2650	0.226	33.984	1.058	1300	0	0	0	207.61	0				2650	0.234	33.995	1.088	1299.99	1.444	0	0	207.61	0						0.00515
	2700	0.219	34.628	1.058	1300	0	0	0	209.33	0			2700	0.219	34.628	1.058	1300	0	0	0	209.33	0				2700	0.227	34.639	1.088	1299.99	1.444	0	0	209.33	0						0.00525
	2750	0.213	35.272	1.058	1300	0	0	0	211.01	0			2750	0.213	35.272	1.058	1300	0	0	0	211.01	0				2750	0.22	35.283	1.088	1299.97	1.443	0	0	211.01	0						0.00534
	2800	0.206	35.915	1.058	1300	0	0	0.00911	212.63	0		0	2800	0.206	35.915	1.058	1300	0	0	0	212.63	0				2800	0.213	35.927	1.088	1299.95	1.442	0	0	212.63	0						0.00543
	2850	0.199	36.559	1.058	1300	0	0	0.00927	214.21	0	0	0	2850	0.199	36.559	1.058	1300	0	0	0	214.21	0	0	0	0	2850	0.206	36.571	1.088	1299.91	1.441	0	0	214.21	0						0.00553
	2900	0.192	37.203	1.058	1300	0	0	0.00943	215.84	0	0	0	2900	0.192	37.203	1.058	1300	0	0	0	215.84	0	0	0	0	2900	0.199	37.215	1.088	1299.83	1.44	0	0	215.84	0	0	0	0			0.00562
	2950	0.186	37.847	1.058	1300	0	0	0.00959	217.34	0	0	0	2950	0.186	37.847	1.058	1300	0	0	0	217.34	0	0	0	0	2950	0.192	37.859	1.088	1299.69	1.439	0	0.00571	217.34	0	0	8.89864	8.89864			0.00571
	3000	0.179	38.49	1.058	1300	0	0	0.00975	218.88	0.01367	0	0	3000	0.179	38.49	1.058	1300	0	0	0	218.88	0	0	0	0	3027	0.185	38.503	1.088	1299.47	1.438	0.0466831	0.00581	218.88	0.0662331	14.4971	8.45477	22.9519			0.00581
	3050	0.172	39.134	1.058	1300	0	0	0.00991	220.55	0.01367	0	25.2132	3050	0.172	39.134	1.058	1300	0	0.00927749	0.00991	220.55	0.0131627	2.90304	18.2782	21.1812	3050	0.178	39.146	1.088	1299.09	1.438	0.0457991	0.0059	220.55	0.0649789	14.3311	8.59727	22.9284			0.0059
	3100	0.166	39.778	1.058	1300	0	0	0.01007	222.18	0.01367	0	25.2132	3100	0.166	39.778	1.058	1300	0	0.021064	0.01007	222.18	0.0298852	6.63989	18.5733	25.2132	3100	0.171	39.79	1.088	1298.51	1.437	0.044878	0.006	222.18	0.0636721	14.1467	8.75521	22.9019			0.006
	3150	0.159	40.422	1.058	1300	0	0	0.01023	223.77	0.01367	0	25.2132	3150	0.159	40.422	1.058	1300	0	0.0199848	0.01023	223.77	0.0283541	6.34479	18.8684	25.2132	3150	0.164	40.433	1.087	1297.64	1.436	0.0439782	0.0061	223.77	0.0623954	13.9622	8.91327	22.8755			0.0061
	3200	0.152	41.065	1.058	1300	0	0	0.01039	225.33	0.01367	0	25.2132	3200	0.152	41.065	1.058	1300	0	0.0189234	0.01039	225.33	0.0268481	6.04968	19.1635	25.2132	3200	0.157	41.075	1.087	1296.39	1.435	0.0430968	0.0062	225.33	0.0611449	13.7778	9.07147	22.8493			0.0062
	3250	0.146	41.709	1.058	1300	0	0	0.01055	226.85	0.01367	0	25.2132	3250	0.146	41.709	1.058	1300	0	0.0178797	0.01055	226.85	0.0253673	5.75458	19.4586	25.2132	3250	0.15	41.717	1.087	1294.71	1.434	0.0422923	0.00629	226.85	0.0600035	13.6118	9.21434	22.8261			0.00629
	3300	0.139	42.353	1.058	1300	0	0	0.01072	228.42	0.01367	0	25.2132	3300	0.139	42.353	1.058	1300	0	0.0167892	0.01072	228.42	0.0238203	5.44102	19.7721	25.2132	3300	0.143	42.358	1.086	1292.71	1.433	0.0414324	0.00639	228.42	0.0587836	13.4273	9.37298	22.8003			0.00639
	3350	0.13	42.999	1.167	1300	0	0	0.01089	229.96	0.01367	0	25.2132	3350	0.13	42.999	1.167	1300	0	0.0157158	0.01089	229.96	0.0222972	5.12747	20.0857	25.2132	3350	0.134	43	1.198	1290.3	1.567	0.0405331	0.0065	229.96	0.0575076	13.2245	9.54726	22.7717			0.0065
	3400	0.121	43.645	1.167	1300	0	0	0.01106	231.62	0.01367	0	25.2132	3400	0.121	43.645	1.167	1300	0	0.014649	0.01106	231.62	0.0207837	4.81392	20.3992	25.2132	3400	0.124	43.642	1.197	1287.91	1.566	0.0396814	0.0066	231.62	0.0562992	13.04	9.70657	22.7466			0.0066
	3450	0.111	44.291	1.167	1300	0	0	0.01123	233.24	0.01367	0.01367	25.2132	3450	0.111	44.291	1.167	1300	0	0.0135997	0.01123	233.24	0.019295	4.50037	20.7128	25.2132	3450	0.115	44.282	1.196	1285.56	1.565	0.0388484	0.0067	233.24	0.0551174	12.8556	9.86598	22.7215			0.0067
	3500	0.102	44.938	1.167	1300	0	0	0.01141	234.87	0.01367	0.01367	25.2132	3500	0.102	44.938	1.167	1300	0	0.012509	0.01141	234.87	0.0177476	4.16838	21.0448	25.2132	3500	0.105	44.921	1.195	1283.46	1.564	0.0379699	0.00681	234.87	0.053871	12.6527	10.0412	22.6939			0.00681
	3550	0.093	45.584	1.167	1300	0	0	0.01158	236.48	0.01367	0.01367	25.2132	3550	0.093	45.584	1.167	1300	0	0.0114893	0.01158	236.48	0.0163009	3.85483	21.3583	25.2132	3550	0.096	45.559	1.195	1281.74	1.563	0.0370673	0.00692	236.48	0.0525904	12.4366	10.2172	22.6538			0.00692
	3600	0.084	46.23	1.167	1300	0	0	0.01176	238.11	0.01367	0.01367	25.2132	3600	0.084	46.23	1.167	1300	0	0.010428	0.01176	238.11	0.010428	2.483	21.6903	24.1733	3600	0.086	46.196	1.194	1280.47	1.562	0.0363067	0.00702	238.11	0.0515113	12.2654	10.3766	22.642			0.00702
	3650	0.074	46.876	1.167	1300	0	0	0.01193	239.78	0.01367	0.01367	25.2132	3650	0.074	46.876	1.167	1300	0	0.00943365	0.01193	239.78	0.00943365	2.262	22.0039	24.2659	3650	0.077	46.833	1.194	1279.62	1.56	0.034975	0.00713	239.78	0.0496219	11.8983	10.5602	22.4586			0.00713
	3700	0.065	47.522	1.167	1300	0	0	0.01211	241.4	0.01367	0.01367	25.2132	3700	0.065	47.522	1.167	1300	0	0.00840099	0.01211	241.4	0.00840099	2.028	22.3359	24.3639	3700	0.067	47.469	1.193	1279.09	1.559	0.0341373	0.00724	241.4	0.0484334	11.6918	10.7366	22.4284			0.00724
	3750	0.056	48.169	1.167	1300	0	0	0.01229	242.97	0.01367	0.01367	25.2132	3750	0.056	48.169	1.167	1300	0	0.00728363	0.01229	242.97	0.00738363	1.794	22.6679	24.4619	3750	0.058	48.105	1.193	1278.81	1.558	0.0328115	0.00735	242.97	0.0465523	11.3108	10.9212	22.232			0.00735
	3800	0.041	48.821	1.408	1300	0	0	0.01249	244.55	0.01367	0.01367	21.3037	3800	0.041	48.821	1.408	1300	0	0.00627275	0.01249	244.55	0.00627275	1.534	19.4648	20.9988	3800	0.042	48.747	1.44	1278.37	1.853	0.0329585	0.00747	244.55	0.0395104	9.66227	11.1815	20.8438			0.00747
	3850	0.031	49.468	1.252	1300	0	0	0.01268	246.22	0.01367	0.01367	21.3037	3850	0.031	49.468	1.252	1300	0	0.00522703	0.01268	246.22	0.00522703	1.287	19.7609	21.0479	3850	0.032	49.384	1.279	1278.39	1.659	0.0321014	0.00759	246.22	0.0384829	9.47526	11.3733	20.8485			0.00759
	3900	0.02	50.115	1.252	1300	0	0	0.01287	247.93	0.01367	0.01367	21.3037	3900	0.02	50.115	1.252	1300	0	0.00419473	0.01287	247.93	0.00419473	1.04	20.057	21.097	3900	0.021	50.021	1.279	1278.23	1.657	0.0313032	0.0077	247.93	0.037526	9.30383	11.5496	20.8534			0.0077
	3950	0.01	50.762	1.252	1300	0	0	0.01306	249.62	0.01367	0.01367	21.3037	3950	0.01	50.762	1.252	1300	0	0.00317683	0.01306	249.62	0.00317683	0.793	20.3531	21.1461	3950	0.01	50.658	1.279	1278.04	1.656	0.0304663	0.00782	249.62	0.0365228	9.11682	11.7418	20.8586			0.00782
	4000	0	51.384	1.252	1300	0	0	0.01324	251.55	0.01367	0.01367	21.3037	4000	0	51.384	1.252	1300	0	0.00222222	0.01324	251.55	0.00222222	0.559	20.6336	21.1926	4000	0	51.269	1.279	1277.88	1.654	0.0296641	0.00793	251.55	0.0355611	8.94539	11.9189	20.8643			0.00793
			3000	47.259			0																										A1	0.0283756	0.545301	255.633	221.016	476.649
			3050	47.259			0											A1	0.0283756						476.06								A2	0.0239758
			3100	47.259			0					261.707						A2	0.0239758																0.01367	0.0823341	25.2132
			3150	47.259			0			0.10936		484.716								2950	0.01367	0.0817659	25.2132							3050	34.7705			2950	0.01367	0.047612	14.6815
			3200	47.259	A1	0.0283756														3000	0.01367	0.0811906	25.2132							3100	34.7947			3000	0.01367	1518.25	471483
			3250	47.259	A2	0.0239758														3050	0.01367	0.0221628	6.935							3150	34.8189			3050	0.01367	0.0457991	14.3311
			3300	47.259																3100	0.01367	0.021064	6.63989							3200	34.8432			3100	0.01367	0.044878	14.1467
			3350	42.8449																3150	0.01367	0.0199848	6.34479							3250	34.8675			3150	0.01367	0.0439782	13.9622
			3400	42.8449																3200	0.01367	0.0189234	6.04968							3300	34.8918			3200	0.01367	0.0430968	13.7778
			3450	42.8449																3250	0.01367	0.0178797	5.75458							3350	31.9081			3250	0.01367	0.0422923	13.6118
			3500	42.8449																3300	0.01367	0.0167892	5.44102							3400	31.9285			3300	0.01367	0.0414324	13.4273
			3550	42.8449																3350	0.01367	0.0157158	5.12747							3450	31.9489			3350	0.01367	0.0405331	13.2245
			3600	42.8449																3400	0.01367	0.014649	4.81392							3500	31.9693			3400	0.01367	0.0396814	13.04
			3650	42.8449																3450	0.01367	0.0135997	4.50037							3550	31.9898			3450	0.01367	0.0388484	12.8556
			3700	42.8449																3500	0.01367	0.012509	4.16838							3600	32.0102			3500	0.01367	0.0379699	12.6527
			3750	42.8449																3550	0.01367	0.0114893	3.85483							3650	32.0513			3550	0.01367	0.0371067	12.4498
			3800	35.5114																3600	0.01367	0.010428	3.52283							3700	32.0718			3600	0.01367	0.0363067	12.2654
			3850	39.9361																3650	0.01367	0.00943365	3.20928							3750	32.0924			3650	0.01367	0.0354575	12.0625
			3900	39.9361																3700	0.01367	0.00840099	2.87729							3800	26.9833			3700	0.01367	0.0346272	11.8596
			3950	39.9361																3750	0.01367	0.00738363	2.54529							3850	30.1386			3750	0.01367	0.0338149	11.6567
			4000	39.9361																3800	0.01367	0.00627275	1.83895							3900	30.175			3800	0.01367	0.0329585	9.66227
																				3850	0.01367	0.00522703	1.54285							3950	30.1932			3850	0.01367	0.0321014	9.47526
																				3900	0.01367	0.00419473	1.24674							4000	30.2297			3900	0.01367	0.0313032	9.30383
			493.8	495.17																3950	0.01367	0.00317683	0.950642											3950	0.01367	0.0304663	9.11682
			14.4069	864.414																4000	0.01367	0.00222222	0.670125								644.677			4000	0.01367	0.0296641	8.94539

## Sheet: 同时考虑溶解悬浮
0.2	476kg															0.1	476kg
井深m	环空压耗	环空压力	泥浆流速m/s	平均密度	实际气速	自由气VF	溶解气wc	气体密度	悬浮气VF	运移气体体积	悬浮气体积	运移气质量	自由气质量	溶解气总质量	侵入气总质量	井深m	环空压耗	环空压力	泥浆流速m/s	平均密度	实际气速	自由气VF	溶解气wc	气体密度	悬浮气VF	运移气体VF	悬浮气体积	运移气体积	自由气质量	溶解气总质量	侵入气总质量
0	0.449	0	0.158	1300	0	0	0	0.68051		0						0	0.468	0	0.163	1300	0	0	0	0.68051		0
50	0.449	0.637	0.158	1300	0	0	0	5.0864		0						50	0.467	0.637	0.163	1300	0	0	0	5.0864		0
100	0.449	1.274	0.158	1300	0	0	0	9.6243		0						100	0.467	1.274	0.163	1300	0	0	0	9.6243		0
150	0.449	1.911	0.158	1300	0	0	0	14.301		0						150	0.467	1.911	0.163	1300	0	0	0	14.301		0
200	0.449	2.549	0.158	1300	0	0	0	19.148		0						200	0.467	2.549	0.163	1300	0	0	0	19.148		0
250	0.448	3.186	0.158	1300	0	0	0	24.162		0						250	0.467	3.186	0.163	1300	0	0	0	24.162		0
300	0.448	3.823	0.158	1300	0	0	0	29.34		0						300	0.467	3.823	0.163	1300	0	0	0	29.34		0
350	0.448	4.46	0.158	1300	0	0	0	34.714		0						350	0.467	4.46	0.163	1300	0	0	0	34.714		0
400	0.448	5.097	0.158	1300	0	0	0	40.25		0						400	0.466	5.097	0.163	1300	0	0	0	40.25		0
450	0.448	5.734	0.158	1300	0	0	0	45.951		0						450	0.466	5.734	0.163	1300	0	0	0	45.951		0
500	0.448	6.371	0.158	1300	0	0	0	51.869		0						500	0.466	6.371	0.163	1300	0	0	0	51.869		0
550	0.448	7.009	0.158	1300	0	0	0	57.895		0						550	0.466	7.009	0.163	1300	0	0	0	57.895		0
600	0.447	7.646	0.158	1300	0	0	0	64.071		0						600	0.466	7.646	0.163	1300	0	0	0	64.071		0
650	0.447	8.283	0.158	1300	0	0	0	70.404		0						650	0.466	8.283	0.163	1300	0	0	0	70.404		0
700	0.447	8.92	0.158	1300	0	0	0	76.695		0						700	0.466	8.92	0.163	1300	0	0	0	76.695		0
750	0.447	9.557	0.158	1300	0	0	0	83.009		0						750	0.465	9.557	0.163	1300	0	0	0	83.009		0
800	0.447	10.194	0.158	1300	0	0	0	89.173		0						800	0.465	10.194	0.163	1300	0	0	0	89.173		0
850	0.447	10.831	0.158	1300	0	0	0	95.035		0						850	0.465	10.831	0.163	1300	0	0	0	95.035		0
900	0.447	11.468	0.158	1300	0	0	0	100.05		0						900	0.465	11.469	0.163	1300	0	0	0	100.05		0
950	0.447	12.106	0.158	1300	0	0	0	104.19		0						950	0.465	12.106	0.163	1300	0	0	0	104.19		0
1000	0.446	12.743	0.158	1300	0	0	0	107.16		0						1000	0.465	12.743	0.163	1300	0	0	0	107.16		0
1050	0.44	13.386	1.058	1300	0	0	0	110.69		0						1050	0.458	13.387	1.088	1300	0	0	0	110.69		0
1100	0.433	14.03	1.058	1300	0	0	0	115.84		0						1100	0.451	14.031	1.088	1300	0	0	0	115.84		0
1150	0.426	14.674	1.058	1300	0	0	0	120.69		0						1150	0.444	14.675	1.088	1300	0	0	0	120.69		0
1200	0.42	15.317	1.058	1300	0	0	0	125.48		0						1200	0.437	15.319	1.088	1300	0	0	0	125.48		0
1250	0.413	15.961	1.058	1300	0	0	0	130.04		0						1250	0.43	15.963	1.088	1300	0	0	0	130.04		0
1300	0.406	16.605	1.058	1300	0	0	0	134.54		0						1300	0.423	16.607	1.088	1300	0	0	0	134.54		0
1350	0.4	17.248	1.058	1300	0	0	0	138.75		0						1350	0.416	17.251	1.088	1300	0	0	0	138.75		0
1400	0.393	17.892	1.058	1300	0	0	0	142.8		0						1400	0.409	17.895	1.088	1300	0	0	0	142.8		0
1450	0.386	18.536	1.058	1300	0	0	0	146.7		0						1450	0.402	18.539	1.088	1300	0	0	0	146.7		0
1500	0.38	19.179	1.058	1300	0	0	0	150.45		0						1500	0.395	19.183	1.088	1300	0	0	0	150.45		0
1550	0.373	19.823	1.058	1300	0	0	0	154.1		0						1550	0.388	19.827	1.088	1300	0	0	0	154.1		0
1600	0.366	20.467	1.058	1300	0	0	0	157.62		0						1600	0.381	20.471	1.088	1300	0	0	0	157.62		0
1650	0.36	21.11	1.058	1300	0	0	0	161		0						1650	0.374	21.115	1.088	1300	0	0	0	161		0
1700	0.353	21.754	1.058	1300	0	0	0	164.25		0						1700	0.367	21.759	1.088	1300	0	0	0	164.25		0
1750	0.346	22.398	1.058	1300	0	0	0	167.37		0						1750	0.36	22.403	1.088	1300	0	0	0	167.37		0
1800	0.34	23.041	1.058	1300	0	0	0	170.28		0						1800	0.353	23.047	1.088	1300	0	0	0	170.28		0
1850	0.333	23.685	1.058	1300	0	0	0	173.08		0						1850	0.346	23.691	1.088	1300	0	0	0	173.08		0
1900	0.326	24.329	1.058	1300	0	0	0	175.77		0						1900	0.339	24.335	1.088	1300	0	0	0	175.77		0
1950	0.319	24.973	1.058	1300	0	0	0	178.36		0						1950	0.332	24.979	1.088	1300	0	0	0	178.36		0
2000	0.313	25.616	1.058	1300	0	0	0	180.85		0						2000	0.325	25.623	1.088	1300	0	0	0	180.85		0
2050	0.306	26.26	1.058	1300	0	0	0	183.25		0						2050	0.318	26.267	1.088	1300	0	0	0	183.25		0
2100	0.299	26.904	1.058	1300	0	0	0	185.66		0						2100	0.311	26.911	1.088	1300	0	0	0	185.66		0
2150	0.293	27.547	1.058	1300	0	0	0	187.99		0						2150	0.304	27.555	1.088	1300	0	0	0	187.99		0
2200	0.286	28.191	1.058	1300	0	0	0	190.23		0						2200	0.297	28.199	1.088	1300	0	0	0	190.23		0
2250	0.279	28.835	1.058	1300	0	0	0	192.31		0						2250	0.29	28.843	1.088	1300	0	0	0	192.31		0
2300	0.273	29.478	1.058	1300	0	0	0	194.41		0						2300	0.283	29.487	1.088	1300	0	0	0	194.41		0
2350	0.266	30.122	1.058	1300	0	0	0	196.53		0						2350	0.276	30.131	1.088	1300	0	0	0	196.53		0
2400	0.259	30.766	1.058	1300	0	0	0	198.49		0						2400	0.269	30.775	1.088	1300	0	0	0	198.49		0
2450	0.253	31.409	1.058	1300	0	0	0	200.3		0						2450	0.262	31.419	1.088	1300	1.448	0	0	200.3		0
2500	0.246	32.053	1.058	1300	0	0	0	202.15		0						2500	0.255	32.063	1.088	1300	1.447	0	0	202.15		0
2550	0.239	32.697	1.058	1300	0	0	0	204.02		0						2550	0.248	32.707	1.088	1300	1.446	0	0	204.02		0
2600	0.233	33.341	1.058	1300	0	0	0	205.84		0						2600	0.241	33.351	1.088	1300	1.445	0	0	205.84		0
2650	0.226	33.984	1.058	1300	0	0	0	207.61		0						2650	0.234	33.995	1.088	1299.99	1.444	0	0	207.61	0	0
2700	0.219	34.628	1.058	1300	0	0	0	209.33		0						2700	0.227	34.639	1.088	1299.99	1.444	0	0	209.33	0	0
2750	0.213	35.272	1.058	1300	0	0	0	211.01		0						2750	0.22	35.283	1.088	1299.97	1.443	0	0	211.01	0	0
2800	0.206	35.915	1.058	1300	0	0	0	212.63		0						2800	0.213	35.927	1.088	1299.95	1.442	0	0	212.63	0	0
2850	0.199	36.559	1.058	1300	0	0	0	214.21	0	0		0			0	2850	0.206	36.571	1.088	1299.91	1.441	0	0	214.21	0	0					0
2900	0.192	37.203	1.058	1300	0	0	0	215.84	0	0		0			0	2900	0.199	37.215	1.088	1299.83	1.44	0	0	215.84	0	0					0
2950	0.186	37.847	1.058	1300	0	0	0	217.34	0	0		0			0	2950	0.192	37.859	1.088	1299.69	1.439	0	0	217.34	0	0					0
3044	0.179	38.49	1.058	1300	0	0	0	218.88	0	0		0			0	3000	0.185	38.503	1.088	1299.47	1.438	0	0	218.88	0	0			0		0
3100	0.172	39.134	1.058	1300	0	0	0.00991	220.55	0	0	0	0	0	18.2782	18.2782	3050	0.178	39.146	1.088	1299.09	1.438	0	0	220.55	0	0	0	0	0	0	0
3100	0.166	39.778	1.058	1300	0	0.021064	0.01007	222.18	0.021064	0	0.0298852	0	6.63989	18.182	24.8219	3100	0.171	39.79	1.088	1298.51	1.437	0	0	222.18	0	0	0	0	0	0	0
3150	0.159	40.422	1.058	1300	0	0.0213501	0.01023	223.77	0.0213501	0	0.0302911	0	6.77824	18.4655	25.2438	3140	0.164	40.433	1.087	1297.64	1.436	0.0257133	0.0061	223.77	0.0257133	0	0.0364815	0	8.16346	10.9616	19.1251
3200	0.152	41.065	1.058	1300	0	0.020234	0.01039	225.33	0.020234	0	0.0287076	0	6.46869	18.7757	25.2444	3200	0.157	41.075	1.087	1296.39	1.435	0.0527849	0.0062	225.33	0.0317984	0.0209866	0.0451149	0.0297754	16.875	10.8318	27.7068
3250	0.146	41.709	1.058	1300	0	0.0191358	0.01055	226.85	0.0191358	0	0.0271495	0	6.15886	19.0862	25.2451	3250	0.15	41.717	1.087	1294.71	1.434	0.0519843	0.00629	226.85	0.0317696	0.0202147	0.0450741	0.0286802	16.7312	10.9983	27.7294
3300	0.139	42.353	1.058	1300	0	0.0179875	0.01072	228.42	0.0179875	0	0.0255203	0	5.82935	19.4165	25.2458	3300	0.143	42.358	1.086	1292.71	1.433	0.0510745	0.00639	228.42	0.0317398	0.0193346	0.0450318	0.0274316	16.5521	11.1839	27.736
3350	0.13	42.999	1.167	1300	0	0.0168561	0.01089	229.96	0.0168561	0	0.0239151	0	5.49951	19.7471	25.2466	3350	0.134	43	1.198	1290.3	1.567	0.0501246	0.0065	229.96	0.0317108	0.0184138	0.0449907	0.0261252	16.3538	11.3878	27.7416
3400	0.121	43.645	1.167	1300	0	0.0157299	0.01106	231.62	0.0157299	0	0.0223173	0	5.16912	20.0784	25.2475	3400	0.124	43.642	1.197	1287.91	1.566	0.0493863	0.0066	231.62	0.0316793	0.017707	0.044946	0.0251223	16.2292	11.572	27.8012
3450	0.111	44.291	1.167	1300	0	0.0146213	0.01123	233.24	0.0146213	0	0.0207444	0	4.83843	20.4099	25.2484	3450	0.115	44.282	1.196	1285.56	1.565	0.0485585	0.0067	233.24	0.0316483	0.0169102	0.044902	0.0239919	16.0688	11.7575	27.8263
3500	0.102	44.938	1.167	1300	0	0.0134682	0.01141	234.87	0.0134682	0	0.0191084	0	4.488	20.7613	25.2493	3500	0.105	44.921	1.195	1283.46	1.564	0.0476166	0.00681	234.87	0.0316171	0.0159994	0.0448578	0.0226997	15.8672	11.9624	27.8296
3550	0.093	45.584	1.167	1300	0	0.0123888	0.01158	236.48	0.0123888	0	0.0175769	0	4.15659	21.0937	25.2503	3550	0.096	45.559	1.195	1281.74	1.563	0.0466814	0.00692	236.48	0.0315859	0.0150955	0.0448135	0.0214171	15.6622	12.1675	27.8298
3600	0.084	46.23	1.167	1300	0	0.0112643	0.01176	238.11	0.0112643	0	0.0159816	0	3.80539	21.446	25.2514	3600	0.086	46.196	1.194	1280.47	1.562	0.0458079	0.00702	238.11	0.0315537	0.0142541	0.0447678	0.0202235	15.4751	12.3547	27.8298
3650	0.074	46.876	1.167	1300	0	0.0102095	0.01193	239.78	0.0102095	0	0.0144851	0	3.47323	21.7792	25.2525	3650	0.077	46.833	1.194	1279.62	1.56	0.0448842	0.00713	239.78	0.03152	0.0133642	0.04472	0.0189608	15.2694	12.5604	27.8298
3700	0.065	47.522	1.167	1300	0	0.00911346	0.01211	241.4	0.00911346	0	0.01293	0	3.1213	22.1323	25.2536	3700	0.067	47.469	1.193	1279.09	1.559	0.043982	0.00724	241.4	0.031486	0.012496	0.0446718	0.0177291	15.0636	12.7662	27.8298
3750	0.056	48.169	1.167	1300	0	0.0080261	0.01229	242.97	0.0080261	0	0.0113873	0	2.76677	22.4859	25.2695	3750	0.058	48.105	1.193	1278.81	1.558	0.0431	0.00735	242.97	0.0314526	0.0116474	0.0446244	0.0165251	14.8575	12.9722	27.8297
3800	0.041	48.821	1.408	1300	0	0.0068517	0.01249	244.55	0.0068517	0	0.00821376	0	2.00868	19.3314	21.3401	3800	0.042	48.747	1.44	1278.37	1.853	0.045217	0.00747	244.55	0.031419	0.013798	0.0376648	0.0165409	13.256	11.1151	24.3711
3850	0.031	49.468	1.252	1300	0	0.00573834	0.01268	246.22	0.00573834	0	0.00687908	0	1.69377	19.6475	21.3413	3850	0.032	49.384	1.279	1278.39	1.659	0.0447709	0.00759	246.22	0.0313849	0.013386	0.037624	0.0160471	13.2149	11.2989	24.5138
3900	0.02	50.115	1.252	1300	0	0.00463806	0.01287	247.93	0.00463806	0	0.00556007	0	1.37851	19.964	21.3425	3900	0.021	50.021	1.279	1278.23	1.657	0.0444005	0.0077	247.93	0.0313512	0.0130493	0.0375836	0.0156433	13.1966	11.4671	24.6637
3950	0.01	50.762	1.252	1300	0	0.00355207	0.01306	249.62	0.00355207	0	0.0042582	0	1.06293	20.2808	21.3437	3950	0.01	50.658	1.279	1278.04	1.656	0.044012	0.00782	249.62	0.0313184	0.0126936	0.0375443	0.015217	13.1703	11.6506	24.8208
4000	0	51.384	1.252	1300	0	0.00253222	0.01324	251.55	0.00253222	0	0.00303561	0	0.763607	20.5814	21.345	4000	0	51.269	1.279	1277.88	1.654	0.0436641	0.00793	251.55	0.0312816	0.0123825	0.0375001	0.014844	13.1672	11.8187	24.9859
									0.0224022						478.061																476
									0.0213521													3050	0			A1	0.0283756
	A1	0.0283756							0.0202361													3100	0.0606713			A2	0.0239758
	A2	0.0239758							0.0191381													3150	0.0527438
									0.0179899													3200	0.0528558
									0.0168587													3250	0.0520045
									0.0157326													3300	0.0510918
									0.0146243													3350	0.0503073
									0.0134711													3400	0.0494628
									0.0123919													3450	0.0485684
									0.0112675													3500	0.047617
									0.0102129													3550	0.0466814
									0.00911078													3600	0.045808
									0.00807493													3650	0.0448842
									0.00685567													3700	0.0439815
									0.00574245													3750	0.0431
									0.00464228													3800
									0.00355622													3850	0.0457037
																						3900	0.0452787
																						3950	0.0449293
																						4000	0.0445637
