# Supplementary material for: A drilling wellbore pressure calculation model considering the effect of gas dissolution and suspension
Source: Frontiers journal article supplement (doi:10.3389/feart.2022.993876), 2022-09-27
Supplement: Data_Sheet_3.xlsx [file Data_Sheet_3.xlsx]

## Sheet: 不考虑气体溶解悬浮
	8min	2m3														18											28											38min											68
密度	井深m	环空压耗	环空压力	泥浆流速m/s	平均密度	实际气速	自由气VF	溶解气wc	气体密度	体积误差1	运移气体体积	运移气质量	悬浮气质量	总气体积分数	气体质量	井深m	环空压耗	环空压力	泥浆流速m/s	平均密度	实际气速	自由气VF	溶解气wc	气体密度	气体体积	气体质量	井深m	环空压耗	环空压力	泥浆流速m/s	平均密度	实际气速	自由气VF	溶解气wc	气体密度	气体体积		井深m	环空压耗	环空压力	泥浆流速m/s	平均密度	实际气速	自由气VF	溶解气wc	气体密度			井深m
	0	0.547	0	0.182	1300	0	0	0	0.68051	0.1						0	0	4.009	0	1030	0	0	0	30.423			0	0	4.981	0	1030	0	0	0	38.402			0	0	5.725	0	1030	0	0	0	44.715	0		0
	50	0.547	0.637	0.182	1300	0	0	0	5.0864	0.737						50	0	4.513	0	1030	0	0	0	34.563			50	0	5.486	0	1030	0	0	0	42.722			50	0	6.23	0	1030	0	0	0	49.167	0		50
	100	0.547	1.274	0.182	1300	0	0	0	9.6243	1.374						100	0	5.018	0	1030	0	0	0	38.834			100	0	5.991	0	1030	0	0	0	47.175			100	0	6.735	0	1030	0	0	0	53.757	0		100
	150	0.547	1.912	0.182	1300	0	0	0	14.308	2.012						150	0	5.523	0	1030	0	0	0	43.217			150	0	6.496	0	1030	0	0	0	51.741			150	0	7.239	0	1030	0	0	0	58.451	0		150
	200	0.547	2.549	0.182	1300	0	0	0	19.155	2.649						200	0	6.027	0	1030	0	0	0	47.779			200	0	7	0	1030	0	0	0	56.508			200	0	7.744	0	1030	0	0	0	63.377	0		200
	250	0.547	3.186	0.182	1300	0	0	0	24.17	3.286						250	0	6.532	0	1030	0	0	0	52.483			250	0	7.505	0	1030	0	0	0	61.416			250	0	8.249	0	1030	0	0	0	68.435	0		250
	300	0.546	3.823	0.182	1300	0	0	0	29.348	3.923						300	0	7.037	0	1030	0	0	0	57.289			300	0	8.01	0	1030	0	0	0	66.418			300	0	8.753	0	1030	0	0	0	73.565	0		300
	350	0.546	4.46	0.182	1300	0	0	0	34.723	4.56						350	0	7.542	0	1030	0	0	0	62.264			350	0	8.514	0	1030	0	0	0	71.583			350	0	9.258	0	1030	0	0	0	78.878	0		350
	400	0.546	5.097	0.182	1300	0	0	0	40.25	5.197						400	0	8.046	0	1030	0	0	0	67.281			400	0	9.019	0	1030	0	0	0	76.784			400	0	9.763	0	1030	0	0	0	84.194	0		400
	450	0.546	5.735	0.182	1300	0	0	0	45.96	5.835						450	0	8.551	0	1030	0	0	0	72.402			450	0	9.524	0	1030	0	0	0	82.064			450	0	10.267	0	1030	0	0	0	89.561	0		450
	500	0.546	6.372	0.182	1300	0	0	0	51.878	6.472						500	0	9.056	0	1030	0	0	0	77.688			500	0	10.028	0	1030	0	0	0	87.493			500	0	10.772	0	1030	0	0	0	95.09	0		500
	550	0.546	7.009	0.182	1300	0	0	0	57.905	7.109						550	0	9.56	0	1030	0	0	0	82.93			550	0	10.533	0	1030	0	0	0	92.854			550	0	11.277	0	1030	0	0	0	100.5	0		550
	600	0.545	7.646	0.182	1300	0	0	0	64.081	7.746						600	0	10.065	0	1030	0	0	0	88.227			600	0	11.038	0	1030	0	0	0	98.232			600	0	11.782	0	1030	0	0	0	105.91	0		600
	650	0.545	8.283	0.182	1300	0	0	0	70.414	8.383						650	0	10.57	0	1030	0	0	0	93.588			650	0	11.543	0	1030	0	0	0	103.65			650	0	12.286	0	1030	0	0	0	111.32	0		650
	700	0.545	8.92	0.182	1300	0	0	0	76.705	9.02						700	0	11.074	0	1030	0	0	0	98.718			700	0	12.047	0	1030	0	0	0	108.77			700	0	12.791	0	1030	0	0	0	116.4	0		700
	750	0.545	9.557	0.182	1300	0	0	0	83.019	9.657						750	0	11.579	0	1030	0	0	0	103.77			750	0	12.552	0	1030	0	0	0	113.77			750	0	13.296	0	1030	0	0	0	121.34	0		750
	800	0.545	10.195	0.182	1300	0	0	0	89.193	10.295						800	0	12.084	0	1030	0	0	0	108.54			800	0	13.057	0	1030	0	0	0	118.44			800	0	13.8	0	1030	0	0	0	125.88	0		800
	850	0.545	10.832	0.182	1300	0	0	0	95.055	10.932						850	0	12.589	0	1030	0	0	0	112.88			850	0	13.561	0	1030	0	0	0	122.6			850	0	14.305	0	1030	0	0	0	129.9	0		850
	900	0.545	11.469	0.182	1300	0	0	0	100.07	11.569						900	0	13.093	0	1030	0	0	0	116.19			900	0	14.066	0	1030	0	0	0	125.66			900	0	14.81	0	1030	0	0	0	132.73	0		900
	950	0.544	12.106	0.182	1300	0	0	0	104.21	12.206						950	0	13.598	0	1030	0	0	0	118.54			950	0	14.571	0	1030	0	0	0	127.67			950	0	15.314	0	1030	0	0	0	134.48	0		950
	1000	0.544	12.743	0.182	1300	0	0	0	107.18	12.843						1000	0	14.103	0	188.399	0.215	0	0	119.69			1000	0	15.075	0	201.841	0.214	0	0	128.42			1000	0	15.819	0	211.952	0.213	0	0	134.93	0		1000
	1050	0.536	13.388	1.219	1300	0	0	0	110.76	13.488						1050	0	14.74	0	195.454	0.214	0	0	122.76			1050	0	15.712	0	208.614	0.214	0	0	131.15			1050	0	16.456	0	218.499	0.213	0	0	137.4	0		1050
	1100	0.528	14.034	1.219	1300	0	0	0	115.96	14.134						1100	0	15.377	0	202.285	0.214	0	0	127.65			1100	0	16.349	0	215.16	0.213	0	0	135.84			1100	0	17.093	0	224.818	0.213	0	0	141.93	0		1100
	1150	0.519	14.679	1.219	1300	0	0	0	120.86	14.779						1150	0	16.014	0	208.893	0.214	0	0	132.21			1150	0	16.986	0	221.483	0.213	0	0	140.19			1150	0	17.73	0	230.916	0.212	0	0	146.1	0		1150
	1200	0.511	15.325	1.219	1300	0	0	0	125.71	15.425						1200	0	16.651	0	215.284	0.213	0	0	136.71			1200	0	17.624	0	227.588	0.213	0	0	144.47			1200	0	18.367	0	236.799	0.212	0	0	150.2	0		1200
	1250	0.502	15.97	1.219	1300	0	0	0	130.31	16.07						1250	0	17.288	0	221.461	0.213	0	0	140.96			1250	0	18.261	0	233.484	0.212	0	0	148.49			1250	0	19.004	0	242.476	0.212	0	0	154.05	0		1250
	1300	0.494	16.615	1.219	1300	0	0	0	134.85	16.715						1300	0	17.925	0	227.431	0.213	0	0	145.14			1300	0	18.898	0	239.175	0.212	0	0	152.46			1300	0	19.641	0	247.954	0.212	0	0	157.84	0		1300
	1350	0.486	17.261	1.219	1300	0	0	0	139.1	17.361						1350	0	18.562	0	233.199	0.212	0	0	149.03			1350	0	19.535	0	244.67	0.212	0	0	156.12			1350	0	20.278	0	253.241	0.211	0	0	161.33	0		1350
	1400	0.477	17.906	1.219	1300	0	0	0	143.18	18.006						1400	0	19.199	0	238.772	0.212	0	0	152.76			1400	0	20.172	0	249.977	0.212	0	0	159.63			1400	0	20.915	0	258.345	0.211	0	0	164.68	0		1400
	1450	0.469	18.552	1.219	1300	0	0	0	147.12	18.652						1450	0	19.836	0	244.158	0.212	0	0	156.35			1450	0	20.809	0	255.102	0.211	0	0	163.01			1450	0	21.552	0	263.274	0.211	0	0	167.89	0		1450
	1500	0.46	19.197	1.219	1300	0	0	0	150.9	19.297						1500	0	20.473	0	249.362	0.212	0	0	159.79			1500	0	21.446	0	260.053	0.211	0	0	166.24			1500	0	22.189	0	268.034	0.211	0	0	170.98	0		1500
	1550	0.452	19.842	1.219	1300	0	0	0	154.58	19.942						1550	0	21.11	0	254.393	0.211	0	0	163.15			1550	0	22.083	0	264.838	0.211	0	0	169.4			1550	0	22.826	0	272.635	0.21	0	0	173.98	0		1550
	1600	0.444	20.488	1.219	1300	0	0	0	158.13	20.588						1600	0	21.747	0	259.256	0.211	0	0	166.37			1600	0	22.72	0	269.463	0.211	0	0	172.43			1600	0	23.463	0	277.082	0.21	0	0	176.87	0		1600
	1650	0.435	21.133	1.219	1300	0	0	0	161.53	21.233						1650	0	22.384	0	263.96	0.211	0	0	169.47			1650	0	23.357	0	273.936	0.21	0	0	175.34			1650	0	24.1	0	281.382	0.21	0	0	179.65	0		1650
	1700	0.427	21.779	1.219	1300	0	0	0	164.81	21.879						1700	0	23.021	0	268.511	0.211	0	0	172.45			1700	0	23.994	0	278.264	0.21	0	0	178.14			1700	0	24.737	0	285.543	0.21	0	0	182.32	0		1700
	1750	0.419	22.424	1.219	1300	0	0	0	167.95	22.524						1750	0	23.658	0	272.915	0.21	0	0	175.32			1750	0	24.631	0	282.452	0.21	0	0	180.84			1750	0	25.374	0	289.571	0.21	0	0	184.9	0		1750
	1800	0.41	23.069	1.219	1300	0	0	0	170.88	23.169						1800	0	24.295	0	277.179	0.21	0	0	177.98			1800	0	25.268	0	286.507	0.21	0	0	183.34			1800	0	26.011	0	293.472	0.209	0	0	187.27	0		1800
	1850	0.402	23.715	1.219	1300	0	0	0	173.7	23.815						1850	0	24.932	0	281.308	0.21	0	0	180.53			1850	0	25.905	0	290.435	0.209	0	0	185.74			1850	0	26.648	0	297.251	0.209	0	0	189.56	0		1850
	1900	0.393	24.36	1.219	1300	0	0	0	176.4	24.46						1900	0	25.569	0	285.309	0.21	0	0	182.99			1900	0	26.542	0	294.242	0.209	0	0	188.05			1900	0	27.285	0	300.913	0.209	0	0	191.76	0		1900
	1950	0.385	25.006	1.219	1300	0	0	0	179.01	25.106						1950	0	26.206	0	289.188	0.21	0	0	185.36			1950	0	27.179	0	297.933	0.209	0	0	190.28			1950	0	27.922	0	304.466	0.209	0	0	193.89	0	0	1950
	2000	0.377	25.651	1.219	1300	0	0	0	181.51	25.751						2000	0	26.843	0	292.949	0.209	0	0	187.65			2000	0	27.816	0	301.513	0.209	0	0	192.42			2000	0	28.559	0	307.911	0.209	0	0	195.94	0	0	2000
	2050	0.368	26.296	1.219	1300	1.612	0	0	183.93	26.396						2050	0	27.48	0	296.597	0.209	0	0	189.85			2050	0	28.453	0	304.987	0.209	0	0	194.49			2050	0	29.196	0	311.256	0.208	0	0	197.92	0	0	2050
	2100	0.36	26.942	1.219	1300	1.611	0	0	186.35	27.042						2100	0	28.117	0	300.139	0.209	0	0	192.06			2100	0	29.09	0	308.36	0.209	0	0	196.59			2100	0	29.833	0	314.504	0.208	0	0	199.92	0	0	2100
	2150	0.351	27.587	1.219	1300	1.61	0	0	188.68	27.687						2150	0	28.754	0	303.577	0.209	0	0	194.21			2150	0	29.727	0	311.635	0.208	0	0	198.61			2150	0	30.47	0	317.658	0.208	0	0	201.86	0	0	2150
	2200	0.343	28.233	1.219	1300	1.609	0	0	190.94	28.333						2200	0	29.391	0	306.917	0.209	0	0	196.28			2200	0	30.364	0	314.818	0.208	0	0	200.57	0		2200	0	31.107	0	320.724	0.208	0	0	203.74	0	0	2200
	2250	0.335	28.878	1.219	1299.99	1.608	0	0	193.02	28.978						2250	0	30.028	0	310.162	0.208	0	0	198.19			2250	0	31	0	317.911	0.208	0	0	202.37	0		2250	0	31.744	0	323.704	0.208	0	0	205.46	0	0	2250
	2300	0.326	29.523	1.219	1299.99	1.607	0	0	195.13	29.623						2300	0	30.665	0	313.317	0.208	0	0	200.13	0	0	2300	0	31.637	0	320.919	0.208	0	0	204.21	0		2300	0	32.38	0	326.602	0.208	0	0	207.22	0	0	2300
	2350	0.318	30.169	1.219	1299.98	1.606	0	0	197.26	30.269		0	0	0		2350	0	31.302	0	316.385	0.208	0	0	202.1	0	0	2350	0	32.274	0	323.845	0.208	0	0	206.08	0		2350	0	33.017	0	329.421	0.208	0	0	209.02	0	0	2350
	2400	0.309	30.814	1.219	1299.96	1.605	0	0	199.23	30.914		0	0	0		2400	0	31.939	0	319.371	0.208	0	0	203.91	0	0	2400	0	32.911	0	326.692	0.208	0	0	207.8	0	0	2400	0	33.653	0	332.162	0.208	0	0	210.67	0	0	2400
	2450	0.301	31.46	1.219	1299.92	1.605	0	0	201.06	31.56		0	0	0		2450	0	32.576	0	322.276	0.208	0	0	205.59	0	0	2450	0	33.547	0	329.463	0.208	0	0	209.38	0	0	2450	0	34.288	0	334.828	0.208	9.17431e-06	0	212.18	1.30163e-05	0.00276181	2450
	2500	0.293	32.105	1.219	1299.86	1.604	0	0	202.91	32.205		0	0	0		2500	0	33.212	0	325.104	0.208	0	0	207.3	0	0	2500	0	34.184	0	332.16	0.208	0	0	211.01	0	0	2500	0	34.923	0	337.42	0.209	0.00010455	0	213.74	0.000148334	0.031705	2500
	2550	0.284	32.75	1.219	1299.76	1.603	0	0	204.79	32.85		0	0	0		2550	0	33.849	0	327.858	0.208	0	0	209.05	0	0	2550	0	34.82	0	334.784	0.208	0	0	212.67	0	0	2550	0	35.557	0	339.939	0.209	0.00203756	0	215.34	0.00289085	0.622516	2550
	2600	0.276	33.395	1.219	1299.57	1.602	0	0	206.61	33.495		0	0	0		2600	0	34.485	0	330.54	0.208	0	0	210.74	0	0	2600	0	35.455	0	337.339	0.208	0	0	214.28	0	0	2600	0	36.189	0	342.386	0.21	0.00516323	0	216.88	0.00732549	1.58875	2600
	2650	0.268	34.041	1.219	1299.27	1.601	0	0	208.39	34.141		0	0	0		2650	0	35.121	0	333.152	0.208	0	0	212.39	0	0	2650	0	36.089	0	339.824	0.209	0	0	215.85	0	0	2650	0	36.819	0	344.76	0.212	0.0112901	0	218.38	0.0160182	3.49805	2650
	2700	0.259	34.685	1.218	1298.78	1.6	0	0	210.11	34.785		0	0	0		2700	0	35.757	0	335.696	0.208	0	0	213.99	0	0	2700	0	36.722	0	342.24	0.21	0.000943396	0	217.37	0.00133847	0.290944	2700	0	37.447	0	347.062	0.213	0.0186716	0	219.83	0.0264909	5.82348	2700
	2750	0.251	35.33	1.218	1297.99	1.599	0	0	211.78	35.43		0	0	0		2750	0	36.392	0	338.173	0.209	0	0	215.55	0	0	2750	0	37.354	0	344.587	0.211	0.00320755	0	218.84	0.00455081	0.995899	2750	0	38.072	0	349.291	0.215	0.0403066	0	221.23	0.0571862	12.6513	2750
	2800	0.242	35.974	1.218	1296.77	1.599	0	0	213.41	36.074		0	0	0		2800	0	37.026	0	340.583	0.209	0	0	217.06	0	0	2800	0	37.983	0	346.866	0.212	0.00920189	0	220.27	0.0130555	2.87573	2800	0	38.695	0	351.449	0.217	0.0546441	0	222.6	0.077528	17.2577	2800
	2850	0.234	36.617	1.217	1294.9	1.598	0	0	214.99	36.717		0	0	0		2850	0	37.658	0	342.927	0.21	0	0	218.53	0	0	2850	0	38.61	0	349.077	0.214	0.0212815	0	221.66	0.0301938	6.69276	2850	0	39.314	0	353.54	0.218	0.0630828	0	223.91	0.0895006	20.0401	2850
	2900	0.226	37.26	1.216	1292.35	1.597	0	0	216.61	37.36		0	0	0		2900	0	38.289	0	345.206	0.211	1.95122e-05	0	220.04	2.76835e-05	0.00609148	2900	0	39.234	0	351.219	0.215	0.0383943	0	223.09	0.0544732	12.1524	2900	0	39.931	0	355.566	0.22	0.0671437	0	225.27	0.0952622	21.4597	2900
	2950	0.217	37.9	1.215	1288.7	1.596	0	0	218.1	38		0	0	0		2950	0	38.917	0	347.419	0.213	0.00265366	0	221.42	0.00376496	0.833637	2950	0	39.856	0	353.295	0.217	0.0608898	0	224.39	0.0863893	19.3849	2950	0	40.545	0	357.534	0.221	0.0699226	0	226.51	0.0992049	22.4709	2950
	3000	0.209	38.539	1.213	1283.85	1.595	0	0	219.63	38.639		0	0	0		3000	0	39.543	0	349.566	0.214	0.0191532	0	222.84	0.0271742	6.05549	3000	0	40.475	0	355.308	0.219	0.0741632	0	225.74	0.105221	23.7527	3000	0	41.158	0	359.45	0.222	0.0714798	0	227.8	0.101414	23.1022	3000
	3050	0.201	39.175	1.211	1277.63	1.594	0	0	221.27	39.275	0	0	0	0		3050	0	40.167	0	351.649	0.216	0.0360357	0	224.39	0.0511268	11.4723	3050	0	41.091	0	357.262	0.22	0.0750244	0	227.2	0.106443	24.1839	3050	0	41.77	0	361.318	0.222	0.0725317	0	229.22	0.102907	23.5883	3050
	3100	0.193	39.807	1.208	1270.01	1.593	0.0001	0	222.86	39.907	0.000141878	0.031619	0.0448604	0		3100	0	40.788	0	353.669	0.217	0.0811526	0	225.89	0.115138	26.0085	3100	0	41.705	0	359.162	0.221	0.0754725	0	228.63	0.107079	24.4815	3100	0	42.381	0	363.143	0.222	0.0729589	0	230.6	0.103513	23.87	3100
	3150	0.184	40.436	1.204	1261.11	1.592	0.002	0	224.41	40.536	0.00283756	0.636777	0.903447	0		3150	0	41.406	0	355.629	0.219	0.0816855	0	227.35	0.115894	26.3485	3150	0	42.318	0	361.014	0.221	0.0764063	0	230.03	0.108404	24.9361	3150	0	42.991	0	364.926	0.222	0.0728861	0	231.96	0.103409	23.9868	3150
	3200	0.176	41.059	1.2	1251.29	1.59	0.0391782	0	225.91	0.0555853	0.0555853	12.5573	17.816	0.0947635		3200	0	42.021	0	357.535	0.22	0.0826935	0	228.76	0.117324	26.839	3200	0	42.929	0	362.821	0.222	0.0759063	0	231.39	0.107694	24.9194	3200	0	43.602	0	366.671	0.222	0.0729385	0	233.29	0.103484	24.1417	3200
	3250	0.168	41.678	1.196	1241.1	1.589	0.0874438	0	227.36	0.124064	0.124064	28.2071	40.0197	0.211507		3250	0	42.635	0	359.389	0.221	0.0826935	0	230.15	0.117324	27.0021	3250	0	43.541	0	364.587	0.222	0.0755473	0	232.72	0.107185	24.9441	3250	0	44.212	0	368.38	0.222	0.0728385	0	234.58	0.103342	24.2419	3250
	3300	0.16	42.291	1.192	1231.27	1.588	0.09052	0	228.84	0.128428	0.128428	29.3895	41.6972	0.218948		3300	0	43.248	0	361.198	0.222	0.0821793	0	231.59	0.116594	27.0021	3300	0	44.151	0	366.315	0.222	0.0753244	0	234.11	0.106869	25.0191	3300	0	44.822	0	370.054	0.222	0.072211	0	235.94	0.102452	24.1724	3300
	3350	0.15	42.903	1.312	1222.62	1.737	0.0899138	0	230.29	0.127568	0.127568	29.3776	41.6804	0.217482		3350	0	43.859	0	362.965	0.221	0.0816855	0	232.99	0.115894	27.0021	3350	0	44.762	0	368.006	0.221	0.0750943	0	235.46	0.106542	25.0865	3350	0	45.433	0	371.698	0.22	0.0715697	0	237.26	0.101542	24.0918	3350
	3400	0.139	43.511	1.308	1215.87	1.735	0.0892694	0	231.86	0.126654	0.126654	29.3659	41.6638	0.215923		3400	0	44.47	0	364.692	0.221	0.0811526	0	234.52	0.115138	27.0021	3400	0	45.372	0	369.662	0.221	0.0745252	0	236.95	0.105735	25.0539	3400	0	46.045	0	373.315	0.22	0.0694523	0	238.72	0.0985376	23.5229	3400
	3450	0.128	44.116	1.306	1210.68	1.734	0.0886493	0	233.39	0.125774	0.125774	29.3544	41.6475	0.214423		3450	0	45.081	0	366.383	0.221	0.0806368	0	236.02	0.114406	27.0021	3450	0	45.982	0	371.286	0.221	0.0739744	0	238.4	0.104953	25.0209	3450	0	46.657	0	374.903	0.22	0.0680535	0	240.16	0.096553	23.1882	3450
	3500	0.117	44.719	1.303	1207.02	1.732	0.0874438	0	234.92	0.124064	0.124064	29.145	41.3504	0.211507		3500	0	45.691	0	368.039	0.221	0.0796183	0	237.52	0.112961	26.8305	3500	0	46.593	0	372.883	0.22	0.0732198	0	239.88	0.103883	24.9194	3500	0	47.269	0	376.459	0.22	0.0648651	0	241.6	0.0920294	22.2343	3500
	3550	0.107	45.321	1.302	1204.46	1.73	0.0862612	0	236.47	0.122386	0.122386	28.9405	41.0603	0.208647		3550	0	46.301	0	369.662	0.221	0.0791305	0	239.05	0.112269	26.8379	3550	0	47.205	0	374.456	0.22	0.0733896	0	241.37	0.104124	25.1324	3550	0	47.881	0	377.987	0.219	0.0596312	0	243.06	0.0846036	20.5638	3550
	3600	0.096	45.921	1.301	1202.85	1.729	0.0856429	0	238.05	0.121509	0.121509	28.9251	41.0384	0.207151		3600	0	46.911	0	371.254	0.221	0.0786427	0	240.62	0.111577	26.8476	3600	0	47.817	0	375.998	0.22	0.071333	0	242.9	0.101206	24.5829	3600	0	48.496	0	379.501	0.216	0.0552727	0	244.58	0.0784198	19.1799	3600
	3650	0.085	46.521	1.3	1201.7	1.727	0.0862612	0	239.73	0.122386	0.122386	29.3395	41.6264	0.208647		3650	0	47.522	0	372.822	0.22	0.076722	0	242.28	0.108852	26.3726	3650	0	48.429	0	377.512	0.22	0.0703896	0	244.53	0.0998675	24.4206	3650	0	49.117	0	381.016	0.213	0.047822	0	246.2	0.067849	16.7044	3650
	3700	0.075	47.12	1.299	1200.76	1.725	0.0868427	0	241.42	0.123211	0.123211	29.7456	42.2024	0.210054		3700	0	48.134	0	374.366	0.22	0.075422	0	243.96	0.107007	26.1055	3700	0	49.041	0	378.998	0.219	0.0665502	0	246.17	0.0944201	23.2434	3700	0	49.741	0	382.52	0.212	0.0366039	0	247.84	0.0519328	12.871	3700
	3750	0.064	47.719	1.298	1199.96	1.723	0.0874438	0	243.11	0.124064	0.124064	30.1611	42.792	0.211507		3750	0	48.746	0	375.881	0.22	0.0752205	0	245.64	0.106721	26.215	3750	0	49.658	0	380.479	0.215	0.049353	0	247.83	0.0700211	17.3533	3750	0	50.367	0	384.003	0.211	0.031287	0	249.5	0.0443894	11.0752	3750
	3800	0.047	48.323	1.567	1198.05	2.053	0.096	0	244.87	0.115084	0.115084	28.1806	33.7827	0.211084		3800	0	49.355	0	377.353	0.22	0.0826667	0	247.38	0.0991003	24.5154	3800	0	50.279	0	381.954	0.213	0.043954	0	249.56	0.0526917	13.1497	3800	0	50.992	0	385.46	0.21	0.0298701	0	251.21	0.035808	8.99534	3800
	3850	0.035	48.922	1.391	1197.93	1.836	0.0953489	0	246.71	0.114304	0.114304	28.1998	33.8057	0.209652		3850	0	49.965	0	378.799	0.22	0.0782689	0	249.2	0.0938281	23.382	3850	0	50.902	0	383.415	0.212	0.0371145	0	251.38	0.0444926	11.1846	3850	0	51.619	0	386.897	0.21	0.0261363	0	253.01	0.031332	7.92732	3850
	3900	0.023	49.52	1.39	1197.11	1.834	0.0946912	0	248.6	0.113515	0.113515	28.2199	33.8298	0.208206		3900	0	50.581	0	380.254	0.214	0.0472312	0	251.08	0.0566204	14.2163	3900	0	51.527	0	384.857	0.211	0.0319953	0	253.25	0.0383557	9.71358	3900	0	52.248	0	388.315	0.209	0.0224026	0	254.86	0.026856	6.84453	3900
	3950	0.012	50.118	1.39	1196.27	1.832	0.0940502	0	250.46	0.112747	0.112747	28.2385	33.8521	0.206797		3950	0	51.203	0	381.712	0.213	0.0418334	0	252.96	0.0501495	12.6858	3950	0	52.153	0	386.28	0.21	0.0281558	0	255.1	0.033753	8.6104	3950	0	52.877	0	389.713	0.208	0.0199134	0	256.69	0.023872	6.12771	3950
	4000	0	50.692	1.389	1195.5	1.83	0.0933286	0	252.54	0.111882	0.111882	28.2546	33.8714	0.20521		4000	0	51.827	0	383.152	0.212	0.037785	0	255.12	0.0452963	11.556	4000	0	52.781	0	387.685	0.21	0.0255962	0	257.22	0.0306846	7.89268	4000	0	53.508	0	391.091	0.208	0.0161796	0	258.8	0.019396	5.01969	4000
																																															2.04521	480.896
											1.9962	476.27					A1	0.0283756																A1	0.0283756	2.02963	479.994
																	A2	0.0239758																A2	0.0239758									A1	0.0283756
																																												A2	0.0239758
			A1	0.0283756	井深	Rb	Bn	V悬浮
			A2	0.0239758	2700	0.000502779	0.744858	0.0517652																	2.01419	478.139							0.000889996
					2750	0.000503165	0.74543	0.0517223																									0.00302599	`										8.4168e-06
					2800	0.000503542	0.745989	0.0516804																									0.00868103											9.59179e-05
				Bnc2	2850	0.000503909	0.746532	0.0516397																									0.0200769											0.00186932
				0.273797	2900	0.000504285	0.74709	0.051598																									0.0362211											0.00473691
					2950	0.000504633	0.747604	0.0515596																									0.0574432											0.0103579
					3000	0.00050499	0.748133	0.0515201																									0.0699653											0.0171299
					3050	0.000505374	0.748701	0.0514778																									0.0707778											0.0369785
					3100	0.000505746	0.749254	0.0514366																									0.0712005											0.0501322
					3150	0.000506111	0.749794	0.0513965																									0.0720815											0.0578741
					3200	0.000506464	0.750317	0.0513577																									0.0716098											0.0615997
					3250	0.000506806	0.750824	0.0513201																									0.071271											0.0641492
					3300	0.000507156	0.751342	0.0512816																									0.0710608											0.0655778
					3350	0.0005075	0.751851	0.051244																									0.0708437											0.0665429
					3400	0.000507873	0.752404	0.0512031																									0.0703068											0.0669348
					3450	0.000508237	0.752943	0.0511633																									0.0697871											0.0668679
					3500	0.000508602	0.753484	0.0511234																									0.0690753											0.0669161
					3550	0.000508972	0.754033	0.051083																									0.0692355											0.0668243
					3600	0.000509351	0.754593	0.0510417																									0.0672953											0.0662486
					3650	0.000509754	0.755191	0.0509978																									0.0664053											0.0656603
					3700	0.000510161	0.755794	0.0509536																									0.0627832											0.0637177
					3750	0.000510568	0.756398	0.0509093																									0.0465595											0.0624344
					3800	0.000510994	0.757028	0.0508632																									0.041466											0.0595093
					3850	0.00051144	0.757689	0.0508149																									0.0350137											0.0547075
					3900	0.0005119	0.75837	0.0507652																									0.0301842											0.0507089
					3950	0.000512353	0.759042	0.0507162																									0.0265621											0.0438734
					4000	0.000512862	0.759795	0.0506614																									0.0241474											0.0335815
																																												0.0287037
																																												0.0274038
																																												0.0239783
																																												0.0205528
																																												0.0182692
																																												0.0148437
[truncated: 12 more columns]

## Sheet: 套管压力变化
	无溶解、无悬浮
	时刻	泥浆池增量
	0	0
	0.5	0
	1	0
	1.5	0
	2	0
	2.5	0
	3	0
	3.5	0
	4	0
	4.5	0
	5	0
	5.5	0
	6	0
	6.5	0
	7	0
	7.5	0
	8	0
	0	0	50.4195	55		0	50.4195
	1	0.226	50.6455	55		0.2034	50.6229
	1.5	0.296	50.7155	55		0.2664	50.6859
	2	0.366	50.7855	55		0.3294	50.7489								4.42	0.999025		4.5
	2.5	0.435	50.8545	55		0.3915	50.811								8.23	1.99917		8
	3	0.503	50.9225	55		0.4527	50.8722								11.53	2.99918		11.5
	3.5	0.57	50.9895	55		0.513	50.9325								14.49	4.00177		14.5
	4	0.637	51.0565	55		0.5733	50.9928								17.18	4.99954		17
	4.5	0.702	51.1215	55		0.6318	51.0513
	5	0.766	51.1855	55		0.6894	51.1089
	5.5	0.83	51.2495	55		0.747	51.1665
	6	0.892	51.3115	55		0.8028	51.2223
	6.5	0.954	51.3735	55		0.8586	51.2781
	7	1.015	51.4345	55		0.9135	51.333
	7.5	1.075	51.4945	55		0.9675	51.387
	8	1.134	51.5535	55		1.0206	51.4401
	8.5	1.192	51.6115	55		1.0728	51.4923
	9	1.25	51.6695	55		1.125	51.5445
	9.5	1.307	51.7265	55		1.1763	51.5958
	10	1.363	51.7825	55		1.2267	51.6462
	10.5	1.418	51.8375	55		1.2762	51.6957
	11	1.472	51.8915	55		1.3248	51.7443
	11.5	1.526	51.9455	55		1.3734	51.7929
	12	1.579	51.9985	55		1.4211	51.8406
	12.5	1.631	52.0505	55		1.4679	51.8874
	13	1.683	52.1025	55		1.5147	51.9342
	13.5	1.734	52.1535	55		1.5606	51.9801
	14	1.784	52.2035	55		1.6056	52.0251
	14.5	1.833	52.2525	55		1.6497	52.0692
	15	1.882	52.3015	55		1.6938	52.1133
	15.5	1.93	52.3495	55		1.737	52.1565
	16	1.978	52.3975	55		1.7802	52.1997
	16.5	2.025	52.4445	55		1.8225	52.242
	17	2.071	52.4905	55		1.8639	52.2834
	17.5	2.116	52.5355	55		1.9044	52.3239
	18	2.161	52.5805	55		1.9449	52.3644
	18.5	2.206	52.6255	55		1.9854	52.4049
	19	2.25	52.6695	55		2.025	52.4445
	19.5	2.293	52.7125	55		2.0637	52.4832
	20	2.335	52.7545	55		2.1015	52.521
	20.5	2.378	52.7975	55		2.1402	52.5597
	21	2.419	52.8385	55		2.1771	52.5966
	21.5	2.46	52.8795	55		2.214	52.6335
	22	2.5	52.9195	55		2.25	52.6695
	22.5	2.54	52.9595	55		2.286	52.7055
	23	2.58	52.9995	55		2.322	52.7415
	23.5	2.619	53.0385	55		2.3571	52.7766
	24	2.657	53.0765	55		2.3913	52.8108
	24.5	2.695	53.1145	55		2.4255	52.845
	25	2.732	53.1515	55		2.4588	52.8783
	25.5	2.769	53.1885	55		2.4921	52.9116
	26	2.805	53.2245	55		2.5245	52.944
	26.5	2.841	53.2605	55		2.5569	52.9764
	27	2.876	53.2955	55		2.5884	53.0079
	27.5	2.911	53.3305	55		2.6199	53.0394
	28	2.946	53.3655	55		2.6514	53.0709
	28.5	2.98	53.3995	55		2.682	53.1015
	29	3.013	53.4325	55		2.7117	53.1312
	29.5	3.046	53.4655	55		2.7414	53.1609
	30	3.079	53.4985	55		2.7711	53.1906
	30.5	3.111	53.5305	55		2.7999	53.2194
	31	3.143	53.5625	55		2.8287	53.2482
	31.5	3.175	53.5945	55		2.8575	53.277
	32	3.206	53.6255	55		2.8854	53.3049
	32.5	3.236	53.6555	55		2.9124	53.3319
	33	3.266	53.6855	55		2.9394	53.3589
	33.5	3.296	53.7155	55		2.9664	53.3859
	34	3.326	53.7455	55		2.9934	53.4129
	34.5	3.355	53.7745	55		3.0195	53.439
	35	3.383	53.8025	55		3.0447	53.4642
	35.5	3.411	53.8305	55		3.0699	53.4894
	36	3.439	53.8585	55		3.0951	53.5146
	36.5	3.467	53.8865	55		3.1203	53.5398
	37	3.494	53.9135	55		3.1446	53.5641
	37.5	3.521	53.9405	55		3.1689	53.5884
	38	3.548	53.9675	55		3.1932	53.6127
	38.5	3.574	53.9935	55		3.2166	53.6361
	39	3.6	54.0195	55		3.24	53.6595
	39.5	3.625	54.0445	55		3.2625	53.682
	40	3.651	54.0705	55		3.2859	53.7054
	40.5	3.676	54.0955	55		3.3084	53.7279
	41	3.7	54.1195	55		3.33	53.7495
	41.5	3.724	54.1435	55		3.3516	53.7711
	42	3.748	54.1675	55		3.3732	53.7927
	42.5	3.772	54.1915	55		3.3948	53.8143
	43	3.795	54.2145	55		3.4155	53.835
	43.5	3.819	54.2385	55		3.4371	53.8566
	44	3.841	54.2605	55		3.4569	53.8764
	44.5	3.864	54.2835	55		3.4776	53.8971
	45	3.886	54.3055	55		3.4974	53.9169
	45.5	3.908	54.3275	55		3.5172	53.9367
	46	3.93	54.3495	55		3.537	53.9565
	46.5	3.951	54.3705	55		3.5559	53.9754
	47	3.973	54.3925	55		3.5757	53.9952
	47.5	3.993	54.4125	55		3.5937	54.0132
	48	4.014	54.4335	55		3.6126	54.0321
	48.5	4.035	54.4545	55		3.6315	54.051
	49	4.055	54.4745	55		3.6495	54.069
	49.5	4.075	54.4945	55		3.6675	54.087
	50	4.095	54.5145	55		3.6855	54.105
	50.5	4.114	54.5335	55		3.7026	54.1221
	51	4.133	54.5525	55		3.7197	54.1392
	51.5	4.152	54.5715	55		3.7368	54.1563
	52	4.171	54.5905	55		3.7539	54.1734
	52.5	4.19	54.6095	55		3.771	54.1905
	53	4.208	54.6275	55		3.7872	54.2067
	53.5	4.226	54.6455	55		3.8034	54.2229
	54	4.244	54.6635	55		3.8196	54.2391
	54.5	4.262	54.6815	55		3.8358	54.2553
	55	4.28	54.6995	55		3.852	54.2715
	55.5	4.297	54.7165	55		3.8673	54.2868
	56	4.314	54.7335	55		3.8826	54.3021
	56.5	4.331	54.7505	55		3.8979	54.3174
	57	4.348	54.7675	55		3.9132	54.3327
	57.5	4.365	54.7845	55		3.9285	54.348
	58	4.381	54.8005	55		3.9429	54.3624
	58.5	4.397	54.8165	55		3.9573	54.3768
	59	4.413	54.8325	55		3.9717	54.3912
	59.5	4.429	54.8485	55		3.9861	54.4056
	60	4.445	54.8645	55		4.0005	54.42
	60.5	4.46	54.8795	55		4.014	54.4335
	61	4.476	54.8955	55		4.0284	54.4479
	61.5	4.491	54.9105	55		4.0419	54.4614
	62	4.506	54.9255	55		4.0554	54.4749
	62.5	4.521	54.9405	55		4.0689	54.4884
	63	4.536	54.9555	55		4.0824	54.5019
	63.5	4.55	54.9695	55		4.095	54.5145
	64	4.565	54.9845	55		4.1085	54.528
	64.5	4.579	55	55		4.1211	54.5406
