# Supplementary material for: A drilling wellbore pressure calculation model considering the effect of gas dissolution and suspension
Source: Frontiers journal article supplement (doi:10.3389/feart.2022.993876), 2022-09-27
Supplement: Data_Sheet_4.xlsx [file Data_Sheet_4.xlsx]

## Sheet: 气体悬浮
	0min	2m3														10min	2m3													30min	2m3													30min	2m3
密度	井深m	环空压耗	环空压力	泥浆流速m/s	平均密度	实际气速	自由气VF	溶解气wc	气体密度	体积误差1	悬浮气体体积	运移气质量	悬浮气质量	总气体积分数		井深m	环空压耗	环空压力	泥浆流速m/s	平均密度	实际气速	自由气VF	溶解气wc	气体密度	运移气VF	悬浮气体VF	运移气体积	悬浮气体积		井深m	环空压耗	环空压力	泥浆流速m/s	平均密度	实际气速	自由气VF	溶解气wc	气体密度	运移气VF	悬浮气体VF	运移气体积	悬浮气体积		井深m	环空压耗	环空压力	泥浆流速m/s	平均密度	实际气速
	0	0.509	0	0.173	1300	0	0	0	0.68051							0	0.509	0	0.173	1300	0	0	0	0.68051						0	0.509	0	0.173	1300	0	0	0	0.68051						0	0.509	0	0.173	1300	0
	50	0.509	0.637	0.173	1300	0	0	0	5.0864							50	0.509	0.637	0.173	1300	0	0	0	5.0864						50	0.509	0.637	0.173	1300	0	0	0	5.0864						50	0.509	0.637	0.173	1300	0
	100	0.509	1.274	0.173	1300	0	0	0	9.6243							100	0.509	1.274	0.173	1300	0	0	0	9.6243						100	0.509	1.274	0.173	1300	0	0	0	9.6243						100	0.509	1.274	0.173	1300	0
	150	0.509	1.912	0.173	1300	0	0	0	14.301							150	0.509	1.912	0.173	1300	0	0	0	14.301						150	0.509	1.912	0.173	1300	0	0	0	14.301						150	0.509	1.912	0.173	1300	0
	200	0.509	2.549	0.173	1300	0	0	0	19.148							200	0.509	2.549	0.173	1300	0	0	0	19.148						200	0.509	2.549	0.173	1300	0	0	0	19.148						200	0.509	2.549	0.173	1300	0
	250	0.508	3.186	0.173	1300	0	0	0	24.162							250	0.508	3.186	0.173	1300	0	0	0	24.162						250	0.508	3.186	0.173	1300	0	0	0	24.162						250	0.508	3.186	0.173	1300	0
	300	0.508	3.823	0.173	1300	0	0	0	29.34							300	0.508	3.823	0.173	1300	0	0	0	29.34						300	0.508	3.823	0.173	1300	0	0	0	29.34						300	0.508	3.823	0.173	1300	0
	350	0.508	4.46	0.173	1300	0	0	0	34.714							350	0.508	4.46	0.173	1300	0	0	0	34.714						350	0.508	4.46	0.173	1300	0	0	0	34.714						350	0.508	4.46	0.173	1300	0
	400	0.508	5.097	0.173	1300	0	0	0	40.241							400	0.508	5.097	0.173	1300	0	0	0	40.241						400	0.508	5.097	0.173	1300	0	0	0	40.241						400	0.508	5.097	0.173	1300	0
	450	0.508	5.734	0.173	1300	0	0	0	45.951							450	0.508	5.734	0.173	1300	0	0	0	45.951						450	0.508	5.734	0.173	1300	0	0	0	45.951						450	0.508	5.734	0.173	1300	0
	500	0.508	6.372	0.173	1300	0	0	0	51.869							500	0.508	6.372	0.173	1300	0	0	0	51.869						500	0.508	6.372	0.173	1300	0	0	0	51.869						500	0.508	6.372	0.173	1300	0
	550	0.507	7.009	0.173	1300	0	0	0	57.895							550	0.507	7.009	0.173	1300	0	0	0	57.895						550	0.507	7.009	0.173	1300	0	0	0	57.895						550	0.507	7.009	0.173	1300	0
	600	0.507	7.646	0.173	1300	0	0	0	64.071							600	0.507	7.646	0.173	1300	0	0	0	64.071						600	0.507	7.646	0.173	1300	0	0	0	64.071						600	0.507	7.646	0.173	1300	0
	650	0.507	8.283	0.173	1300	0	0	0	70.404							650	0.507	8.283	0.173	1300	0	0	0	70.404						650	0.507	8.283	0.173	1300	0	0	0	70.404						650	0.507	8.283	0.173	1300	0
	700	0.507	8.92	0.173	1300	0	0	0	76.695							700	0.507	8.92	0.173	1300	0	0	0	76.695						700	0.507	8.92	0.173	1300	0	0	0	76.695						700	0.507	8.92	0.173	1300	0
	750	0.507	9.557	0.173	1300	0	0	0	83.009							750	0.507	9.557	0.173	1300	0	0	0	83.009						750	0.507	9.557	0.173	1300	0	0	0	83.009						750	0.507	9.557	0.173	1300	0
	800	0.507	10.194	0.173	1300	0	0	0	89.173							800	0.507	10.194	0.173	1300	0	0	0	89.173						800	0.507	10.194	0.173	1300	0	0	0	89.173						800	0.507	10.194	0.173	1300	0
	850	0.507	10.832	0.173	1300	0	0	0	95.035							850	0.507	10.832	0.173	1300	0	0	0	95.035						850	0.507	10.832	0.173	1300	0	0	0	95.035						850	0.507	10.832	0.173	1300	0
	900	0.506	11.469	0.173	1300	0	0	0	100.05							900	0.506	11.469	0.173	1300	0	0	0	100.05						900	0.506	11.469	0.173	1300	0	0	0	100.05						900	0.506	11.469	0.173	1300	0
	950	0.506	12.106	0.173	1300	0	0	0	104.19							950	0.506	12.106	0.173	1300	0	0	0	104.19						950	0.506	12.106	0.173	1300	0	0	0	104.19						950	0.506	12.106	0.173	1300	0
	1000	0.506	12.743	0.173	1300	0	0	0	107.16							1000	0.506	12.743	0.173	1300	0	0	0	107.16						1000	0.506	12.743	0.173	1300	0	0	0	107.16						1000	0.506	12.743	0.173	1300	0
	1050	0.499	13.388	1.161	1300	0	0	0	110.69							1050	0.499	13.388	1.161	1300	0	0	0	110.69						1050	0.499	13.388	1.161	1300	0	0	0	110.69						1050	0.499	13.388	1.161	1300	0
	1100	0.491	14.032	1.161	1300	0	0	0	115.83							1100	0.491	14.032	1.161	1300	0	0	0	115.83						1100	0.491	14.032	1.161	1300	0	0	0	115.83						1100	0.491	14.032	1.161	1300	0
	1150	0.483	14.677	1.161	1300	0	0	0	120.69							1150	0.483	14.677	1.161	1300	0	0	0	120.69						1150	0.483	14.677	1.161	1300	0	0	0	120.69						1150	0.483	14.677	1.161	1300	0
	1200	0.475	15.322	1.161	1300	0	0	0	125.48							1200	0.475	15.322	1.161	1300	0	0	0	125.48						1200	0.475	15.322	1.161	1300	0	0	0	125.48						1200	0.475	15.322	1.161	1300	0
	1250	0.467	15.967	1.161	1300	0	0	0	130.04							1250	0.467	15.967	1.161	1300	0	0	0	130.04						1250	0.467	15.967	1.161	1300	0	0	0	130.04						1250	0.467	15.967	1.161	1300	0
	1300	0.46	16.611	1.161	1300	0	0	0	134.53							1300	0.46	16.611	1.161	1300	0	0	0	134.53						1300	0.46	16.611	1.161	1300	0	0	0	134.53						1300	0.46	16.611	1.161	1300	0
	1350	0.452	17.256	1.161	1300	0	0	0	138.74							1350	0.452	17.256	1.161	1300	0	0	0	138.74						1350	0.452	17.256	1.161	1300	0	0	0	138.74						1350	0.452	17.256	1.161	1300	0
	1400	0.444	17.901	1.161	1300	0	0	0	142.79							1400	0.444	17.901	1.161	1300	0	0	0	142.79						1400	0.444	17.901	1.161	1300	0	0	0	142.79						1400	0.444	17.901	1.161	1300	0
	1450	0.436	18.546	1.161	1300	0	0	0	146.69							1450	0.436	18.546	1.161	1300	0	0	0	146.69						1450	0.436	18.546	1.161	1300	0	0	0	146.69						1450	0.436	18.546	1.161	1300	0
	1500	0.429	19.191	1.161	1300	0	0	0	150.44							1500	0.429	19.191	1.161	1300	0	0	0	150.44						1500	0.429	19.191	1.161	1300	0	0	0	150.44						1500	0.429	19.191	1.161	1300	0
	1550	0.421	19.835	1.161	1300	0	0	0	154.1							1550	0.421	19.835	1.161	1300	0	0	0	154.1						1550	0.421	19.835	1.161	1300	0	0	0	154.1						1550	0.421	19.835	1.161	1300	0
	1600	0.413	20.48	1.161	1300	0	0	0	157.61							1600	0.413	20.48	1.161	1300	0	0	0	157.61						1600	0.413	20.48	1.161	1300	0	0	0	157.61						1600	0.413	20.48	1.161	1300	0
	1650	0.405	21.125	1.161	1300	0	0	0	160.99							1650	0.405	21.125	1.161	1300	0	0	0	160.99						1650	0.405	21.125	1.161	1300	0	0	0	160.99						1650	0.405	21.125	1.161	1300	0
	1700	0.398	21.77	1.161	1300	0	0	0	164.24							1700	0.398	21.77	1.161	1300	0	0	0	164.24						1700	0.398	21.77	1.161	1300	0	0	0	164.24						1700	0.398	21.77	1.161	1300	0
	1750	0.39	22.414	1.161	1300	1.548	0	0	167.36							1750	0.39	22.414	1.161	1300	1.548	0	0	167.36						1750	0.39	22.414	1.161	1300	1.548	0	0	167.36						1750	0.39	22.414	1.161	1300	1.548
	1800	0.382	23.059	1.161	1300	1.547	0	0	170.28							1800	0.382	23.059	1.161	1300	1.547	0	0	170.28						1800	0.382	23.059	1.161	1300	1.547	0	0	170.28						1800	0.382	23.059	1.161	1300	1.547
	1850	0.374	23.704	1.161	1300	1.546	0	0	173.07							1850	0.374	23.704	1.161	1300	1.546	0	0	173.07						1850	0.374	23.704	1.161	1300	1.546	0	0	173.07						1850	0.374	23.704	1.161	1300	1.546
	1900	0.367	24.349	1.161	1300	1.545	0	0	175.76							1900	0.367	24.349	1.161	1300	1.545	0	0	175.76						1900	0.367	24.349	1.161	1300	1.545	0	0	175.76						1900	0.367	24.349	1.161	1300	1.545
	1950	0.359	24.994	1.161	1300	1.544	0	0	178.35							1950	0.359	24.994	1.161	1300	1.544	0	0	178.35						1950	0.359	24.994	1.161	1300	1.544	0	0	178.35						1950	0.359	24.994	1.161	1300	1.544
	2000	0.351	25.638	1.161	1299.99	1.543	0	0	180.84							2000	0.351	25.638	1.161	1299.99	1.543	0	0	180.84						2000	0.351	25.638	1.161	1299.99	1.543	0	0	180.84						2000	0.351	25.638	1.161	1299.99	1.543
	2050	0.343	26.283	1.161	1299.98	1.542	0	0	183.24							2050	0.343	26.283	1.161	1299.98	1.542	0	0	183.24						2050	0.343	26.283	1.161	1299.98	1.542	0	0	183.24						2050	0.343	26.283	1.161	1299.98	1.542
	2100	0.336	26.928	1.161	1299.97	1.541	0	0	185.65							2100	0.336	26.928	1.161	1299.97	1.541	0	0	185.65						2100	0.336	26.928	1.161	1299.97	1.541	0	0	185.65						2100	0.336	26.928	1.161	1299.97	1.541
	2150	0.328	27.573	1.161	1299.95	1.541	0	0	187.98							2150	0.328	27.573	1.161	1299.95	1.541	0	0	187.98						2150	0.328	27.573	1.161	1299.95	1.541	0	0	187.98						2150	0.328	27.573	1.161	1299.95	1.541
	2200	0.32	28.217	1.161	1299.92	1.54	0	0	190.22							2200	0.32	28.217	1.161	1299.92	1.54	0	0	190.22						2200	0.32	28.217	1.161	1299.92	1.54	0	0	190.22						2200	0.32	28.217	1.161	1299.92	1.54
	2250	0.312	28.862	1.161	1299.86	1.539	0	0	192.3							2250	0.312	28.862	1.161	1299.86	1.539	0	0	192.3						2250	0.312	28.862	1.161	1299.86	1.539	0	0	192.3						2250	0.312	28.862	1.161	1299.86	1.539
	2300	0.305	29.507	1.161	1299.76	1.538	0	0	194.39							2300	0.305	29.507	1.161	1299.76	1.538	0	0	194.39						2300	0.305	29.507	1.161	1299.76	1.538	0	0	194.39						2300	0.305	29.507	1.161	1299.76	1.538
	2350	0.297	30.151	1.161	1299.6	1.537	0	0	196.51		0	0	0	0		2350	0.297	30.151	1.161	1299.6	1.537	0	0	196.51		0	0	0		2350	0.297	30.151	1.161	1299.6	1.537	0	0	196.51		0	0	0		2350	0.297	30.151	1.161	1299.6	1.537
	2400	0.289	30.796	1.161	1299.35	1.536	0	0	198.48		0	0	0	0		2400	0.289	30.796	1.161	1299.35	1.536	0	0	198.48		0	0	0		2400	0.289	30.796	1.161	1299.35	1.536	0	0	198.48		0	0	0		2400	0.289	30.796	1.161	1299.35	1.536
	2450	0.281	31.44	1.161	1298.97	1.535	0	0	200.29		0	0	0	0		2450	0.281	31.44	1.161	1298.97	1.535	0	0	200.29		0	0	0		2450	0.281	31.44	1.161	1298.97	1.535	0	0	200.29		0	0	0		2450	0.281	31.44	1.161	1298.97	1.535
	2500	0.274	32.084	1.161	1298.38	1.534	0	0	202.14		0	0	0	0		2500	0.274	32.084	1.161	1298.38	1.534	0	0	202.14		0	0	0		2500	0.274	32.084	1.161	1298.38	1.534	0	0	202.14		0	0	0		2500	0.274	32.084	1.161	1298.38	1.534
	2550	0.266	32.728	1.16	1297.52	1.534	0	0	204.01		0	0	0	0		2550	0.266	32.728	1.16	1297.52	1.534	0	0	204.01		0	0	0		2550	0.266	32.728	1.16	1297.52	1.534	0	0	204.01		0	0	0		2550	0.266	32.728	1.16	1297.52	1.534
	2600	0.258	33.371	1.16	1296.28	1.533	0	0	205.83		0	0	0	0		2600	0.258	33.371	1.16	1296.28	1.533	0	0	205.83		0	0	0		2600	0.258	33.371	1.16	1296.28	1.533	0	0	205.83	0	0	0	0		2600	0.258	33.371	1.16	1296.28	1.533
	2650	0.25	34.014	1.159	1294.53	1.532	0	0	207.6		0	0	0	0		2650	0.25	34.014	1.159	1294.53	1.532	0	0	207.6		0	0	0		2650	0.25	34.014	1.159	1294.53	1.532	0	0	207.6	0	0.0321323	0	0.0455887		2650	0.25	34.014	1.159	1294.53	1.532
	2700	0.243	34.655	1.158	1292.28	1.531	0	0	209.32		0	0	0	0		2700	0.243	34.655	1.158	1292.28	1.531	0	0	209.32		0	0	0		2700	0.243	34.655	1.158	1292.28	1.531	0.0345	0	209.32	0.00239996	0.0321	0.00340502	0.0455429		2700	0.243	34.655	1.158	1292.28	1.531
	2750	0.235	35.295	1.157	1289.29	1.53	0	0	210.99		0	0	0	0		2750	0.235	35.295	1.157	1289.29	1.53	0	0	210.99		0	0	0		2750	0.235	35.295	1.157	1289.29	1.53	0.0363066	0	210.99	0.00423789	0.0320687	0.00601263	0.0454984		2750	0.235	35.295	1.157	1289.29	1.53
	2800	0.227	35.934	1.156	1285.62	1.529	0	0	212.62		0	0	0	0		2800	0.227	35.934	1.156	1285.62	1.529	0	0	212.62		0	0	0		2800	0.227	35.934	1.156	1285.62	1.529	0.0404871	0	212.62	0.00844906	0.032038	0.0119874	0.0454549		2800	0.227	35.934	1.156	1285.62	1.529
	2850	0.22	36.57	1.154	1281.27	1.528	0	0	214.2		0	0	0	0		2850	0.22	36.57	1.154	1281.27	1.528	0	0	214.2		0	0	0		2850	0.22	36.57	1.154	1281.27	1.528	0.0517498	0	214.2	0.0197415	0.0320083	0.0280089	0.0454127		2850	0.22	36.57	1.154	1281.27	1.528
	2900	0.212	37.205	1.152	1276.31	1.527	0	0	215.83		0	0	0	0		2900	0.212	37.205	1.152	1276.31	1.95122e-05	0	0	215.83		0	0	0		2900	0.212	37.205	1.152	1276.31	1.527	0.0550812	0	215.83	0.0231036	0.0319776	0.032779	0.0453692		2900	0.212	37.205	1.152	1276.31	1.527
	2950	0.204	37.836	1.15	1270.9	1.526	0	0	217.33		0	0	0	0	0	2950	0.204	37.836	1.15	1270.9	0.00365366	0.0314493	0	217.33	0	0.0314493	0	0.0446197		2950	0.204	37.836	1.15	1270.9	1.526	0.0573609	0	217.33	0.0254116	0.0319493	0.0360535	0.0453291		2950	0.204	37.836	1.15	1270.9	1.526
	3000	0.197	38.465	1.148	1265.28	1.525	0	0	218.87		0	0	0	0	0	3000	0.197	38.465	1.148	1265.28	0.0191532	0.0321532	0	218.87	0.00023291	0.0319203	0.000330448	0.0452879		3000	0.197	38.465	1.148	1265.28	1.525	0.0586383	0	218.87	0.0267181	0.0319203	0.0379071	0.0452879		3000	0.197	38.465	1.148	1265.28	1.525
	3050	0.189	39.091	1.146	1259.74	1.524	0	0	220.54		0	0	0	0	0	3050	0.189	39.091	1.146	1259.74	0.0360357	0.0512806	0	220.54	0.0193919	0.0318887	0.0275128	0.0452431		3050	0.189	39.091	1.146	1259.74	1.524	0.0595013	0	220.54	0.0276126	0.0318887	0.0391762	0.0452431		3050	0.189	39.091	1.146	1259.74	1.524
	3100	0.182	39.715	1.144	1254.6	1.522	0	0	222.17		0.00327874	0	1.03349	0	1.03349	3100	0.182	39.715	1.144	1254.6	0.0811526	0.073351	0	222.17	0.041493	0.0318579	0.0588695	0.0451994		3100	0.182	39.715	1.144	1254.6	1.523	0.0598517	0	222.17	0.0279938	0.0318579	0.039717	0.0451994		3100	0.182	39.715	1.144	1254.6	1.523
	3150	0.174	40.336	1.142	1250.11	1.521	0.0592698	0	223.76	0.0318279	0.0318279	15.8986	10.1043	0.0910977	26.0029	3150	0.174	40.336	1.142	1250.11	0.0816855	0.0738387	0	223.76	0.0420108	0.0318279	0.0596041	0.0451568		3150	0.174	40.336	1.142	1250.11	1.522	0.059792	0	223.76	0.0279641	0.0318279	0.0396749	0.0451568		3150	0.174	40.336	1.142	1250.11	1.522
	3200	0.167	40.955	1.14	1246.45	1.52	0.0588595	0.00306	225.32	0.0141435	0.0317984	15.8986	10.1653	0.0906578	26.0639	3200	0.167	40.955	1.14	1246.45	0.0826935	0.0747611	0	225.32	0.0429628	0.0317984	0.0609547	0.0451149		3200	0.167	40.955	1.14	1246.45	1.521	0.059835	0	225.32	0.0280366	0.0317984	0.0397779	0.0451149		3200	0.167	40.955	1.14	1246.45	1.521
	3250	0.16	41.572	1.139	1243.52	1.518	0.0584651	0.00376	226.84	0.0102213	0.0317696	15.8986	10.2246	0.0902346	26.1232	3250	0.16	41.572	1.139	1243.52	0.0826935	0.074373	0	226.84	0.0426034	0.0317696	0.0604449	0.0450741		3250	0.16	41.572	1.139	1243.52	1.52	0.059753	0	226.84	0.0279834	0.0317696	0.0397023	0.0450741		3250	0.16	41.572	1.139	1243.52	1.52
	3300	0.152	42.188	1.137	1241.56	1.517	0.0576741	0.0044	228.41	0.00669712	0.0317398	15.7921	10.2857	0.0894139	26.0778	3300	0.152	42.188	1.137	1241.56	0.0821793	0.0752057	0	228.41	0.0434659	0.0317398	0.0616686	0.0450318		3300	0.152	42.188	1.137	1241.56	1.519	0.0592382	0	228.41	0.0274984	0.0317398	0.0390142	0.0450318		3300	0.152	42.188	1.137	1241.56	1.519
	3350	0.142	42.806	1.255	1239.65	1.66	0.0572904	0.00488	229.94	0.00412098	0.0317108	15.7921	10.3452	0.0890012	26.1373	3350	0.142	42.806	1.255	1239.65	0.0816855	0.0738387	0	229.94	0.0421279	0.0317108	0.0597702	0.0449907		3350	0.142	42.806	1.255	1239.65	1.518	0.0587121	0	229.94	0.0270013	0.0317108	0.0383089	0.0449907		3350	0.142	42.806	1.255	1239.65	1.518
	3400	0.132	43.423	1.254	1238.65	1.658	0.0568797	0.00522	231.6	0.00237876	0.0316793	15.7921	10.4095	0.088559	26.2016	3400	0.132	43.423	1.254	1238.65	0.0811526	0.0742661	0	231.6	0.0425868	0.0316793	0.0604214	0.044946		3400	0.132	43.423	1.254	1238.65	1.517	0.0569751	0	231.6	0.0252958	0.0316793	0.0358892	0.044946		3400	0.132	43.423	1.254	1238.65	1.517
	3450	0.122	44.04	1.254	1237.89	1.657	0.0564822	0.00543	233.23	0.00138205	0.0316483	15.7921	10.4725	0.0881305	26.2646	3450	0.122	44.04	1.254	1237.89	0.0796368	0.0737941	0	233.23	0.0421458	0.0316483	0.0597957	0.044902		3450	0.122	44.04	1.254	1237.89	1.516	0.0557624	0	233.23	0.0241141	0.0316483	0.0342126	0.044902		3450	0.122	44.04	1.254	1237.89	1.516
	3500	0.112	44.657	1.253	1237.24	1.655	0.0560878	0.00552	234.87	0.00106405	0.0316171	15.7921	10.5357	0.087705	26.3279	3500	0.112	44.657	1.253	1237.24	0.0786183	0.0728621	0	234.87	0.0412449	0.0316171	0.0585175	0.0448578		3500	0.112	44.657	1.253	1237.24	1.515	0.0547279	0	234.87	0.0231108	0.0316171	0.0327891	0.0448578		3500	0.112	44.657	1.253	1237.24	1.515
	3550	0.101	45.273	1.252	1236.64	1.654	0.0556989	0.00555	236.51	0.00107981	0.0315859	15.7921	10.5988	0.0872848	26.391	3550	0.101	45.273	1.252	1236.64	0.0781305	0.0724157	0	236.51	0.0408297	0.0315859	0.0579284	0.0448135		3550	0.101	45.273	1.252	1236.64	1.514	0.0533757	0	236.51	0.0217898	0.0315859	0.030915	0.0448135		3550	0.101	45.273	1.252	1236.64	1.514
	3600	0.091	45.889	1.252	1236.06	1.652	0.0553037	0.00557	238.2	0.0011549	0.0315537	15.7921	10.6637	0.0868575	26.4558	3600	0.091	45.889	1.252	1236.06	0.0776427	0.0710541	0	238.2	0.0395004	0.0315537	0.0560424	0.0447678		3600	0.091	45.889	1.252	1236.06	1.513	0.052953	0	238.2	0.0213993	0.0315537	0.0303609	0.0447678		3600	0.091	45.889	1.252	1236.06	1.513
	3650	0.081	46.504	1.251	1235.48	1.651	0.0548958	0.00558	239.97	0.00129121	0.03152	15.7921	10.7314	0.0864158	26.5236	3650	0.081	46.504	1.251	1235.48	0.076722	0.0702115	0	239.97	0.0386916	0.03152	0.0548948	0.04472		3650	0.081	46.504	1.251	1235.48	1.512	0.0516608	0	239.97	0.0201408	0.03152	0.0285754	0.04472		3650	0.081	46.504	1.251	1235.48	1.512
	3700	0.071	47.12	1.251	1234.89	1.649	0.0544916	0.0056	241.75	0.00137227	0.031486	15.7921	10.7994	0.0859776	26.5915	3700	0.071	47.12	1.251	1234.89	0.075422	0.0690219	0	241.75	0.0375358	0.031486	0.0532551	0.0446718		3700	0.071	47.12	1.251	1234.89	1.511	0.0504044	0	241.75	0.0189183	0.031486	0.026841	0.0446718		3700	0.071	47.12	1.251	1234.89	1.511
	3750	0.061	47.735	1.25	1234.34	1.647	0.0541	0.00561	243.5	0.00150188	0.0314526	15.7921	10.866	0.0855526	26.6581	3750	0.061	47.735	1.25	1234.34	0.0752205	0.0688374	0	243.5	0.0373848	0.0314526	0.0530408	0.0446244		3750	0.061	47.735	1.25	1234.34	1.51	0.0469765	0	243.5	0.0155239	0.0314526	0.0220251	0.0446244		3750	0.061	47.735	1.25	1234.34	1.51
	3800	0.045	48.355	1.509	1233.02	1.961	0.0587693	0.00563	245.26	0.00157716	0.031419	17.2791	9.23767	0.0901882	26.5168	3800	0.045	48.355	1.509	1233.02	0.0826667	0.0738215	0	245.26	0.0424025	0.031419	0.0508318	0.0376648		3800	0.045	48.355	1.509	1233.02	1.509	0.0551289	0	245.26	0.0237099	0.031419	0.0284233	0.0376648		3800	0.045	48.355	1.509	1233.02	1.509
	3850	0.033	48.971	1.34	1232.93	1.755	0.0583458	0.00564	247.04	0.0017055	0.0313849	17.2791	9.29463	0.0897307	26.5737	3850	0.033	48.971	1.34	1232.93	0.0782689	0.0722689	0	247.04	0.040884	0.0313849	0.0490114	0.037624		3850	0.033	48.971	1.34	1232.93	1.508	0.0535212	0	247.04	0.0221363	0.0313849	0.0265369	0.037624		3850	0.033	48.971	1.34	1232.93	1.508
	3900	0.022	49.586	1.34	1232.35	1.753	0.0579331	0.00566	248.8	0.00177725	0.0313512	17.2791	9.3508	0.0892843	26.6299	3900	0.022	49.586	1.34	1232.35	0.0472312	0.0705824	0	248.8	0.0392312	0.0313512	0.0470301	0.0375836		3900	0.022	49.586	1.34	1232.35	1.507	0.0517538	0	248.8	0.0204026	0.0313512	0.0244584	0.0375836		3900	0.022	49.586	1.34	1232.35	1.507
	3950	0.011	50.201	1.339	1231.75	1.751	0.0575376	0.00567	250.51	0.00189446	0.0313184	17.2791	9.40522	0.0888561	26.6843	3950	0.011	50.201	1.339	1231.75	0.0418334	0.0631518	0	250.51	0.0318334	0.0313184	0.0381616	0.0375443		3950	0.011	50.201	1.339	1231.75	1.506	0.0492318	0	250.51	0.0179134	0.0313184	0.0214744	0.0375443		3950	0.011	50.201	1.339	1231.75	1.506
	4000	0	50.791	1.339	1231.2	1.75	0.0571	0.00569	252.43	0.00197843	0.0312816	17.2791	9.46616	0.0883816	26.7453	4000	0	50.791	1.339	1231.2	0.037785	0.0590666	0	252.43	0.027785	0.0312816	0.0333084	0.0375001		4000	0	50.791	1.339	1231.2	1.505	0.0434612	0	252.43	0.0121796	0.0312816	0.0146009	0.0375001		4000	0	50.791	1.339	1231.2	1.505
					井深	Rb	Bn	V悬浮																																	0.788627	1.22551	2.01414
					1900	0.000495039	1.10009	0.0327251
					1950	0.00049561	1.10136	0.0326772											A1	0.0283756			0.0305333				1.06139	0.951938	2.01333							0.0396932
					2000	0.000496161	1.10258	0.0326311											A2	0.0239758			0.0312167													0.0507351
			A1	0.0283756	2050	0.000496694	1.10376	0.0325867							#NAME?								0.049787													0.0540012
			A2	0.0239758	2100	0.000497231	1.10496	0.032542															0.0712145		0.776344		1.95122e-05									0.0562362
					2150	0.000497751	1.10611	0.0324987															0.071688				0.00265366									0.0574886
					2200	0.000498254	1.10723	0.032457	0														0.0725836				0.0191532									0.0583346
				Bnc2	2250	0.000498721	1.10827	0.0324183	0														0.0722068				0.0360357									0.0586781
				0.273797	2300	0.000499192	1.10932	0.0323794	0.059694														0.0730152				0.0811526									0.0586196
					2350	0.000499672	1.11038	0.0323398	0.0592698														0.071688				0.0816855									0.0586618
					2400	0.000500118	1.11137	0.0323031	0.0588595		0.0883816												0.072103				0.0826935									0.0585813
					2450	0.00050053	1.11229	0.0322692	0.0580733														0.0716448				0.0826935									0.0580766
					2500	0.000500951	1.11322	0.0322346	0.0576741														0.0707399				0.0821793									0.0575609
					2550	0.000501378	1.11417	0.0321996	0.0572904		3550												0.0703065				0.0816855									0.0558579
					2600	0.000501795	1.1151	0.0321655	0.0568797		3200												0.0689846				0.0811526									0.054669
					2650	0.000502201	1.116	0.0321323	0.0564822		2850												0.0681665				0.0806368									0.0536548
					2700	0.000502597	1.11688	0.0321	0.0560878		2550												0.0670115				0.0796183									0.0523291
					2750	0.000502983	1.11774	0.0320687	0.0556989		2300												0.0668324				0.0791305									0.0519147
					2800	0.000503359	1.11858	0.032038	0.0553037														0.0716713				0.0786427									0.0506478
					2850	0.000503725	1.11939	0.0320083	0.0548958																		0.076722									0.049416
					2900	0.000504104	1.12023	0.0319776	0.0544916																		0.075422									0.0460554
					2950	0.000504453	1.12101	0.0319493	0.0591941																		0.0752205
					3000	0.000504812	1.1218	0.0319203	0.0587693																		0.0826667
					3050	0.000505203	1.12267	0.0318887	0.0583458																		0.0782689
					3100	0.000505584	1.12352	0.0318579	0.0579331																		0.0472312
					3150	0.000505958	1.12435	0.0318279	0.0575376																		0.0418334
					3200	0.000506325	1.12517	0.0317984																			0.037785
					3250	0.000506683	1.12596	0.0317696
					3300	0.000507054	1.12679	0.0317398
					3350	0.000507417	1.12759	0.0317108
					3400	0.000507811	1.12847	0.0316793
					3450	0.000508199	1.12933	0.0316483
					3500	0.00050859	1.1302	0.0316171
					3550	0.000508982	1.13107	0.0315859
					3600	0.000509387	1.13197	0.0315537
					3650	0.000509812	1.13291	0.03152
					3700	0.00051024	1.13387	0.031486
					3750	0.000510663	1.13481	0.0314526
					3800	0.000511089	1.13575	0.031419
					3850	0.00051152	1.13671	0.0313849
					3900	0.000511948	1.13766	0.0313512
					3950	0.000512365	1.13859	0.0313184
					4000	0.000512835	1.13963	0.0312816
[truncated: 8 more columns]

## Sheet: 钻井液密度对悬浮浓度
	无溶解、无悬浮									悬浮气泡半径						Bn						Vfc
	井深m	环空压耗	环空压力	泥浆流速m/s	平均密度	实际气速	自由气VF	悬浮气体积	气体密度	1000	1100	1200	1500	1700	2000	1000	1100	1200	1500	1700	2000	1000	1100	1200	1500	1700	2000
	0	0.547	0	0.182	1300	0	0	0	0.68051	0	0	0	0	0	0	0	0	0	0	0	0	0	0	0	0	0	0
	50	0.547	0.637	0.182	1300	0	0	0	5.0864	0	0	0	0	0	0	0	0	0	0	0	0	0	0	0	0	0	0
	100	0.547	1.274	0.182	1300	0	0	0	9.6243	0	0	0	0	0	0	0	0	0	0	0	0	0	0	0	0	0	0
	150	0.547	1.912	0.182	1300	0	0	0	14.301	0	0	0	0	0	0	0	0	0	0	0	0	0	0	0	0	0	0
	200	0.547	2.549	0.182	1300	0	0	0	19.148	0	0	0	0	0	0	0	0	0	0	0	0	0	0	0	0	0	0
	250	0.547	3.186	0.182	1300	0	0	0	24.162	0	0	0	0	0	0	0	0	0	0	0	0	0	0	0	0	0	0
	300	0.546	3.823	0.182	1300	0	0	0	29.34	0	0	0	0	0	0	0	0	0	0	0	0	0	0	0	0	0	0
	350	0.546	4.46	0.182	1300	0	0	0	34.714	0	0	0	0	0	0	0	0	0	0	0	0	0	0	0	0	0	0
	400	0.546	5.097	0.182	1300	0	0	0	40.25	0	0	0	0	0	0	0	0	0	0	0	0	0	0	0	0	0	0
	450	0.546	5.735	0.182	1300	0	0	0	45.951	0	0	0	0	0	0	0	0	0	0	0	0	0	0	0	0	0	0
	500	0.546	6.372	0.182	1300	0	0	0	51.869	0	0	0	0	0	0	0	0	0	0	0	0	0	0	0	0	0	0
	550	0.546	7.009	0.182	1300	0	0	0	57.895	0	0	0	0	0	0	0	0	0	0	0	0	0	0	0	0	0	0
	600	0.545	7.646	0.182	1300	0	0	0	64.071	0	0	0	0	0	0	0	0	0	0	0	0	0	0	0	0	0	0
	650	0.545	8.283	0.182	1300	0	0	0	70.404	0	0	0	0	0	0	0	0	0	0	0	0	0	0	0	0	0	0
	700	0.545	8.92	0.182	1300	0	0	0	76.695	0	0	0	0	0	0	0	0	0	0	0	0	0	0	0	0	0	0
	750	0.545	9.557	0.182	1300	0	0	0	83.009	0	0	0	0	0	0	0	0	0	0	0	0	0	0	0	0	0	0
	800	0.545	10.195	0.182	1300	0	0	0	89.173	0	0	0	0	0	0	0	0	0	0	0	0	0	0	0	0	0	0
	850	0.545	10.832	0.182	1300	0	0	0	95.035	0	0	0	0	0	0	0	0	0	0	0	0	0	0	0	0	0	0
	900	0.545	11.469	0.182	1300	0	0	0	100.05	0	0	0	0	0	0	0	0	0	0	0	0	0	0	0	0	0	0
	950	0.544	12.106	0.182	1300	0	0	0	104.19	0	0	0	0	0	0	0	0	0	0	0	0	0	0	0	0	0	0
	1000	0.544	12.743	0.182	1300	0	0	0	107.16	0	0	0	0	0	0	0	0	0	0	0	0	0	0	0	0	0	0
	1050	0.536	13.388	1.219	1300	0	0	0	110.69	0	0	0	0	0	0	0	0	0	0	0	0	0	0	0	0	0	0
	1100	0.528	14.034	1.219	1300	0	0	0	115.84	0	0	0	0	0	0	0	0	0	0	0	0	0	0	0	0	0	0
	1150	0.519	14.679	1.219	1300	0	0	0	120.69	0	0	0	0	0	0	0	0	0	0	0	0	0	0	0	0	0	0
	1200	0.511	15.325	1.219	1300	0	0	0	125.48	0	0	0	0	0	0	0	0	0	0	0	0	0	0	0	0	0	0
	1250	0.502	15.97	1.219	1300	0	0	0	130.04	0	0	0	0	0	0	0	0	0	0	0	0	0	0	0	0	0	0
	1300	0.494	16.615	1.219	1300	0	0	0	134.54	0	0	0	0	0	0	0	0	0	0	0	0	0	0	0	0	0	0
	1350	0.486	17.261	1.219	1300	0	0	0	138.75	0	0	0	0	0	0	0	0	0	0	0	0	0	0	0	0	0	0
	1400	0.477	17.906	1.219	1300	0	0	0	142.8	0	0	0	0	0	0	0	0	0	0	0	0	0	0	0	0	0	0
	1450	0.469	18.552	1.219	1300	0	0	0	146.7	0	0	0	0	0	0	0	0	0	0	0	0	0	0	0	0	0	0
	1500	0.46	19.197	1.219	1300	0	0	0	150.45	0	0	0	0	0	0	0	0	0	0	0	0	0	0	0	0	0	0
	1550	0.452	19.842	1.219	1300	0	0	0	154.1	0	0	0	0	0	0	0	0	0	0	0	0	0	0	0	0	0	0
	1600	0.444	20.488	1.219	1300	0	0	0	157.62	0	0	0	0	0	0	0	0	0	0	0	0	0	0	0	0	0	0
	1650	0.435	21.133	1.219	1300	0	0	0	161	0	0	0	0	0	0	0	0	0	0	0	0	0	0	0	0	0	0
	1700	0.427	21.779	1.219	1300	0	0	0	164.25	0	0	0	0	0	0	0	0	0	0	0	0	0	0	0	0	0	0
	1750	0.419	22.424	1.219	1300	0	0	0	167.37	0	0	0	0	0	0	0	0	0	0	0	0	0	0	0	0	0	0
	1800	0.41	23.069	1.219	1300	0	0	0	170.28	0	0	0	0	0	0	0	0	0	0	0	0	0	0	0	0	0	0
	1850	0.402	23.715	1.219	1300	0	0	0	173.08	0	0	0	0	0	0	0	0	0	0	0	0	0	0	0	0	0	0
	1900	0.393	24.36	1.219	1300	0	0	0	175.77	0	0	0	0	0	0	0	0	0	0	0	0	0	0	0	0	0	0
	1950	0.385	25.006	1.219	1300	0	0	0	178.36	0	0	0	0	0	0	0	0	0	0	0	0	0	0	0	0	0	0
	2000	0.377	25.651	1.219	1300	0	0	0	180.85	0	0	0	0	0	0	0	0	0	0	0	0	0	0	0	0	0	0
	2050	0.368	26.296	1.219	1300	1.612	0	0	183.25	0	0	0	0	0	0	0	0	0	0	0	0	0	0	0	0	0	0
	2100	0.36	26.942	1.219	1300	1.611	0	0	185.66	0	0	0	0	0	0	0	0	0	0	0	0	0	0	0	0	0	0
	2150	0.351	27.587	1.219	1300	1.61	0	0	187.99	0	0	0	0	0	0	0	0	0	0	0	0	0	0	0	0	0	0
	2200	0.343	28.233	1.219	1300	1.609	0	0	190.23	0	0	0	0	0	0	0	0	0	0	0	0	0	0	0	0	0	0
	2250	0.335	28.878	1.219	1299.99	1.608	0	0	192.31	0	0	0	0	0	0	0	0	0	0	0	0	0	0	0	0	0	0
	2300	0.326	29.523	1.219	1299.99	1.607	0	0	194.41	0	0	0	0	0	0	0	0	0	0	0	0	0	0	0	0	0	0
	2350	0.318	30.169	1.219	1299.98	1.606	0	0	196.53	0	0	0	0	0	0	0	0	0	0	0	0	0	0	0	0	0	0
	2400	0.309	30.814	1.219	1299.96	1.605	0	0	198.49	0	0	0	0	0	0	0	0	0	0	0	0	0	0	0	0	0	0
	2450	0.301	31.46	1.219	1299.92	1.605	0	0	200.3	0	0	0	0	0	0	0	0	0	0	0	0	0	0	0	0	0	0
	2500	0.293	32.105	1.219	1299.86	1.604	0	0	202.15	0	0	0	0	0	0	0	0	0	0	0	0	0	0	0	0	0	0
	2550	0.284	32.75	1.219	1299.76	1.603	0	0	204.02	0	0	0	0	0	0	0	0	0	0	0	0	0	0	0	0	0	0
	2600	0.276	33.395	1.219	1299.57	1.602	0	0	205.84	0	0	0	0	0	0	0	0	0	0	0	0	0	0	0	0	0	0
	2650	0.268	34.041	1.219	1299.27	1.601	0	0	207.61	0	0	0	0	0	0	0	0	0	0	0	0	0	0	0	0	0	0
	2700	0.259	34.685	1.218	1298.78	1.6	0	0	209.33	0	0	0	0	0	0	0	0	0	0	0	0	0	0	0	0	0	0
	2750	0.251	35.33	1.218	1297.99	1.599	0	0	211.01	0	0	0	0	0	0	0	0	0	0	0	0	0	0	0	0	0	0
	2800	0.242	35.974	1.218	1296.77	1.599	0	0	212.63	0	0	0	0	0	0	0	0	0	0	0	0	0	0	0	0	0	0
	2850	0.234	36.617	1.217	1294.9	1.598	0	0	214.21	0	0	0	0	0	0	0	0	0	0	0	0	0	0	0	0	0	0
	2900	0.226	37.26	1.216	1292.35	1.597	0	0	215.84	0	0	0	0	0	0	0	0	0	0	0	0	0	0	0	0	0	0
	2950	0.217	37.9	1.215	1288.7	1.596	0	0	217.34	0	0	0	0	0	0	0	0	0	0	0	0	0	0	0	0	0	0
	3000	0.209	38.539	1.213	1283.85	1.595	0	0	218.88	0	0	0	0	0	0	0	0	0	0	0	0	0	0	0	0	0	0
	3050	0.201	39.175	1.211	1277.63	1.594	0	0	220.55	0	0	0	0	0	0	0	0	0	0	0	0	0	0	0	0	0	0
	3100	0.193	39.807	1.208	1270.01	1.593	0	0.00327874	222.18	0.000595154	0.00056023	0.00053081	0.000464338	0.000431776	0.000393663	1.32256	1.24495	1.17958	1.03186	0.959501	0.874807	0.00327874	0.00327874	0.00327874	0.00327874	0.00327874	0.00327874
	3150	0.184	40.436	1.204	1261.11	1.592	0	0.0318279	223.77	0.000595763	0.000560738	0.000531242	0.000464627	0.000432008	0.000393839	1.32392	1.24608	1.18054	1.0325	0.960018	0.875199	0.0256684	0.0278385	0.0298867	0.035434	0.038731	0.0432081
	3200	0.176	41.059	1.2	1251.29	1.59	0.0426178	0.0317984	225.33	0.000596363	0.000561238	0.000531667	0.000464911	0.000432236	0.000394013	1.32525	1.24719	1.18148	1.03314	0.960526	0.875583	0.0256335	0.0278056	0.0298556	0.0354072	0.0387063	0.0431861
	3250	0.168	41.678	1.196	1241.1	1.589	0.0874438	0.0317696	226.85	0.000596949	0.000561726	0.000532082	0.000465189	0.000432459	0.000394181	1.32655	1.24828	1.18241	1.03375	0.961021	0.875959	0.0255994	0.0277735	0.0298252	0.035381	0.0386822	0.0431646
	3300	0.16	42.291	1.192	1231.27	1.588	0.09052	0.0317398	228.42	0.000597556	0.000562232	0.000532512	0.000465476	0.00043269	0.000394356	1.3279	1.2494	1.18336	1.03439	0.961533	0.876347	0.0255642	0.0277404	0.0297939	0.0353539	0.0386574	0.0431424
	3350	0.15	42.903	1.312	1222.62	1.737	0.0899138	0.0317108	229.96	0.000598153	0.000562729	0.000532935	0.000465758	0.000432917	0.000394528	1.32923	1.25051	1.1843	1.03502	0.962037	0.876728	0.0255297	0.0277078	0.0297631	0.0353273	0.038633	0.0431206
	3400	0.139	43.511	1.308	1215.87	1.735	0.0892694	0.0316793	231.62	0.000598799	0.000563267	0.000533391	0.000466062	0.000433161	0.000394713	1.33066	1.2517	1.18531	1.03569	0.962581	0.877139	0.0254924	0.0276727	0.0297299	0.0352987	0.0386067	0.0430972
	3450	0.128	44.116	1.306	1210.68	1.734	0.0886493	0.0316483	233.24	0.000599431	0.000563793	0.000533838	0.00046636	0.0004334	0.000394894	1.33207	1.25287	1.18631	1.03636	0.963112	0.877541	0.025456	0.0276384	0.0296975	0.0352707	0.038581	0.0430742
	3500	0.117	44.719	1.303	1207.02	1.732	0.0874438	0.0316171	234.87	0.000600069	0.000564324	0.000534289	0.000466661	0.000433641	0.000395076	1.33349	1.25405	1.18731	1.03702	0.963648	0.877946	0.0254193	0.0276039	0.0296648	0.0352425	0.0385551	0.0430511
	3550	0.107	45.321	1.302	1204.46	1.73	0.0862612	0.0315859	236.48	0.000600701	0.000564849	0.000534735	0.000466958	0.00043388	0.000395256	1.33489	1.25522	1.1883	1.03768	0.964178	0.878347	0.025383	0.0275698	0.0296325	0.0352147	0.0385296	0.0430283
	3600	0.096	45.921	1.301	1202.85	1.729	0.0856429	0.0315537	238.11	0.000601344	0.000565383	0.000535188	0.000467259	0.000434122	0.000395439	1.33632	1.25641	1.18931	1.03835	0.964715	0.878753	0.0253462	0.0275351	0.0295998	0.0351865	0.0385036	0.0430052
	3650	0.085	46.521	1.3	1201.7	1.727	0.0862612	0.03152	239.78	0.000602004	0.000565932	0.000535653	0.000467569	0.00043437	0.000395626	1.33779	1.25763	1.19034	1.03904	0.965266	0.87917	0.0253085	0.0274997	0.0295663	0.0351575	0.0384771	0.0429815
	3700	0.075	47.12	1.299	1200.76	1.725	0.0868427	0.031486	241.4	0.000602646	0.000566465	0.000536105	0.00046787	0.000434611	0.000395809	1.33921	1.25881	1.19135	1.03971	0.965802	0.879575	0.0252719	0.0274652	0.0295337	0.0351294	0.0384513	0.0429585
	3750	0.064	47.719	1.298	1199.96	1.723	0.0874438	0.0314526	242.97	0.000603271	0.000566984	0.000536545	0.000468162	0.000434845	0.000395985	1.3406	1.25996	1.19232	1.04036	0.966322	0.879968	0.0252363	0.0274318	0.0295021	0.0351022	0.0384263	0.0429362
	3800	0.047	48.323	1.567	1198.05	2.053	0.096	0.031419	244.55	0.000603901	0.000567507	0.000536988	0.000468456	0.000435081	0.000396164	1.342	1.26113	1.19331	1.04101	0.966847	0.880364	0.0252006	0.0273981	0.0294703	0.0350748	0.0384011	0.0429138
	3850	0.035	48.922	1.391	1197.93	1.836	0.0953489	0.0313849	246.22	0.00060457	0.000568062	0.000537458	0.000468768	0.000435331	0.000396352	1.34349	1.26236	1.19435	1.04171	0.967402	0.880783	0.0251627	0.0273625	0.0294366	0.0350458	0.0383745	0.04289
	3900	0.023	49.52	1.39	1197.11	1.834	0.0946912	0.0313512	247.93	0.000605257	0.000568632	0.000537941	0.000469088	0.000435587	0.000396546	1.34502	1.26363	1.19542	1.04242	0.967971	0.881212	0.0251239	0.027326	0.0294021	0.035016	0.0383472	0.0428657
	3950	0.012	50.118	1.39	1196.27	1.832	0.0940502	0.0313184	249.62	0.000605938	0.000569197	0.000538419	0.000469405	0.000435841	0.000396737	1.34653	1.26488	1.19649	1.04312	0.968535	0.881638	0.0250855	0.0272898	0.029368	0.0349866	0.0383202	0.0428416
	4000	0	50.692	1.389	1195.5	1.83	0.0933286	0.0312816	251.55	0.000606719	0.000569844	0.000538966	0.000469768	0.000436131	0.000396956	1.34826	1.26632	1.1977	1.04393	0.96918	0.882124	0.0250416	0.0272486	0.029329	0.034953	0.0382894	0.0428141

## Sheet: 钻井液屈服应力对悬浮浓度
	无溶解、无悬浮										不同屈服应力Bn					Vfc
	井深m	环空压耗	环空压力	泥浆流速m/s	平均密度	实际气速	自由气VF	悬浮气体积	气体密度	1300	1	2	6	8	10	1	2	6	8	10	1Pa总体积
	0	0.547	0	0.182	1300	0	0	0	0.68051	0	0	0	0	0	0	0	0	0	0	0
	50	0.547	0.637	0.182	1300	0	0	0	5.0864	0	0	0	0	0	0	0	0	0	0	0
	100	0.547	1.274	0.182	1300	0	0	0	9.6243	0	0	0	0	0	0	0	0	0	0	0
	150	0.547	1.912	0.182	1300	0	0	0	14.301	0	0	0	0	0	0	0	0	0	0	0
	200	0.547	2.549	0.182	1300	0	0	0	19.148	0	0	0	0	0	0	0	0	0	0	0
	250	0.547	3.186	0.182	1300	0	0	0	24.162	0	0	0	0	0	0	0	0	0	0	0
	300	0.546	3.823	0.182	1300	0	0	0	29.34	0	0	0	0	0	0	0	0	0	0	0
	350	0.546	4.46	0.182	1300	0	0	0	34.714	0	0	0	0	0	0	0	0	0	0	0
	400	0.546	5.097	0.182	1300	0	0	0	40.25	0	0	0	0	0	0	0	0	0	0	0
	450	0.546	5.735	0.182	1300	0	0	0	45.951	0	0	0	0	0	0	0	0	0	0	0
	500	0.546	6.372	0.182	1300	0	0	0	51.869	0	0	0	0	0	0	0	0	0	0	0
	550	0.546	7.009	0.182	1300	0	0	0	57.895	0	0	0	0	0	0	0	0	0	0	0
	600	0.545	7.646	0.182	1300	0	0	0	64.071	0	0	0	0	0	0	0	0	0	0	0
	650	0.545	8.283	0.182	1300	0	0	0	70.404	0	0	0	0	0	0	0	0	0	0	0
	700	0.545	8.92	0.182	1300	0	0	0	76.695	0	0	0	0	0	0	0	0	0	0	0
	750	0.545	9.557	0.182	1300	0	0	0	83.009	0	0	0	0	0	0	0	0	0	0	0
	800	0.545	10.195	0.182	1300	0	0	0	89.173	0	0	0	0	0	0	0	0	0	0	0
	850	0.545	10.832	0.182	1300	0	0	0	95.035	0	0	0	0	0	0	0	0	0	0	0
	900	0.545	11.469	0.182	1300	0	0	0	100.05	0	0	0	0	0	0	0	0	0	0	0
	950	0.544	12.106	0.182	1300	0	0	0	104.19	0	0	0	0	0	0	0	0	0	0	0
	1000	0.544	12.743	0.182	1300	0	0	0	107.16	0	0	0	0	0	0	0	0	0	0	0
	1050	0.536	13.388	1.219	1300	0	0	0	110.69	0	0	0	0	0	0	0	0	0	0	0
	1100	0.528	14.034	1.219	1300	0	0	0	115.84	0	0	0	0	0	0	0	0	0	0	0
	1150	0.519	14.679	1.219	1300	0	0	0	120.69	0	0	0	0	0	0	0	0	0	0	0
	1200	0.511	15.325	1.219	1300	0	0	0	125.48	0	0	0	0	0	0	0	0	0	0	0
	1250	0.502	15.97	1.219	1300	0	0	0	130.04	0	0	0	0	0	0	0	0	0	0	0
	1300	0.494	16.615	1.219	1300	0	0	0	134.54	0	0	0	0	0	0	0	0	0	0	0
	1350	0.486	17.261	1.219	1300	0	0	0	138.75	0	0	0	0	0	0	0	0	0	0	0
	1400	0.477	17.906	1.219	1300	0	0	0	142.8	0	0	0	0	0	0	0	0	0	0	0
	1450	0.469	18.552	1.219	1300	0	0	0	146.7	0	0	0	0	0	0	0	0	0	0	0
	1500	0.46	19.197	1.219	1300	0	0	0	150.45	0	0	0	0	0	0	0	0	0	0	0
	1550	0.452	19.842	1.219	1300	0	0	0	154.1	0	0	0	0	0	0	0	0	0	0	0
	1600	0.444	20.488	1.219	1300	0	0	0	157.62	0	0	0	0	0	0	0	0	0	0	0
	1650	0.435	21.133	1.219	1300	0	0	0	161	0	0	0	0	0	0	0	0	0	0	0
	1700	0.427	21.779	1.219	1300	0	0	0	164.25	0	0	0	0	0	0	0	0	0	0	0
	1750	0.419	22.424	1.219	1300	0	0	0	167.37	0	0	0	0	0	0	0	0	0	0	0
	1800	0.41	23.069	1.219	1300	0	0	0	170.28	0	0	0	0	0	0	0	0	0	0	0
	1850	0.402	23.715	1.219	1300	0	0	0	173.08	0	0	0	0	0	0	0	0	0	0	0
	1900	0.393	24.36	1.219	1300	0	0	0	175.77	0	0	0	0	0	0	0	0	0	0	0
	1950	0.385	25.006	1.219	1300	0	0	0	178.36	0	0	0	0	0	0	0	0	0	0	0
	2000	0.377	25.651	1.219	1300	0	0	0	180.85	0	0	0	0	0	0	0	0	0	0	0
	2050	0.368	26.296	1.219	1300	1.612	0	0	183.25	0	0	0	0	0	0	0	0	0	0	0
	2100	0.36	26.942	1.219	1300	1.611	0	0	185.66	0	0	0	0	0	0	0	0	0	0	0
	2150	0.351	27.587	1.219	1300	1.61	0	0	187.99	0	0	0	0	0	0	0	0	0	0	0
	2200	0.343	28.233	1.219	1300	1.609	0	0	190.23	0	0	0	0	0	0	0	0	0	0	0
	2250	0.335	28.878	1.219	1299.99	1.608	0	0	192.31	0	0	0	0	0	0	0	0	0	0	0
	2300	0.326	29.523	1.219	1299.99	1.607	0	0	194.41	0	0	0	0	0	0	0	0	0	0	0
	2350	0.318	30.169	1.219	1299.98	1.606	0	0	196.53	0	0	0	0	0	0	0	0	0	0	0
	2400	0.309	30.814	1.219	1299.96	1.605	0	0	198.49	0	0	0	0	0	0	0	0	0	0	0
	2450	0.301	31.46	1.219	1299.92	1.605	0	0	200.3	0	0	0	0	0	0	0	0	0	0	0
	2500	0.293	32.105	1.219	1299.86	1.604	0	0	202.15	0	0	0	0	0	0	0	0	0	0	0
	2550	0.284	32.75	1.219	1299.76	1.603	0	0	204.02	0	0	0	0	0	0	0	0	0	0	0
	2600	0.276	33.395	1.219	1299.57	1.602	0	0	205.84	0	0	0	0	0	0	0	0	0	0	0
	2650	0.268	34.041	1.219	1299.27	1.601	0	0	207.61	0	0	0	0	0	0	0	0	0	0	0
	2700	0.259	34.685	1.218	1298.78	1.6	0	0	209.33	0	0	0	0	0	0	0	0	0	0	0
	2750	0.251	35.33	1.218	1297.99	1.599	0	0	211.01	0	0	0	0	0	0	0	0	0	0	0
	2800	0.242	35.974	1.218	1296.77	1.599	0	0	212.63	0	0	0	0	0	0	0	0	0	0	0
	2850	0.234	36.617	1.217	1294.9	1.598	0	0	214.21	0	0	0	0	0	0	0	0	0	0	0
	2900	0.226	37.26	1.216	1292.35	1.597	0	0	215.84	0	0	0	0	0	0	0	0	0	0	0
	2950	0.217	37.9	1.215	1288.7	1.596	0	0	217.34	0	0	0	0	0	0	0	0	0	0	0
	3000	0.209	38.539	1.213	1283.85	1.595	0	0	218.88	0	0	0	0	0	0	0	0	0	0	0
	3050	0.201	39.175	1.211	1277.63	1.594	0	0	220.55	0	0	0	0	0	0	0	0	0	0	0	0	0	0	0	0
	3100	0.193	39.807	1.208	1270.01	1.593	0	0.00327874	222.18	0.000505587	0.280882	0.561763	1.68529	2.24705	2.80882	0	0.00327874	0.00327874	0.00327874	0.00327874	0	0.00465182	0.00465182	0.00465182	0.00465182
	3150	0.184	40.436	1.204	1261.11	1.592	0	0.0298867	223.77	0.00050596	0.281089	0.562178	1.68653	2.24871	2.81089	0.097881	0.0687869	0.018271	0.0118378	0.00828851	26.257	0.0975935	0.0259225	0.0167953	0.0117596
	3200	0.176	41.059	1.2	1251.29	1.59	0.0426178	0.0298556	225.33	0.000506327	0.281293	0.562586	1.68776	2.25034	2.81293	0.097881	0.06874	0.0182517	0.0118245	0.0082787	26.44	0.0975269	0.0258952	0.0167763	0.0117457
	3250	0.168	41.678	1.196	1241.1	1.589	0.0874438	0.0298252	226.85	0.000506686	0.281492	0.562984	1.68895	2.25194	2.81492	0.0972252	0.0686942	0.018233	0.0118114	0.00826914	26.44	0.0974621	0.0258686	0.0167578	0.0117321
	3300	0.16	42.291	1.192	1231.27	1.588	0.09052	0.0297939	228.42	0.000507057	0.281698	0.563396	1.69019	2.25359	2.81698	0.0965569	0.0686469	0.0182135	0.0117979	0.00825926	26.44	0.0973949	0.025841	0.0167386	0.0117181
	3350	0.15	42.903	1.312	1222.62	1.737	0.0899138	0.0297631	229.96	0.000507421	0.281901	0.563802	1.6914	2.25521	2.81901	0.0959103	0.0686005	0.0181945	0.0117847	0.00824957	26.44	0.097329	0.025814	0.0167199	0.0117043
	3400	0.139	43.511	1.308	1215.87	1.735	0.0892694	0.0297299	231.62	0.000507816	0.28212	0.564239	1.69272	2.25696	2.8212	0.0952229	0.0685503	0.018174	0.0117704	0.00823912	26.44	0.0972579	0.0257849	0.0166996	0.0116895
	3450	0.128	44.116	1.306	1210.68	1.734	0.0886493	0.0296975	233.24	0.000508201	0.282334	0.564668	1.694	2.25867	2.82334	0.0945615	0.0685014	0.0181539	0.0117564	0.00822891	26.44	0.0971884	0.0257564	0.0166798	0.011675
	3500	0.117	44.719	1.303	1207.02	1.732	0.0874438	0.0296648	234.87	0.00050859	0.28255	0.5651	1.6953	2.2604	2.8255	0.0939053	0.068452	0.0181337	0.0117424	0.00821864	26.44	0.0971184	0.0257277	0.0166599	0.0116604
	3550	0.107	45.321	1.302	1204.46	1.73	0.0862612	0.0296325	236.48	0.000508974	0.282764	0.565527	1.69658	2.26211	2.82764	0.093266	0.0684032	0.0181137	0.0117285	0.00820849	26.44	0.0970492	0.0256994	0.0166402	0.011646
	3600	0.096	45.921	1.301	1202.85	1.729	0.0856429	0.0295998	238.11	0.000509365	0.282981	0.565961	1.69788	2.26384	2.82981	0.0926275	0.0683538	0.0180935	0.0117145	0.0081982	26.44	0.096979	0.0256707	0.0166203	0.0116315
	3650	0.085	46.521	1.3	1201.7	1.727	0.0862612	0.0295663	239.78	0.000509766	0.283203	0.566407	1.69922	2.26563	2.83203	0.0919824	0.068303	0.0180728	0.0117001	0.00818767	26.44	0.096907	0.0256413	0.0165999	0.0116165
	3700	0.075	47.12	1.299	1200.76	1.725	0.0868427	0.0295337	241.4	0.000510156	0.28342	0.56684	1.70052	2.26736	2.8342	0.0913651	0.0682537	0.0180527	0.0116861	0.00817744	26.44	0.0968371	0.0256128	0.01658	0.011602
	3750	0.064	47.719	1.298	1199.96	1.723	0.0874438	0.0295021	242.97	0.000510535	0.28363	0.567261	1.70178	2.26904	2.8363	0.0907747	0.0682059	0.0180331	0.0116726	0.00816752	26.44	0.0967693	0.0255851	0.0165608	0.0115879
	3800	0.047	48.323	1.567	1198.05	2.053	0.096	0.0294703	244.55	0.000510917	0.283843	0.567685	1.70306	2.27074	2.83843	0.0901882	0.0681578	0.0180135	0.0116589	0.00815754	26.44	0.081707	0.0215944	0.0139766	0.0097792
	3850	0.035	48.922	1.391	1197.93	1.836	0.0953489	0.0294366	246.22	0.000511321	0.284067	0.568135	1.7044	2.27254	2.84067	0.0897307	0.0681068	0.0179927	0.0116445	0.00814698	26.4855	0.0816459	0.0215695	0.0139593	0.00976654
	3900	0.023	49.52	1.39	1197.11	1.834	0.0946912	0.0294021	247.93	0.000511737	0.284298	0.568596	1.70579	2.27439	2.84298	0.0892843	0.0680545	0.0179714	0.0116297	0.00813617	26.5368	0.0815832	0.021544	0.0139416	0.00975358
	3950	0.012	50.118	1.39	1196.27	1.832	0.0940502	0.029368	249.62	0.000512148	0.284527	0.569054	1.70716	2.27621	2.84527	0.0888561	0.0680028	0.0179503	0.0116151	0.00812548	26.5895	0.0815212	0.0215187	0.0139241	0.00974076
	4000	0	50.791	1.339	1231.2	1.75	0.0571	0.029329	251.55	0.000512619	0.284789	0.569577	1.70873	2.27831	2.84789	0.0883816	0.0679436	0.0179263	0.0115984	0.00811326	26.652	0.0814503	0.0214899	0.0139041	0.00972612
																					476.241	1.67597	0.447188	0.291186
																			A1	0.0283756	0
																			A2	0.0239758	0.0985815
																					0.0985634
																					0.097881
																					0.0972252
																					0.0965569
																					0.0959103
																					0.0952229
																					0.0945615
																					0.0939053
																					0.093266
																					0.0926275
																					0.0919824
																					0.0913651
																					0.0907747
