# Supplementary material for: A drilling wellbore pressure calculation model considering the effect of gas dissolution and suspension
Source: Frontiers journal article supplement (doi:10.3389/feart.2022.993876), 2022-09-27
Supplement: Data_Sheet_5.xlsx [file Data_Sheet_5.xlsx]

## Sheet: 无溶解无悬浮压力
					溶解		溶解
	时刻	立压		套压	立压	套压	立压	套压
	0	10.156	3.635	3.81675	10.156	4.04	10.156	4.04
	0.5	10.156	3.635	3.81675	10.156	4.04	10.156	4.04
	1	10.156	3.635	3.81675	10.156	4.04	10.156	4.04
	1.5	10.098	3.664	3.8472	10.098	4.04	10.098	4.04
	2	10.041	3.692	3.8766	10.041	4.04	10.041	4.04
	2.5	9.983	3.721	3.90705	9.983	4.04	9.983	4.04
	3	9.927	3.75	3.9375	9.927	4.04	9.927	4.04
	3.5	9.869	3.778	3.9669	9.869	4.04	9.869	4.04
	4	9.813	3.807	3.99735	9.813	4.04	9.813	4.04
	4.5	9.757	3.836	4.0278	9.757	4.04	9.757	4.04
	5	9.699	3.864	4.0572	9.699	4.04	9.699	4.04
	5.5	9.643	3.893	4.08765	9.643	4.04	9.643	4.04
	6	9.584	3.922	4.1181	9.584	4.04	9.584	4.04
	6.5	9.528	3.926	4.1223	9.528	4.04	9.528	4.04
	7	9.47	3.927	4.12335	9.47	4.04	9.47	4.04
	7.5	9.414	3.927	4.12335	9.414	4.04	9.414	4.04
	8	9.358	3.928	4.1244	9.358	4.04	9.358	4.04
	8.5	9.3	3.928	4.1244	9.3	4.04	9.3	4.04
	9	9.244	3.929	4.12545	9.244	4.04	9.244	4.04
	9.5	9.186	3.93	4.1265	9.186	4.04	9.186	4.04
	10	9.129	3.931	4.12755	9.129	4.04	9.129	4.04
	10.5	9.071	3.932	4.1286	9.071	4.04	9.071	4.04
	11	9.015	3.933	4.12965	9.015	4.04	9.015	4.04
	11.5	8.959	3.934	4.1307	8.959	4.04	8.959	4.04
	12	8.901	3.936	4.1328	8.901	4.04	8.901	4.04
	12.5	8.845	3.937	4.13385	8.845	4.04	8.845	4.04
	13	8.787	3.939	4.13595	8.787	4.04	8.787	4.04
	13.5	8.731	3.941	4.13805	8.731	4.04	8.731	4.04
	14	8.672	3.942	4.1391	8.672	4.04	8.672	4.04
	14.5	8.616	3.944	4.1412	8.616	4.04	8.616	4.04
	15	8.56	3.947	4.14435	8.56	4.04	8.56	4.04
	15.5	8.502	3.949	4.14645	8.502	4.04	8.502	4.04
	16	8.446	3.951	4.14855	8.446	4.04	8.446	4.04
	16.5	8.388	3.954	4.1517	8.388	4.04	8.388	4.04
	17	8.332	3.956	4.1538	8.332	4.04	8.332	4.04
	17.5	8.274	3.959	4.15695	8.274	4.04	8.274	4.04
	18	8.218	3.962	4.1601	8.218	4.04	8.218	4.04
	18.5	8.161	3.964	4.1622	8.161	4.04	8.161	4.04
	19	8.103	3.967	4.16535	8.103	4.04	8.103	4.04
	19.5	8.047	3.97	4.1685	8.047	4.04	8.047	4.04
	20	7.989	3.973	4.17165	7.989	4.04	7.989	4.04
	20.5	7.933	3.975	4.17375	7.933	4.045	7.933	4.044
	21	7.875	3.979	4.17795	7.875	4.05	7.875	4.048
	21.5	7.819	3.981	4.18005	7.819	4.055	7.819	4.052
	22	7.763	3.985	4.18425	7.763	4.06	7.763	4.056
	22.5	7.704	3.988	4.1874	7.704	4.065	7.704	4.06
	23	7.648	3.991	4.19055	7.648	4.07	7.648	4.064
	23.5	7.59	3.994	4.1937	7.59	4.075	7.59	4.068
	24	7.534	3.997	4.19685	7.534	4.08	7.534	4.072
	24.5	7.476	4.001	4.20105	7.476	4.085	7.476	4.076
	25	7.42	4.004	4.2042	7.42	4.09	7.42	4.08
	25.5	7.364	4.008	4.2084	7.364	4.095	7.364	4.084
	26	7.306	4.011	4.21155	7.306	4.1	7.306	4.088
	26.5	7.249	4.015	4.21575	7.249	4.105	7.249	4.092
	27	7.191	4.019	4.21995	7.191	4.11	7.191	4.096
	27.5	7.135	4.023	4.22415	7.135	4.115	7.135	4.1
	28	7.077	4.028	4.2294	7.077	4.12	7.077	4.104
	28.5	7.021	4.033	4.23465	7.021	4.125	7.021	4.108
	29	6.963	4.04	4.242	6.963	4.13	6.963	4.112
	29.5	6.907	4.047	4.24935	6.907	4.135	6.907	4.116
	30	6.851	4.056	4.2588	6.851	4.14	6.851	4.12
	30.5	6.792	4.066	4.2693	6.792	4.145	6.792	4.124
	31	6.736	4.078	4.2819	6.736	4.15	6.736	4.128
	31.5	6.689	4.092	4.2966	6.689	4.155	6.689	4.132
	32	6.648	4.108	4.3134	6.648	4.16	6.648	4.136
	32.5	6.609	4.127	4.33335	6.609	4.165	6.609	4.14
	33	6.568	4.149	4.35645	6.568	4.17	6.568	4.144
	33.5	6.529	4.173	4.38165	6.529	4.175	6.529	4.148
	34	6.488	4.202	4.4121	6.488	4.18	6.488	4.152
	34.5	6.447	4.23	4.4415	6.447	4.185	6.447	4.156
	35	6.409	4.259	4.47195	6.409	4.19	6.409	4.16
	35.5	6.368	4.287	4.50135	6.368	4.195	6.368	4.165
	36	6.329	4.315	4.53075	6.329	4.2	6.329	4.17
	36.5	6.288	4.343	4.56015	6.288	4.205	6.288	4.175
	37	6.249	4.372	4.5906	6.249	4.21	6.249	4.18
	37.5	6.244	4.446	4.6683	6.244	4.22	6.244	4.185
	38	6.244	4.526	4.7523	6.244	4.23	6.244	4.19
	38.5	6.244	4.595	4.82475	6.244	4.24	6.244	4.195
	39	6.244	4.651	4.88355	6.244	4.25	6.244	4.2
	39.5	6.244	4.678	4.9119	6.244	4.26	6.244	4.205
	40	6.244	4.706	4.9413	6.244	4.27	6.244	4.21
	40.5	6.244	4.752	4.9896	6.244	4.28	6.244	4.215
	41	6.244	4.819	5.05995	6.244	4.29	6.244	4.22
	41.5	6.244	4.869	5.11245	6.244	4.3	6.244	4.225
	42	6.244	4.896	5.1408	6.244	4.31	6.244	4.23
	42.5	6.244	4.922	5.1681	6.244	4.32	6.244	4.235
	43	6.244	5.012	5.2626	6.244	4.33	6.244	4.24
	43.5	6.244	5.037	5.28885	6.244	4.34	6.244	4.245
	44	6.244	5.063	5.31615	6.244	4.35	6.244	4.25
	44.5	6.244	5.138	5.3949	6.244	4.36	6.244	4.255
	45	6.244	5.164	5.4222	6.244	4.37	6.244	4.26
	45.5	6.244	5.189	5.44845	6.244	4.38	6.244	4.265
	46	6.244	5.244	5.5062	6.244	4.39	6.244	4.27
	46.5	6.244	5.268	5.5314	6.244	4.4	6.244	4.28
	47	6.244	5.293	5.55765	6.244	4.41	6.244	4.29
	47.5	6.244	5.325	5.59125	6.244	4.42	6.244	4.3
	48	6.244	5.341	5.60805	6.244	4.43	6.244	4.31
	48.5	6.244	5.358	5.6259	6.244	4.44	6.244	4.32
	49	6.244	5.365	5.63325	6.244	4.45	6.244	4.33
	49.5	6.244	5.372	5.6406	6.244	4.46	6.244	4.34
	50	6.244	5.373	5.64165	6.244	4.47	6.244	4.35
	50.5	6.244	5.367	5.63535	6.244	4.48	6.244	4.36
	51	6.244	5.36	5.628	6.244	4.49	6.244	4.37
	51.5	6.244	5.347	5.61435	6.244	4.5	6.244	4.38
	52	6.244	5.326	5.5923	6.244	4.51	6.244	4.39
	52.5	6.244	5.305	5.57025	6.244	4.52	6.244	4.405
	53	6.244	5.277	5.54085	6.244	4.53	6.244	4.42
	53.5	6.244	5.242	5.5041	6.244	4.54	6.244	4.435
	54	6.244	5.206	5.4663	6.244	4.55	6.244	4.45
	54.5	6.244	5.165	5.42325	6.244	4.56	6.244	4.465
	55	6.244	5.115	5.37075	6.244	4.57	6.244	4.48
	55.5	6.244	5.066	5.3193	6.244	4.58	6.244	4.495
	56	6.244	5.011	5.26155	6.244	4.59	6.244	4.51
	56.5	6.244	4.948	5.1954	6.244	4.62	6.244	4.525
	57	6.244	4.886	5.1303	6.244	4.65	6.244	4.545
	57.5	6.244	4.818	5.0589	6.244	4.68	6.244	4.565
	58	6.244	4.744	4.9812	6.244	4.71	6.244	4.585
	58.5	6.244	4.671	4.90455	6.244	4.74	6.244	4.605
	59	6.244	4.592	4.8216	6.244	4.77	6.244	4.625
	59.5	6.244	4.511	4.73655	6.244	4.8	6.244	4.645
	60	6.244	4.427	4.64835	6.244	4.83	6.244	4.665
	60.5	6.244	4.343	4.56015	6.244	4.86	6.244	4.685
	61	6.244	4.254	4.4667	6.244	4.89	6.244	4.705
	61.5	6.244	4.166	4.3743	6.244	4.95	6.244	4.725
	62	6.244	4.073	4.27665	6.244	5.01	6.244	4.745
	62.5	6.244	3.983	4.18215	6.244	5.07	6.244	4.765
	63	6.244	3.889	4.08345	6.244	5.14	6.244	4.8
	63.5	6.244	3.797	3.98685	6.244	5.21	6.244	4.84
	64	6.244	3.702	3.8871	6.244	5.28	6.244	4.89
	64.5	6.244	3.608	3.7884	6.244	5.35	6.244	4.94
	65	6.244	3.517	3.69285	6.244	5.42	6.244	5
	65.5	6.244	3.424	3.5952	6.244	5.49	6.244	5.06
	66	6.244	3.336	3.5028	6.244	5.55	6.244	5.12
	66.5	6.244	3.246	3.4083	6.244	5.61	6.244	5.18
	67	6.244	3.16	3.318	6.244	5.66	6.244	5.25
	67.5	6.244	3.075	3.22875	6.244	5.71	6.244	5.3
	68	6.244	2.994	3.1437	6.244	5.75	6.244	5.34
	68.5	6.244	2.913	3.05865	6.244	5.79	6.244	5.38
	69	6.244	2.835	2.97675	6.244	5.83	6.244	5.41
	69.5	6.244	2.763	2.90115	6.244	5.85	6.244	5.44
	70	6.244	2.691	2.82555	6.244	5.87	6.244	5.46
	70.5	6.244	2.625	2.75625	6.244	5.9	6.244	5.48
	71	6.244	2.56	2.688	6.244	5.91	6.244	5.5
	71.5	6.244	2.502	2.6271	6.244	5.9	6.244	5.51
	72	6.244	2.444	2.5662	6.244	5.87	6.244	5.52
	72.5	6.244	2.392	2.5116	6.244	5.85	6.244	5.53
	73	6.244	2.342	2.4591	6.244	5.81	6.244	5.54
	73.5	6.244	2.295	2.40975	6.244	5.77	6.244	5.5405
	74	6.244	2.254	2.3667	6.244	5.72	6.244	5.55
	74.5	6.244	2.214	2.3247	6.244	5.67	6.244	5.54
	75	6.244	2.179	2.28795	6.244	5.62	6.244	5.52
	75.5	6.244	2.146	2.2533	6.244	5.55	6.244	5.5
	76	6.244	2.117	2.22285	6.244	5.467	6.244	5.48
	76.5	6.244	2.088	2.1924	6.244	5.3743	6.244	5.44
	77	6.244	2.064	2.1672	6.244	5.22767	6.244	5.36
	77.5	6.244	2.04	2.142	6.244	5.01821	6.244	5.27
	78	6.244	2.017	2.11785	6.244	4.48345	6.244	5.14
	78.5	6.244	1.997	2.09685	6.244	4.11987	6.244	4.92
	79	6.244	1.977	2.07585	6.244	3.57585	6.244	4.57585
	79.5	6.244	1.959	2.05695	6.244	2.85695	6.244	3.85695
	80	6.244	1.94	2.037	6.244	2.437	6.244	2.437
	80.5	6.244	1.924	2.0202	6.244	2.2202	6.244	2.2202
	81	6.244	1.905	2.00025	6.244	2.09025	6.244	2.09025
	81.5	6.244	1.89	1.9845	6.244	2.05985	6.244	2.05985
	82	6.244	1.872	1.9656	6.244	2.01966	6.244	2.01966
	82.5	6.244	1.854	1.9467	6.244	1.9767	6.244	1.9767
	83	6.244	1.839	1.93095	6.244	1.94095	6.244	1.94095
	83.5	6.244	1.822	1.9131	6.244	1.9131	6.244	1.9131
	84	6.244	1.807	1.89735	6.244	1.89735	6.244	1.89735
	84.5	6.244	1.789	1.87845	6.244	1.87845	6.244	1.87845
	85	6.244	1.774	1.8627	6.244	1.8627	6.244	1.8627
	85.5	6.244	1.757	1.84485	6.244	1.84485	6.244	1.84485
	86	6.244	1.741	1.82805	6.244	1.82805	6.244	1.82805
	86.5	6.244	1.724	1.8102	6.244	1.8102	6.244	1.8102
	87	6.244	1.707	1.79235	6.244	1.79235	6.244	1.79235
	87.5	6.244	1.692	1.7766	6.244	1.7766	6.244	1.7766
	88	6.244	1.674	1.7577	6.244	1.7577	6.244	1.7577
	88.5	6.244	1.659	1.74195	6.244	1.74195	6.244	1.74195
	89	6.244	1.642	1.7241	6.244	1.7241	6.244	1.7241
	89.5	6.244	1.626	1.7073	6.244	1.7073	6.244	1.7073
	90	6.244	1.609	1.68945	6.244	1.68945	6.244	1.68945
	90.5	6.244	1.594	1.6737	6.244	1.6737	6.244	1.6737
	91	6.244	1.577	1.65585	6.244	1.65585	6.244	1.65585
	91.5	6.244	1.559	1.63695	6.244	1.63695	6.244	1.63695
	92	6.244	1.544	1.6212	6.244	1.6212	6.244	1.6212
	92.5	6.244	1.527	1.60335	6.244	1.60335	6.244	1.60335
	93	6.244	1.511	1.58655	6.244	1.58655	6.244	1.58655
	93.5	6.244	1.494	1.5687	6.244	1.5687	6.244	1.5687
	94	6.244	1.479	1.55295	6.244	1.55295	6.244	1.55295
	94.5	6.244	1.461	1.53405	6.244	1.53405	6.244	1.53405
	95	6.244	1.446	1.5183	6.244	1.5183	6.244	1.5183
	95.5	6.244	1.429	1.50045	6.244	1.50045	6.244	1.50045
	96	6.244	1.411	1.48155	6.244	1.48155	6.244	1.48155
	96.5	6.244	1.396	1.4658	6.244	1.4658	6.244	1.4658
	97	6.244	1.379	1.44795	6.244	1.44795	6.244	1.44795
	97.5	6.244	1.364	1.4322	6.244	1.4322	6.244	1.4322
	98	6.244	1.346	1.4133	6.244	1.4133	6.244	1.4133
	98.5	6.244	1.331	1.39755	6.244	1.39755	6.244	1.39755
	99	6.244	1.314	1.3797	6.244	1.3797	6.244	1.3797
	99.5	6.244	1.299	1.36395	6.244	1.36395	6.244	1.36395
	100	6.244	1.281	1.34505	6.244	1.34505	6.244	1.34505
	100.5	6.244	1.264	1.3272	6.244	1.3272	6.244	1.3272
	101	6.244	1.249	1.31145	6.244	1.31145	6.244	1.31145
	101.5	6.244	1.231	1.29255	6.244	1.29255	6.244	1.29255
	102	6.244	1.216	1.2768	6.244	1.2768	6.244	1.2768
	102.5	6.244	1.199	1.25895	6.244	1.25895	6.244	1.25895
	103	6.244	1.183	1.24215	6.244	1.24215	6.244	1.24215
	103.5	6.244	1.166	1.2243	6.244	1.2243	6.244	1.2243
	104	6.244	1.151	1.20855	6.244	1.20855	6.244	1.20855
	104.5	6.244	1.133	1.18965	6.244	1.18965	6.244	1.18965
	105	6.244	1.116	1.1718	6.244	1.1718	6.244	1.1718
	105.5	6.244	1.101	1.15605	6.244	1.15605	6.244	1.15605
	106	6.244	1.083	1.13715	6.244	1.13715	6.244	1.13715
	106.5	6.244	1.068	1.1214	6.244	1.1214	6.244	1.1214
	107	6.244	1.051	1.10355	6.244	1.10355	6.244	1.10355
	107.5	6.244	1.036	1.0878	6.244	1.0878	6.244	1.0878
	108	6.244	1.018	1.0689	6.244	1.0689	6.244	1.0689
	108.5	6.244	1.003	1.05315	6.244	1.05315	6.244	1.05315
	109	6.244	0.986	1.0353	6.244	1.0353	6.244	1.0353
	109.5	6.244	0.968	1.0164	6.244	1.0164	6.244	1.0164
	110	6.244	0.953	1.00065	6.244	1.00065	6.244	1.00065
	110.5	6.244	0.936	0.9828	6.244	0.9828	6.244	0.9828
	111	6.244	0.921	0.96705	6.244	0.96705	6.244	0.96705
	111.5	6.244	0.903	0.94815	6.244	0.94815	6.244	0.94815
	112	6.244	0.888	0.9324	6.244	0.9324	6.244	0.9324
	112.5	6.244	0.871	0.91455	6.244	0.91455	6.244	0.91455
	113	6.244	0.855	0.89775	6.244	0.89775	6.244	0.89775
	113.5	6.244	0.838	0.8799	6.244	0.8799	6.244	0.8799
	114	6.244	0.821	0.86205	6.244	0.86205	6.244	0.86205
	114.5	6.244	0.805	0.84525	6.244	0.84525	6.244	0.84525
	115	6.244	0.788	0.8274	6.244	0.8274	6.244	0.8274
	115.5	6.244	0.773	0.81165	6.244	0.81165	6.244	0.81165
	116	6.244	0.755	0.79275	6.244	0.79275	6.244	0.79275
	116.5	6.244	0.74	0.777	6.244	0.777	6.244	0.777
	117	6.244	0.723	0.75915	6.244	0.75915	6.244	0.75915
	117.5	6.244	0.708	0.7434	6.244	0.7434	6.244	0.7434
	118	6.244	0.69	0.7245	6.244	0.7245	6.244	0.7245
	118.5	6.244	0.673	0.70665	6.244	0.70665	6.244	0.70665
	119	6.244	0.658	0.6909	6.244	0.6909	6.244	0.6909
	119.5	6.244	0.64	0.672	6.244	0.672	6.244	0.672
	120	6.244	0.625	0.65625	6.244	0.65625	6.244	0.65625
	120.5	6.244	0.608	0.6384	6.244	0.6384	6.244	0.6384
	121	6.244	0.592	0.6216	6.244	0.6216	6.244	0.6216
	121.5	6.244	0.575	0.60375	6.244	0.60375	6.244	0.60375
	122	6.244	0.56	0.588	6.244	0.588	6.244	0.588
	122.5	6.244	0.542	0.5691	6.244	0.5691	6.244	0.5691
	123	6.244	0.525	0.55125	6.244	0.55125	6.244	0.55125
	123.5	6.244	0.51	0.5355	6.244	0.5355	6.244	0.5355
	124	6.244	0.493	0.51765	6.244	0.51765	6.244	0.51765
	124.5	6.244	0.477	0.50085	6.244	0.50085	6.244	0.50085
	125	6.244	0.46	0.483	6.244	0.483	6.244	0.483
	125.5	6.244	0.445	0.46725	6.244	0.46725	6.244	0.46725
	126	6.244	0.427	0.44835	6.244	0.44835	6.244	0.44835
	126.5	6.244	0.412	0.4326	6.244	0.4326	6.244	0.4326
	127	6.244	0.395	0.41475	6.244	0.41475	6.244	0.41475
	127.5	6.244	0.377	0.39585	6.244	0.39585	6.244	0.39585
	128	6.244	0.362	0.3801	6.244	0.3801	6.244	0.3801
	128.5	6.244	0.345	0.36225	6.244	0.36225	6.244	0.36225
	129	6.244	0.33	0.3465	6.244	0.3465	6.244	0.3465
	129.5	6.244	0.312	0.3276	6.244	0.3276	6.244	0.3276
	130	6.244	0.297	0.31185	6.244	0.31185	6.244	0.31185
	130.5	6.244	0.28	0.294	6.244	0.294	6.244	0.294
	131	6.244	0.264	0.2772	6.244	0.2772	6.244	0.2772
	131.5	6.244	0.247	0.25935	6.244	0.25935	6.244	0.25935
	132	6.244	0.23	0.2415	6.244	0.2415	6.244	0.2415
	132.5	6.244	0.214	0.2247	6.244	0.2247	6.244	0.2247
	133	6.244	0.197	0.20685	6.244	0.20685	6.244	0.20685
	133.5	6.244	0.182	0.1911	6.244	0.1911	6.244	0.1911
	134	6.244	0.164	0.1722	6.244	0.1722	6.244	0.1722
	134.5	6.244	0.149	0.15645	6.244	0.15645	6.244	0.15645
	135	6.244	0.132	0.1386	6.244	0.1386	6.244	0.1386
	135.5	6.244	0.092	0.0966	6.244	0.0966	6.244	0.0966
	136	6.244	0.029	0.03045	6.244	0.03045	6.244	0.03045
	136.5	6.244	0.009	0.00945	6.244	0.00945	6.244	0.00945
	137	6.244	0.047	0.04935	6.244	0.04935	6.244	0.04935
	137.5	6.244	0.007	0.00735	6.244	0.00735	6.244	0.00735
	138	6.244	0.004	0.0042	6.244	0.0042	6.244	0.0042
	138.5	6.244	0.004	0.0042	6.244	0.0042	6.244	0.0042
	139	6.244	0.002	0.0021	6.244	0.0021	6.244	0.0021
	139.5	6.244	0.002	0.0021	6.244	0.0021	6.244	0.0021
	140	6.244	0.002	0.0021	6.244	0.0021	6.244	0.0021
	140.5	6.244	0.001	0.00105	6.244	0.00105	6.244	0.00105
	141	6.244	0.001	0.00105	6.244	0.00105	6.244	0.00105
	141.5	6.244	0.08	0.084	6.244	0.084	6.244	0.084
	142	6.244	0.019	0.01995	6.244	0.01995	6.244	0.01995
	142.5	6.244	0.057	0.05985	6.244	0.05985	6.244	0.05985
	143	6.244	0.017	0.01785	6.244	0.01785	6.244	0.01785
	143.5	6.244	0.055	0.05775	6.244	0.05775	6.244	0.05775
	144	6.244	0.014	0.0147	6.244	0.0147	6.244	0.0147
	144.5	6.244	0.055	0.05775	6.244	0.05775	6.244	0.05775
	145	6.244	0.055	0.05775	6.244	0.05775	6.244	0.05775

## Sheet: 无溶解无悬浮气体
	井深	环空压耗	环空压力	泥浆流速	平均密度	气相实际速度	气象体积分数	钻杆内压力	t体积		26.5min	井深	环空压耗	环空压力	泥浆流速	平均密度	气相实际速度	气象体积分数	钻杆内压力		31min	井深	环空压耗	环空压力	泥浆流速	平均密度	气相实际速度	气象体积分数	钻杆内压力			50min	井深	环空压耗	环空压力	泥浆流速	平均密度	气相实际速度	气象体积分数	钻杆内压力
	0	1.946	3.819	1.873	1300	0	0	10.084		0		0	1.99	3.929	1.904	1300	2.392	0	7.632	0		0	2.013	4.023	1.934	1298.56	2.426	0.001	7.138	0.0013			0	1.996	5.202	2.353	935.53	3.172	0.288	6.487	0.3744
	50	1.873	4.54	1.873	1300	0	0	10.718		0		50	1.915	4.641	1.904	1300	2.39	0	8.266	0		50	1.936	4.736	1.934	1298.25	2.424	0.001	7.773	0.0013			50	1.903	5.759	2.283	959.24	3.061	0.271	7.121	0.3523
	100	1.799	5.257	1.873	1300	0	0	11.352		0		100	1.838	5.354	1.904	1300	2.388	0	8.9	0		100	1.858	5.45	1.933	1297.89	2.421	0.002	8.407	0.0026			100	1.813	6.325	2.224	980.29	2.968	0.255	7.755	0.3315
	150	1.725	5.968	1.873	1300	0	0	11.986		0		150	1.762	6.068	1.904	1300	2.387	0	9.534	0		150	1.779	6.165	1.932	1297.49	2.419	0.002	9.041	0.0026			150	1.726	6.897	2.173	999.04	2.888	0.241	8.39	0.3133
	200	1.651	6.68	1.873	1300	0	0	12.62		0		200	1.686	6.781	1.904	1300	2.385	0	10.168	0		200	1.701	6.879	1.931	1297.04	2.417	0.002	9.675	0.0026			200	1.641	7.476	2.129	1015.87	2.82	0.228	9.024	0.2964
	250	1.576	7.391	1.873	1300	0	0	13.254		0		250	1.609	7.494	1.904	1300	2.384	0	10.802	0		250	1.623	7.592	1.931	1296.55	2.415	0.003	10.309	0.0039			250	1.559	8.059	2.09	1031.08	2.761	0.216	9.658	0.2808
	300	1.502	8.102	1.873	1300	0	0	13.888		0		300	1.533	8.208	1.904	1300	2.382	0	11.437	0		300	1.545	8.305	1.93	1296	2.412	0.003	10.943	0.0039			300	1.479	8.648	2.057	1044.9	2.709	0.206	10.292	0.2678
	350	1.428	8.813	1.873	1300	0	0	14.522		0		350	1.456	8.921	1.904	1300	2.38	0	12.071	0		350	1.467	9.018	1.929	1295.4	2.41	0.004	11.577	0.0052			350	1.401	9.242	2.027	1057.54	2.663	0.197	10.926	0.2561
	400	1.354	9.524	1.873	1300	0	0	15.156		0		400	1.38	9.634	1.904	1300	2.379	0	12.705	0		400	1.389	9.731	1.928	1294.75	2.408	0.004	12.211	0.0052			400	1.324	9.84	2.001	1069.16	2.622	0.188	11.56	0.2444
	450	1.28	10.235	1.873	1300	0	0	15.79		0		450	1.304	10.348	1.904	1300	2.377	0	13.339	0		450	1.311	10.443	1.927	1294.04	2.405	0.005	12.845	0.0065			450	1.249	10.442	1.978	1079.89	2.586	0.18	12.194	0.234
	500	1.206	10.947	1.873	1300	0	0	16.424		0		500	1.227	11.061	1.904	1300	2.376	0	13.973	0		500	1.233	11.155	1.926	1293.26	2.403	0.005	13.479	0.0065			500	1.174	11.049	1.958	1089.87	2.554	0.172	12.828	0.2236
	550	1.131	11.658	1.873	1300	0	0	17.058		0		550	1.151	11.775	1.904	1300	2.375	0	14.607	0		550	1.156	11.866	1.925	1292.42	2.4	0.006	14.113	0.0078			550	1.101	11.658	1.939	1099.18	2.525	0.165	13.462	0.2145
	600	1.057	12.369	1.873	1300	0	0	17.692		0		600	1.074	12.488	1.904	1300.01	2.373	0	15.241	0		600	1.078	12.576	1.923	1291.52	2.398	0.007	14.747	0.0091			600	1.028	12.272	1.923	1107.91	2.499	0.159	14.096	0.2067
	650	0.983	13.08	1.873	1300	0	0	18.326		0		650	0.998	13.201	1.904	1300.01	2.372	0	15.875	0		650	1.001	13.286	1.922	1290.56	2.396	0.008	15.381	0.0104			650	0.957	12.889	1.908	1116.14	2.475	0.152	14.73	0.1976
	700	0.909	13.791	1.873	1300	0	0	18.921		0		700	0.922	13.915	1.904	1300.01	2.37	0	16.509	0		700	0.923	13.996	1.921	1289.54	2.393	0.009	16.015	0.0117			700	0.886	13.509	1.895	1123.94	2.454	0.146	15.364	0.1898
	750	0.835	14.502	1.873	1300	0	0	19.502		0		750	0.845	14.628	1.905	1299.78	2.369	0	17.143	0		750	0.846	14.705	1.919	1288.47	2.391	0.01	16.649	0.013			750	0.815	14.132	1.884	1131.34	2.434	0.141	15.998	0.1833
	800	0.76	15.214	1.873	1300	0	0	20.082		0		800	0.769	15.341	1.905	1299.57	2.368	0	17.777	0		800	0.769	15.413	1.918	1287.34	2.388	0.011	17.283	0.0143			800	0.745	14.758	1.873	1138.42	2.417	0.135	16.632	0.1755
	850	0.686	15.925	1.873	1300	0	0	20.662		0		850	0.693	16.055	1.904	1299.35	2.366	0	18.411	0		850	0.692	16.12	1.917	1286.16	2.386	0.012	17.917	0.0156			850	0.676	15.387	1.864	1145.19	2.401	0.13	17.266	0.169
	900	0.612	16.636	1.873	1300	0	0	21.242		0		900	0.616	16.767	1.904	1299.08	2.365	0	19.045	0		900	0.616	16.827	1.915	1284.94	2.383	0.013	18.551	0.0169			900	0.607	16.019	1.856	1151.72	2.386	0.125	17.9	0.1625
	950	0.538	17.347	1.873	1300	0	0	21.822		0		950	0.54	17.48	1.904	1298.76	2.363	0	19.679	0		950	0.539	17.533	1.913	1283.66	2.381	0.014	19.185	0.0182			950	0.538	16.653	1.849	1158.01	2.373	0.12	18.534	0.156
	1000	0.464	18.058	1.873	1300	0	0	22.402		0		1000	0.464	18.193	1.904	1298.4	2.362	0	20.313	0		1000	0.463	18.238	1.912	1282.34	2.378	0.015	19.819	0.0195			1000	0.47	17.291	1.842	1164.11	2.361	0.115	19.168	0.1495
	1050	0.455	18.708	0.535	1300	0	0	22.982		0		1050	0.455	18.842	0.543	1297.74	0.913	0.0012	20.947	0.00156		1050	0.454	18.88	0.543	1283.61	0.918	0.016	20.454	0.0208			1050	0.462	17.892	0.509	1206.67	0.91	0.08	19.802	0.104
	1100	0.448	19.352	0.535	1300	0	0	23.562		0		1100	0.448	19.485	0.543	1296.32	0.912	0.003	21.581	0.0039		1100	0.447	19.516	0.541	1279.67	0.916	0.018	21.088	0.0234			1100	0.455	18.491	0.509	1214.11	0.906	0.073	20.436	0.0949
	1150	0.441	19.996	0.535	1300	0	0	24.143		0		1150	0.441	20.127	0.542	1294.42	0.911	0.005	22.215	0.0065		1150	0.44	20.149	0.539	1275.29	0.914	0.021	21.722	0.0273			1150	0.448	19.095	0.51	1222.13	0.903	0.067	21.071	0.0871
	1200	0.434	20.64	0.535	1300	0	0	24.723		0		1200	0.433	20.768	0.541	1292.14	0.909	0.007	22.849	0.0091		1200	0.433	20.78	0.537	1270.51	0.913	0.026	22.356	0.0338			1200	0.442	19.703	0.512	1230.55	0.899	0.06	21.705	0.078
	1250	0.427	21.284	0.535	1300	0	0	25.303		0		1250	0.426	21.407	0.54	1289.42	0.908	0.009	23.483	0.0117		1250	0.426	21.408	0.535	1265.41	0.911	0.03	22.99	0.039			1250	0.435	20.314	0.514	1239.22	0.896	0.052	22.339	0.0676
	1300	0.42	21.928	0.535	1300	0	0	25.883		0		1300	0.419	22.045	0.539	1286.24	0.907	0.012	24.118	0.0156		1300	0.418	22.034	0.532	1260.08	0.909	0.035	23.624	0.0455			1300	0.428	20.931	0.515	1247.9	0.894	0.045	22.973	0.0585
	1350	0.413	22.572	0.535	1300	0	0	26.463		0		1350	0.412	22.682	0.538	1282.58	0.905	0.015	24.752	0.0195		1350	0.411	22.657	0.529	1254.65	0.907	0.04	24.258	0.052			1350	0.422	21.551	0.517	1256.37	0.891	0.038	23.607	0.0494
	1400	0.406	23.216	0.535	1300	0	0	27.043		0		1400	0.405	23.316	0.536	1278.44	0.904	0.019	25.386	0.0247		1400	0.405	23.277	0.527	1249.24	0.905	0.044	24.892	0.0572			1400	0.415	22.175	0.519	1264.41	0.889	0.031	24.241	0.0403
	1450	0.399	23.86	0.535	1300	0	0	27.623		0		1450	0.398	23.949	0.534	1273.85	0.902	0.023	26.02	0.0299		1450	0.398	23.895	0.524	1244.02	0.902	0.049	25.526	0.0637			1450	0.408	22.803	0.521	1271.82	0.887	0.025	24.875	0.0325
	1500	0.392	24.504	0.535	1300	0	0	28.203		0		1500	0.391	24.579	0.532	1268.89	0.9	0.027	26.654	0.0351		1500	0.391	24.51	0.522	1239.14	0.9	0.054	26.16	0.0702			1500	0.401	23.435	0.523	1278.42	0.886	0.019	25.509	0.0247
	1550	0.385	25.148	0.535	1300	0	0	28.784		0		1550	0.384	25.206	0.53	1263.63	0.899	0.032	27.288	0.0416		1550	0.384	25.123	0.519	1234.74	0.898	0.058	26.794	0.0754			1550	0.395	24.07	0.524	1284.1	0.884	0.014	26.143	0.0182
	1600	0.378	25.792	0.535	1300	0	0	29.364		0		1600	0.377	25.831	0.527	1258.23	0.897	0.037	27.922	0.0481		1600	0.377	25.734	0.517	1230.94	0.896	0.061	27.428	0.0793			1600	0.388	24.707	0.526	1288.81	0.883	0.01	26.777	0.013
	1650	0.371	26.436	0.535	1300	0	0	29.944		0		1650	0.37	26.453	0.525	1252.83	0.895	0.042	28.556	0.0546		1650	0.37	26.343	0.515	1227.83	0.894	0.064	28.062	0.0832			1650	0.381	25.346	0.527	1292.56	0.882	0.007	27.411	0.0091
	1700	0.364	27.08	0.535	1300	0	0	30.524		0		1700	0.363	27.073	0.523	1247.59	0.893	0.047	29.19	0.0611		1700	0.364	26.951	0.513	1225.48	0.891	0.066	28.696	0.0858			1700	0.374	25.987	0.527	1295.43	0.88	0.004	28.045	0.0052
	1750	0.357	27.724	0.535	1300	0	0	31.104		0		1750	0.356	27.69	0.52	1242.7	0.891	0.051	29.824	0.0663		1750	0.357	27.558	0.512	1223.92	0.889	0.068	29.33	0.0884			1750	0.367	26.629	0.528	1297.38	0.879	0.002	28.679	0.0026
	1800	0.35	28.368	0.535	1300	0	0	31.684		0		1800	0.349	28.304	0.518	1238.3	0.889	0.055	30.458	0.0715		1800	0.35	28.164	0.511	1223.18	0.887	0.069	29.964	0.0897			1800	0.36	27.272	0.528	1298.65	0.878	0.001	29.313	0.0013
	1850	0.343	29.012	0.535	1300	0.884	0	32.264		0		1850	0.343	28.917	0.516	1234.51	0.887	0.059	31.092	0.0767		1850	0.344	28.77	0.51	1223.27	0.885	0.069	30.598	0.0897			1850	0.353	27.916	0.529	1299.35	0.877	0.001	29.947	0.0013
	1900	0.336	29.656	0.535	1300	0.883	0	32.844		0		1900	0.336	29.528	0.514	1231.44	0.886	0.061	31.726	0.0793		1900	0.337	29.376	0.509	1224.2	0.883	0.068	31.232	0.0884			1900	0.347	28.559	0.529	1299.73	0.876	0	30.581	0
	1950	0.329	30.3	0.535	1300	0.882	0	33.424		0		1950	0.329	30.137	0.513	1229.12	0.884	0.064	32.36	0.0832		1950	0.33	29.983	0.509	1226	0.881	0.066	31.866	0.0858			1950	0.34	29.203	0.529	1300.01	0.875	0	31.215	0
	2000	0.322	30.944	0.535	1300.01	0.881	0	34.005		0		2000	0.323	30.746	0.511	1227.6	0.882	0.065	32.994	0.0845		2000	0.324	30.591	0.509	1228.7	0.879	0.064	32.5	0.0832			2000	0.333	29.847	0.529	1300	0	0	31.849	0
	2050	0.315	31.588	0.535	1300.01	0.88	0	34.585		0		2050	0.316	31.354	0.51	1226.85	0.88	0.066	33.628	0.0858		2050	0.317	31.201	0.51	1232.33	0.877	0.061	33.134	0.0793			2050	0.326	30.491	0.529	1300	0	0	32.483	0
	2100	0.308	32.232	0.535	1299.71	0.879	0	35.165		0		2100	0.309	31.962	0.51	1226.91	0.878	0.066	34.262	0.0858		2100	0.311	31.812	0.511	1236.89	0.875	0.057	33.768	0.0741			2100	0.319	31.135	0.529	1300	0	0	33.117	0
	2150	0.301	32.876	0.535	1299.33	0.878	0	35.745		0		2150	0.303	32.57	0.509	1227.79	0.876	0.065	34.896	0.0845		2150	0.304	32.426	0.512	1242.37	0.873	0.052	34.402	0.0676			2150	0.312	31.779	0.529	1300	0	0	33.751	0
	2200	0.294	33.52	0.535	1298.86	0.877	0	36.325	0	0		2200	0.296	33.178	0.509	1229.52	0.874	0.064	35.53	0.0832		2200	0.297	33.043	0.514	1248.66	0.872	0.047	35.036	0.0611			2200	0.305	32.423	0.529	1300	0	0	34.385	0
	2250	0.287	34.163	0.535	1298.13	0.876	0.001	36.905	0.00141878	0.0013		2250	0.29	33.788	0.51	1232.15	0.872	0.062	36.164	0.0806		2250	0.291	33.663	0.516	1255.58	0.87	0.04	35.67	0.052			2250	0.298	33.066	0.529	1300	0	0	35.019	0
	2300	0.28	34.806	0.534	1297.04	0.875	0.002	37.485	0.00283756	0.0026		2300	0.283	34.399	0.51	1235.75	0.871	0.059	36.798	0.0767		2300	0.284	34.287	0.518	1262.86	0.868	0.034	36.304	0.0442			2300	0.291	33.71	0.529	1300	0	0	35.653	0
	2350	0.273	35.448	0.534	1295.44	0.874	0.004	38.065	0.00567512	0.0052		2350	0.276	35.012	0.512	1240.35	0.869	0.054	37.432	0.0702		2350	0.277	34.914	0.52	1270.15	0.867	0.027	36.938	0.0351			2350	0.285	34.354	0.529	1300	0	0	36.287	0
	2400	0.266	36.089	0.533	1293.37	0.873	0.006	38.646	0.00851269	0.0078		2400	0.27	35.628	0.513	1245.95	0.867	0.049	38.066	0.0637		2400	0.27	35.545	0.522	1277.09	0.866	0.021	37.572	0.0273			2400	0.278	34.998	0.529	1300	0	0	36.921	0
	2450	0.259	36.729	0.532	1290.69	0.872	0.009	39.226	0.012769	0.0117		2450	0.263	36.247	0.515	1252.43	0.866	0.044	38.7	0.0572		2450	0.264	36.179	0.524	1283.33	0.865	0.015	38.206	0.0195			2450	0.271	35.642	0.529	1300	0	0	37.555	0
	2500	0.252	37.368	0.531	1287.31	0.871	0.012	39.806	0.0170254	0.0156		2500	0.256	36.869	0.517	1259.58	0.864	0.037	39.334	0.0481		2500	0.257	36.816	0.525	1288.61	0.863	0.01	38.84	0.013			2500	0.264	36.286	0.529	1300	0	0	38.189	0
	2550	0.245	38.005	0.53	1283.17	0.87	0.016	40.386	0.0227005	0.0208		2550	0.25	37.495	0.519	1267.07	0.863	0.03	39.968	0.039		2550	0.25	37.456	0.527	1292.79	0.862	0.007	39.474	0.0091			2550	0.257	36.93	0.529	1300	0	0	38.823	0
	2600	0.238	38.639	0.528	1278.3	0.868	0.02	40.966	0.0283756	0.026		2600	0.243	38.124	0.521	1274.45	0.862	0.024	40.602	0.0312		2600	0.243	38.097	0.528	1295.89	0.861	0.004	40.108	0.0052			2600	0.25	37.574	0.529	1300	0	0	39.457	0
	2650	0.231	39.271	0.526	1272.79	0.867	0.025	41.546	0.0354695	0.0325		2650	0.236	38.757	0.523	1281.3	0.86	0.017	41.236	0.0221		2650	0.236	38.739	0.528	1297.87	0.86	0.002	40.742	0.0026			2650	0.243	38.218	0.529	1300	0	0	40.091	0
	2700	0.224	39.9	0.524	1266.87	0.866	0.031	42.126	0.0439822	0.0403		2700	0.229	39.393	0.525	1287.22	0.859	0.012	41.87	0.0156		2700	0.229	39.382	0.529	1299.04	0.859	0.001	41.376	0.0013			2700	0.236	38.862	0.529	1300	0	0	40.725	0
	2750	0.218	40.526	0.522	1260.8	0.864	0.036	42.706	0.0510761	0.0468		2750	0.222	40.032	0.526	1291.95	0.858	0.007	42.504	0.0091		2750	0.223	40.026	0.529	1299.62	0.858	0	42.01	0			2750	0.23	39.506	0.529	1300	0	0	41.359	0
	2800	0.211	41.149	0.52	1254.95	0.863	0.042	43.287	0.0595888	0.0546		2800	0.216	40.673	0.527	1295.45	0.857	0.004	43.138	0.0052		2800	0.216	40.67	0.529	1300.02	0.857	0	42.645	0			2800	0.223	40.15	0.529	1300	0	0	41.993	0
	2850	0.204	41.77	0.518	1249.66	0.861	0.047	43.867	0.0666827	0.0611		2850	0.209	41.315	0.528	1297.69	0.856	0.002	43.772	0.0026		2850	0.209	41.314	0.529	1300	0	0	43.279	0			2850	0.216	40.793	0.529	1300	0	0	42.627	0
	2900	0.197	42.388	0.516	1245.19	0.86	0.051	44.447	0.0723578	0.0663		2900	0.202	41.958	0.529	1299	0.855	0.001	44.406	0.0013		2900	0.202	41.958	0.529	1300	0	0	43.913	0			2900	0.209	41.437	0.529	1300	0	0	43.261	0
	2950	0.191	43.004	0.514	1241.67	0.858	0.054	45.027	0.0766142	0.0702		2950	0.195	42.602	0.529	1299.63	0.853	0	45.027	0		2950	0.195	42.602	0.529	1300	0	0	44.547	0			2950	0.202	42.081	0.529	1300	0	0	43.895	0
	3000	0.184	43.618	0.513	1239.07	0.857	0.057	45.607	0.0808705	0.0741		3000	0.188	43.245	0.529	1300.01	0.852	0	45.607	0		3000	0.188	43.245	0.529	1300	0	0	45.181	0			3000	0.195	42.725	0.529	1300	0	0	44.529	0
	3050	0.177	44.231	0.512	1237.26	0.855	0.059	46.187	0.0837081	0.0767		3050	0.181	43.889	0.529	1300	0	0	46.188	0		3050	0.181	43.889	0.529	1300	0	0	45.815	0			3050	0.188	43.369	0.529	1300	0	0	45.163	0
	3100	0.171	44.844	0.512	1236.13	0.853	0.06	46.767	0.0851269	0.078		3100	0.174	44.533	0.529	1300	0	0	46.768	0		3100	0.174	44.533	0.529	1300	0	0	46.449	0			3100	0.181	44.013	0.529	1300	0	0	45.797	0
	3150	0.164	45.456	0.511	1235.59	0.852	0.06	47.347	0.0851269	0.078		3150	0.167	45.177	0.529	1300	0	0	47.348	0		3150	0.167	45.177	0.529	1300	0	0	47.083	0			3150	0.174	44.657	0.529	1300	0	0	46.431	0
	3200	0.157	46.068	0.511	1235.64	0.85	0.06	47.927	0.0851269	0.078		3200	0.161	45.821	0.529	1300	0	0	47.928	0		3200	0.161	45.821	0.529	1300	0	0	47.717	0			3200	0.168	45.301	0.529	1300	0	0	47.065	0
	3250	0.151	46.68	0.511	1236.27	0.848	0.06	48.508	0.0851269	0.078		3250	0.154	46.465	0.529	1300	0	0	48.508	0		3250	0.154	46.465	0.529	1300	0	0	48.351	0			3250	0.161	45.945	0.529	1300	0	0	47.699	0
	3300	0.144	47.293	0.511	1237.44	0.847	0.059	49.088	0.0837081	0.0767		3300	0.147	47.109	0.529	1300	0	0	49.088	0		3300	0.147	47.109	0.529	1300	0	0	48.985	0			3300	0.154	46.589	0.529	1300	0	0	48.333	0
	3350	0.135	47.909	0.564	1238.75	0.93	0.058	49.668	0.0822893	0.0754		3350	0.137	47.756	0.584	1300	0	0	49.668	0		3350	0.137	47.756	0.584	1300	0	0	49.619	0			3350	0.144	47.235	0.584	1300	0	0	48.967	0
	3400	0.126	48.525	0.565	1240.73	0.928	0.056	50.248	0.0794517	0.0728		3400	0.128	48.402	0.584	1300	0	0	50.248	0		3400	0.128	48.402	0.584	1300	0	0	50.248	0			3400	0.134	47.882	0.584	1300	0	0	49.601	0
	3450	0.116	49.143	0.565	1243.88	0.926	0.053	50.828	0.0751954	0.0689		3450	0.118	49.049	0.584	1300	0	0	50.828	0		3450	0.118	49.049	0.584	1300	0	0	50.828	0			3450	0.125	48.529	0.584	1300	0	0	50.235	0
	3500	0.107	49.764	0.567	1249.31	0.925	0.048	51.408	0.0681015	0.0624		3500	0.108	49.696	0.584	1300	0	0	51.409	0		3500	0.108	49.696	0.584	1300	0	0	51.408	0			3500	0.115	49.175	0.584	1300	0	0	50.869	0
	3550	0.098	50.387	0.57	1257.73	0.923	0.04	51.988	0.0567512	0.052		3550	0.098	50.342	0.584	1300	0	0	51.989	0		3550	0.098	50.342	0.584	1300	0	0	51.989	0			3550	0.105	49.85	0.584	1410	0	0	51.503	0
	3600	0.088	51.015	0.573	1268.42	0.921	0.03	52.568	0.0425634	0.039		3600	0.089	50.989	0.584	1300	0	0	52.569	0		3600	0.089	50.989	0.584	1300	0	0	52.569	0			3600	0.095	50.552	0.584	1410	0	0	52.137	0
	3650	0.079	51.649	0.577	1279.39	0.919	0.02	53.149	0.0283756	0.026		3650	0.079	51.636	0.584	1300	0	0	53.149	0		3650	0.079	51.636	0.584	1300	0	0	53.149	0			3650	0.084	51.253	0.584	1410	0	0	52.771	0
	3700	0.069	52.288	0.58	1288.76	0.917	0.011	53.729	0.0156066	0.0143		3700	0.069	52.282	0.584	1300	0	0	53.729	0		3700	0.069	52.282	0.584	1300	0	0	53.729	0			3700	0.074	51.954	0.584	1410	0	0	53.405	0
	3750	0.06	52.931	0.582	1295.43	0.915	0.004	54.309	0.00567512	0.0052		3750	0.06	52.929	0.584	1300	0	0	54.309	0		3750	0.06	52.929	0.584	1300	0	0	54.309	0			3750	0.064	52.655	0.584	1410	0	0	54.039	0
	3800	0.043	53.582	0.703	1298.47	1.086	0.002	54.889	0.00239758	0.0026		3800	0.043	53.582	0.704	1300	0	0	54.889	0		3800	0.043	53.582	0.704	1300	0	0	54.889	0			3800	0.046	53.364	0.704	1410	0	0	54.673	0
	3850	0.032	54.23	0.626	1299.79	0.964	0.0007	55.469	0.000839155	0.00091		3850	0.032	54.23	0.626	1300	0	0	55.469	0		3850	0.032	54.23	0.626	1300	0	0	55.469	0			3850	0.035	54.066	0.626	1410	0	0	55.307	0
	3900	0.022	54.878	0.626	1300	0	0.0005	56.049	0.000599396	0.00065		3900	0.022	54.878	0.626	1300	0	0	56.05	0		3900	0.022	54.878	0.626	1300	0	0	56.049	0			3900	0.023	54.769	0.626	1410	0	0	55.941	0
	3950	0.011	55.526	0.626	1300	0	0.0001	56.629	0.000119879	0.00013		3950	0.011	55.526	0.626	1300	0	0	56.63	0		3950	0.011	55.526	0.626	1300	0	0	56.63	0			3950	0.011	55.471	0.626	1410	0	0	56.575	0
	4000	0	56.173	0.626	1300	0	0	56.173	0	0		4000	0	56.173	0.626	1300	0	0	56.173	0		4000	0	56.173	0.626	1300	0	0	56.173	0			4000	0	56.173	0.626	1410	0	0	56.173	0
			A1	0.0283756
			A2	0.0239758		0.528623			1.55185

## Sheet: 有溶解气体
	油水比0.8	饱和																					油水比0.8
悬浮浓度	井深m	环空压耗	环空压力	泥浆流速m/s	平均密度	实际气速	自由气VF	溶解气wc	气体密度			0min		10min		30min			52min				井深m	0min		10min		30min			52min
0.0358293	0	8.395	0	0.609	758.99	97.976	0.485	0.00267	0.68051				0	0		0		0.00267	0.0025365				0		0	0		0		0.32	0.304
0.0357542	50	8.044	0.745	0.576	807.67	36.67	0.461	0.00309	5.0864				0	0		0		0.00309	0.0029355				50		0	0		0		0.29	0.2755
0.0356766	100	7.914	1.281	0.553	851.47	25.678	0.444	0.00351	9.6243				0	0		0		0.00351	0.0033345				100		0	0		0		0.264	0.2508
0.0355966	150	7.836	1.803	0.531	895.22	20.072	0.428	0.00393	14.301				0	0		0		0.00393	0.0037335				150		0	0		0		0.245	0.23275
0.0355135	200	7.781	2.31	0.51	929.01	16.67	0.414	0.00435	19.148				0	0		0		0.00435	0.0041325				200		0	0		0		0.23	0.2185
0.0354273	250	7.74	2.813	0.491	946.54	14.333	0.401	0.00477	24.162				0	0		0		0.00477	0.0045315				250		0	0		0		0.211	0.20045
0.035338	300	7.707	3.31	0.472	955.65	12.641	0.388	0.00519	29.34				0	0		0		0.00519	0.0049305				300		0	0		0		0.193	0.18335
0.0352452	350	7.681	3.805	0.454	962.19	11.355	0.376	0.00561	34.723				0	0		0		0.00561	0.0053295				350		0	0		0		0.181	0.17195
0.0351495	400	7.658	4.298	0.436	970.56	10.342	0.364	0.00603	40.25				0	0		0		0.00603	0.0057285				400		0	0		0		0.163	0.15485
0.0350504	450	7.639	4.792	0.42	977.17	9.521	0.353	0.00645	45.951				0	0		0		0.00645	0.0061275				450		0	0		0		0.148	0.1406
0.0349474	500	7.622	5.285	0.404	981.23	8.844	0.343	0.00687	51.869				0	0		0		0.00687	0.0065265				500		0	0		0		0.137	0.13015
0.0348423	550	7.607	5.779	0.39	986.95	8.276	0.333	0.00729	57.895				0	0		0		0.00729	0.0069255				550		0	0		0		0.121	0.11495
0.0347342	600	7.594	6.275	0.376	993.24	7.791	0.324	0.00771	64.071				0	0		0		0.00771	0.0073245				600		0	0		0		0.106	0.1007
0.0346231	650	7.582	6.772	0.363	998.92	7.374	0.315	0.00813	70.404				0	0		0		0.00813	0.0077235				650		0	0		0		0.09	0.0855
0.0345124	700	7.571	7.271	0.351	1001.86	7.011	0.307	0.00852	76.695				0	0		0		0.00852	0.008094				700		0	0		0		0.079	0.07505
0.0344009	750	7.561	7.768	0.339	995.41	6.695	0.299	0.00891	83.009				0	0		0		0.00891	0.0084645				750		0	0		0		0.068	0.0646
0.0342918	800	7.552	8.257	0.328	967.51	6.419	0.291	0.00929	89.173				0	0		0		0.00929	0.0088255				800		0	0		0		0.055	0.05225
0.0341877	850	7.543	8.732	0.316	953.2	6.18	0.285	0.00967	95.035				0	0		0		0.00967	0.0091865				850		0	0		0		0.044	0.0418
0.0340985	900	7.535	9.207	0.305	961.96	5.968	0.279	0.01005	100.05				0	0		0		0.01005	0.0095475				900		0	0		0		0.033	0.03135
0.0340247	950	7.528	9.685	0.292	970.28	5.776	0.273	0.01043	104.19				0	0		0		0.01043	0.0099085				950		0	0		0		0.0232	0.02204
0.0339716	1000	7.521	10.168	0.279	977.92	5.601	0.268	0.01081	107.16				0	0		0		0.01081					1000		0	0		0		0.0216
0.0339084	1050	7.323	10.691	2.957	652.07	17.791	0.541	0.01119	110.7				0	0		0		0.01119					1050		0	0		0		0.0213
0.0338163	1100	7.13	11.208	2.92	657.85	17.197	0.538	0.01157	115.84				0	0		0		0.01157					1100		0	0		0		0.0211
0.033729	1150	6.947	11.718	2.886	663.22	16.675	0.535	0.01194	120.7				0	0		0		0.01194					1150		0	0		0		0.02095
0.0336427	1200	6.77	12.223	2.853	668.33	16.211	0.532	0.01232	125.49				0	0		0		0.01232					1200		0	0		0		0.0208
0.0335604	1250	6.6	12.724	2.823	672.97	15.797	0.53	0.01269	130.05				0	0		0		0.01269					1250		0	0		0		0.02065
0.0334792	1300	6.436	13.221	2.793	677.29	15.423	0.528	0.01307	134.55				0	0		0		0.01307					1300		0	0		0		0.02051
0.0334028	1350	6.277	13.714	2.765	681.33	15.085	0.526	0.01344	138.76				0	0		0		0.01344					1350		0	0		0		0.02037
0.0333293	1400	6.122	14.205	2.738	685.1	14.778	0.524	0.01382	142.81				0	0		0		0.01382					1400		0	0		0		0.02024
0.0332583	1450	5.972	14.693	2.712	688.63	14.498	0.523	0.0142	146.72				0	0		0		0.0142					1450		0	0		0		0.02011
0.0331899	1500	5.826	15.178	2.687	691.94	14.241	0.521	0.01457	150.47				0	0		0		0.01457					1500		0	0		0		0.01999
0.0331231	1550	5.683	15.662	2.663	695.05	14.004	0.52	0.01495	154.13				0	0		0		0.01495					1550		0	0		0		0.01987
0.0330589	1600	5.543	16.144	2.64	697.96	13.785	0.518	0.01533	157.64				0	0		0.00888	16.3784	0.01533					1600		0	0		0.00288	5.31192	0.01976
0.032997	1650	5.407	16.624	2.618	700.71	13.583	0.517	0.0157	161.02				0	0		0.0157	28.9573	0.0157					1650		0	0		0.0107	19.7352	0.01966
0.0329373	1700	5.273	17.102	2.597	703.29	13.395	0.516	0.01608	164.27				0	0		0.01608	29.6582	0.01608					1700		0	0		0.01508	27.8138	0.01956
0.0328799	1750	5.141	17.579	2.576	705.73	13.219	0.515	0.01646	167.4				0	0		0.01646	30.3591	0.01646					1750		0	0		0.01946	35.8923	0.01946
0.0328262	1800	5.012	18.055	2.556	708.04	13.055	0.514	0.01684	170.31				0	0		0.01684	31.06	0					1800		0	0		0.01958	36.1137	0
0.0327748	1850	4.885	18.53	2.537	710.21	12.902	0.513	0.01722	173.11				0	0		0.01722	31.7608	0					1850		0	0		0.01949	35.9477	0
0.0327251	1900	4.761	19.003	2.518	712.28	12.758	0.512	0.0176	175.8				0	0		0.0176	32.4617	0					1900		0	0		0.0194	35.7817	0
0.0326772	1950	4.638	19.476	2.5	714.23	12.622	0.511	0.01798	178.39				0	0		0.01798	33.1626	0					1950		0	0		0.0193	35.5972	0
0.0326311	2000	4.517	19.948	2.483	716.09	12.494	0.51	0.01836	180.88				0	0		0.01836	33.8635	0					2000		0	0		0.01921	35.4312	0
0.0325867	2050	4.397	20.418	2.466	717.85	12.373	0.51	0.01874	183.28				0	0		0.01874	34.5643	0					2050		0	0		0.01908	35.1914	0
0.032542	2100	4.28	20.888	2.449	719.52	12.259	0.509	0.01912	185.69				0	0		0.01912	35.2652	0					2100		0	0		0.01894	34.9332	0
0.0324987	2150	4.164	21.358	2.434	721.12	12.15	0.508	0.0195	188.02				0	0		0.0195	35.9661	0					2150		0	0		0.0188	34.675	0
0.032457	2200	4.049	21.826	2.418	722.64	12.047	0.508	0.01989	190.26				0	0		0.01989	36.6854	0					2200		0	0		0.01867	34.4352	0
0.0324183	2250	3.936	22.294	2.403	724.09	11.949	0.507	0.02027	192.33				0	0		0.02027	37.3863	0					2250		0	0		0.01853	34.177	0
0.0323794	2300	3.824	22.761	2.389	725.47	11.856	0.507	0.02065	194.43				0	0		0.02065	38.0872	0					2300		0	0		0.01839	33.9188	0
0.0323398	2350	3.713	23.228	2.374	726.8	11.767	0.506	0.02104	196.55				0	0		0.02104	38.8065	0					2350		0	0		0.01826	33.679	0
0.0323031	2400	3.604	23.694	2.361	728.06	11.682	0.506	0.02142	198.52				0	0		0.02142	39.5074	0					2400		0	0		0.01814	33.4577	0
0.0322692	2450	3.495	24.159	2.347	729.28	11.6	0.505	0.02181	200.33				0	0		0.02181	40.2267	0					2450		0	0		0.01802	33.2364	0
0.0322346	2500	3.388	24.624	2.334	730.44	11.522	0.505	0.0222	202.18				0	0		0.0222	40.946	0					2500		0	0		0.01791	33.0335	0
0.0321996	2550	3.282	25.088	2.322	731.55	11.448	0.504	0.02259	204.05				0	0		0.02259	41.6653	0					2550		0	0		0.0178	32.8306	0
0.0321655	2600	3.177	25.552	2.309	732.62	11.376	0.504	0.02297	205.88				0	0		0.02297	42.3662	0					2600		0	0		0.0177	32.6461	0
0.0321323	2650	3.072	26.016	2.297	733.65	11.307	0.504	0.02336	207.65				0	0		0.02336	43.0855	0					2650		0	0		0.0176	32.4617	0
0.0321	2700	2.969	26.479	2.286	734.64	11.241	0.503	0.02375	209.36				0	0		0.02375	43.8049	0					2700		0	0		0.0175	32.2773	0
0.0320687	2750	2.867	26.941	2.274	735.6	11.177	0.503	0.02414	211.04				0	0.01367	25.2132	0	0	0					2750		0	0		0	0	0
0.032038	2800	2.765	27.404	2.263	736.52	11.116	0.503	0.02454	212.66				0	0.01367	25.2132	0	0	0					2800		0	0.00015	0.276662	0	0	0
0.0320083	2850	2.664	27.865	2.252	737.41	11.057	0.502	0.02493	214.25				0	0.01367	25.2132	0		0					2850		0	0.00015	0.276662	0		0
0.0319776	2900	2.564	28.327	2.242	738.28	11	0.502	0.02532	215.87				0	0.01367	25.2132	0		0					2900		0	0.00015	0.276662	0		0
0.0319493	2950	2.465	28.788	2.232	739.12	10.945	0.502	0.02574	217.37				0	0.01367	25.2132	0		0					2950		0	0.00015	0.276662	0		0
0.0319203	3000	2.367	29.249	2.222	739.93	10.892	0.501	0.02615	218.91				0	0.01367	25.2132	0		0					3000		0	0.00015	0.276662	0		0
0.0318887	3050	2.269	29.709	2.213	740.73	10.84	0.501	0.02657	220.58	0.01367	25.2132	25.2132	0.01367	0.01367	25.2132	0		0					3050	0	0	0.00015	0.276662	0		0
0.0318579	3100	2.172	30.169	2.204	741.5	10.791	0.501	0.02698	222.21	0.01367	25.2132	25.2132	0.01367	0.0243494	44.9105	0		0					3100	0	0	0.00015	0.276662	0		0
0.0318279	3150	2.076	30.629	2.195	742.26	10.743	0.501	0.0274	223.79	0.01367	25.2132	25.2132	0.01367	0.0247285	45.6096	0		0					3150	0	0	0.00015	0.276662	0		0
0.0317984	3200	1.98	31.089	2.187	743.01	10.697	0.5	0.02782	225.32	0.01367	25.2132	25.2132	0.01367	0.0251075	46.3087	0		0					3200	20.2886	0.011	0.00015	0.276662	0		0
0.0317696	3250	1.885	31.548	2.179	743.74	10.652	0.5	0.02824	226.78	0.01367	25.2132	25.2132	0.01367	0.0254866	47.0079	0		0					3250	20.0857	0.01089	0.00015	0.276662	0		0
0.0317398	3300	1.79	32.007	2.171	744.51	10.608	0.5	0.02866	228.18	0.01367	25.2132	25.2132	0.01367	0.0258657	47.707	0		0					3300	19.892	0.010785	0.00015	0.276662	0		0
0.0317108	3350	1.668	32.486	2.468	727.18	11.287	0.516	0.02908	229.43	0.01367	25.2132	25.2132	0.01367	0.0262447	48.4061	0		0					3350	19.7814	0.010725	0.00015	0.276662	0		0
0.0316793	3400	1.545	32.965	2.461	728.01	11.239	0.516	0.02956	230.82	0.01367	25.2132	43.2515	0.02345	0.0266779	49.2051	0		0					3400	19.6522	0.010655	0.00015	0.276662	0		0
0.0316483	3450	1.424	33.444	2.453	728.82	11.193	0.515	0.03	232.18	0.01367	25.2132	49.0061	0.02657	0.027075	49.9375	0		0					3450	19.4586	0.01055	0.00015	0.276662	0		0
0.0316171	3500	1.303	33.922	2.447	729.62	11.149	0.515	0.03044	233.55	0.01367	25.2132	49.7623	0.02698	0.0274721	50.67	0		0					3500	19.2465	0.010435	0.00015	0.276662	0		0
0.0315859	3550	1.183	34.4	2.44	730.41	11.105	0.515	0.03089	234.93	0.01367	25.2132	50.537	0.0274	0.0278782	51.419	0		0					3550	19.1081	0.01036	0.00015	0.276662	0		0
0.0315537	3600	1.063	34.877	2.434	731.19	11.063	0.514	0.03131	236.38	0.01367	25.2132	51.3116	0.02782	0.0282573	52.1181	0		0					3600	18.9514	0.010275	0.00015	0.276662	0		0
0.03152	3650	0.944	35.355	2.428	731.96	11.023	0.514	0.03173	237.93	0.01367	25.2132	52.0863	0.02824	0.0286363	52.8173	0		0					3650	18.8315	0.01021	0.00015	0.276662	0		0
0.031486	3700	0.826	35.832	2.422	732.71	10.983	0.514	0.03215	239.49	0.01367	25.2132	52.8609	0.02866	0.0290154	53.5164	0		0					3700	18.7208	0.01015	0.00015	0.276662	0		0
0.0314526	3750	0.708	36.309	2.416	733.49	10.945	0.513	0.03257	241.08	0.01367	25.2132	53.6356	0.02908	0		0		0					3750	18.6286	0.0101	0		0		0
0.031419	3800	0.524	36.846	2.988	720.2	12.825	0.526	0.03299	242.7	0.01367	21.3037	46.0672	0.02956	0		0		0					3800	15.709	0.01008	0		0		0
0.0313849	3850	0.391	37.341	2.565	738.36	11.711	0.51	0.03341	244.41	0.01367	21.3037	46.7529	0.03	0		0		0					3850	15.6856	0.010065	0		0		0
0.0313512	3900	0.259	37.835	2.56	739.11	11.671	0.509	0.03383	246.19	0.01367	21.3037	47.4386	0.03044	0		0		0					3900	15.67	0.010055	0		0		0
0.0313184	3950	0.128	38.328	2.555	739.84	11.631	0.509	0.03425	247.97	0.01367	21.3037	48.1399	0.03089	0		0		0					3950	15.6622	0.01005	0		0		0
0.0312816	4000	0.003	38.802	2.549	740.49	11.595	0.509	0.03467	249.97	0.01367	21.3037	48.7945	0.03131	0		0		0					4000	15.5843	0.01	0		0		0
																									0.0055
											484.716	816.137			816.125		816.025								0.005445
											816														0.0053925
																									0.0053625
						v1	v2		10min			30min													0.0053275
				A1	0.0283756	1.05725	0.528623		201	105.725	2732.83	951.521	1600	0											0.005275
				A2	0.0239758	1.25126	0.62563		399.597	250	3644.28	951.521	2692.75	1740.48											0.0052175
				A3	0.00801185		1.87223							1135.02	534.123										0.00518
									505.322	355.725															0.0051375
														1669.15											0.005105
																									0.005075
																									0.00505
																									0.00504
			3070	643.181																					0.0050325
			2750	199.799																					0.0050275
																									0.005025
			14.0497	842.979																					0.005
															0

## Sheet: 同时存在溶解和悬浮
	油水比0.8	饱和										0min			10min			30min					52min				油水比0.8
悬浮浓度	井深m	环空压耗	环空压力	泥浆流速m/s	平均密度	实际气速	自由气VF	溶解气wc	气体密度			溶解质量	悬浮	溶解度													井深m	0min		10min		30min			52min
0.0358293	0	8.395	0	0.609	758.99	97.976	0.485	0.00267	0.68051					0	0			0			0	0	0				0		0	0		0		0.32	0.304
0.0357542	50	8.044	0.745	0.576	807.67	36.67	0.461	0.00309	5.0864					0	0			0			0	0	0				50		0	0		0		0.29	0.2755
0.0356766	100	7.914	1.281	0.553	851.47	25.678	0.444	0.00351	9.6243					0	0			0			0	0	0				100		0	0		0		0.264	0.2508
0.0355966	150	7.836	1.803	0.531	895.22	20.072	0.428	0.00393	14.301					0	0			0			0	0	0				150		0	0		0		0.245	0.23275
0.0355135	200	7.781	2.31	0.51	929.01	16.67	0.414	0.00435	19.148					0	0			0			0	0.0003	0				200		0	0		0		0.23	0.2185
0.0354273	250	7.74	2.813	0.491	946.54	14.333	0.401	0.00477	24.162					0	0			0			0.00477	0.000857979	0.0045315				250		0	0		0		0.211	0.20045
0.035338	300	7.707	3.31	0.472	955.65	12.641	0.388	0.00519	29.34					0	0			0			0.00519	0.000996954	0.0049305				300		0	0		0		0.193	0.18335
0.0352452	350	7.681	3.805	0.454	962.19	11.355	0.376	0.00561	34.723					0	0			0			0.00561	0.00101908	0.0053295				350		0	0		0		0.181	0.17195
0.0351495	400	7.658	4.298	0.436	970.56	10.342	0.364	0.00603	40.25					0	0			0			0.00603	0.00106864	0.0057285				400		0	0		0		0.163	0.15485
0.0350504	450	7.639	4.792	0.42	977.17	9.521	0.353	0.00645	45.951					0	0			0			0.00645	0.00116821	0.0061275				450		0	0		0		0.148	0.1406
0.0349474	500	7.622	5.285	0.404	981.23	8.844	0.343	0.00687	51.869					0	0			0			0.00687	0.0013678	0.0065265				500		0	0		0		0.137	0.13015
0.0348423	550	7.607	5.779	0.39	986.95	8.276	0.333	0.00729	57.895					0	0			0			0.00729	0.00173958	0.0069255				550		0	0		0		0.121	0.11495
0.0347342	600	7.594	6.275	0.376	993.24	7.791	0.324	0.00771	64.071					0	0			0			0.00771	0.00236701	0.0073245				600		0	0		0		0.106	0.1007
0.0346231	650	7.582	6.772	0.363	998.92	7.374	0.315	0.00813	70.404					0	0			0			0.00813	0.00544665	0.0077235				650		0	0		0		0.09	0.0855
0.0345124	700	7.571	7.271	0.351	1001.86	7.011	0.307	0.00852	76.695					0	0			0			0.00852	0.0106292	0.008094				700		0	0		0		0.079	0.07505
0.0344009	750	7.561	7.768	0.339	995.41	6.695	0.299	0.00891						0	0			0			0.00891	0.016595	0.0084645				750		0	0		0		0.068	0.0646
0.0342918	800	7.552	8.257	0.328	967.51	6.419	0.291	0.00929	89.173					0	0			0			0.00929	0.0229562	0.0088255				800		0	0		0		0.055	0.05225
0.0341877	850	7.543	8.732	0.316	953.2	6.18	0.285	0.00967	95.035					0	0			0			0.00967	0.0285294	0.0091865				850		0	0		0		0.044	0.0418
0.0340985	900	7.535	9.207	0.305	961.96	5.968	0.279	0.01005	100.05					0	0			0			0.01005	0.030997	0.0095475				900		0	0		0		0.033	0.03135
0.0340247	950	7.528	9.685	0.292	970.28	5.776	0.273	0.01043	104.19					0	0			0			0.01043	0.0329373	0.0099085				950		0	0		0		0.0232	0.02204
0.0339716	1000	7.521	10.168	0.279	977.92	5.601	0.268	0.01081	107.16					0	0			0			0.01081	0.0328799					1000		0	0		0		0.0216
0.0339084	1050	7.323	10.691	2.957	652.07	17.791	0.541	0.01119	110.7					0	0			0			0.01119	0.0328262					1050		0	0		0		0.0213
0.0338163	1100	7.13	11.208	2.92	657.85	17.197	0.538	0.01157	115.84					0	0			0			0.01157	0.0327748					1100		0	0		0		0.0211
0.033729	1150	6.947	11.718	2.886	663.22	16.675	0.535	0.01194	120.7					0	0			0			0.01194	0.0327251					1150		0	0		0		0.02095
0.0336427	1200	6.77	12.223	2.853	668.33	16.211	0.532	0.01232	125.49					0	0			0			0.01232	0.0326772					1200		0	0		0		0.0208
0.0335604	1250	6.6	12.724	2.823	672.97	15.797	0.53	0.01269	130.05					0	0			0			0.01269	0.0326311					1250		0	0		0		0.02065
0.0334792	1300	6.436	13.221	2.793	677.29	15.423	0.528	0.01307	134.55					0	0			0			0.01307	0.0325867					1300		0	0		0		0.02051
0.0334028	1350	6.277	13.714	2.765	681.33	15.085	0.526	0.01344	138.76					0	0			0			0.01344	0.032542					1350		0	0		0		0.02037
0.0333293	1400	6.122	14.205	2.738	685.1	14.778	0.524	0.01382	142.81					0	0			0			0.01382	0.0324987					1400		0	0		0		0.02024
0.0332583	1450	5.972	14.693	2.712	688.63	14.498	0.523	0.0142	146.72					0	0			0			0.0142	0.032457					1450		0	0		0		0.02011
0.0331899	1500	5.826	15.178	2.687	691.94	14.241	0.521	0.01457	150.47					0	0			0			0.01457	0.0324183					1500		0	0		0		0.01999
0.0331231	1550	5.683	15.662	2.663	695.05	14.004	0.52	0.01495	154.13					0	0			0			0.01495	0.0323794					1550		0	0		0		0.01987
0.0330589	1600	5.543	16.144	2.64	697.96	13.785	0.518	0.01533	157.64					0	0			0	0	0	0.01533	0.0323398					1600		0	0		0.00288	5.31192	0.01976
0.032997	1650	5.407	16.624	2.618	700.71	13.583	0.517	0.0157	161.02					0	0			0	0	0	0.0157	0.0323031					1650		0	0		0.0107	19.7352	0.01966
0.0329373	1700	5.273	17.102	2.597	703.29	13.395	0.516	0.01608	164.27					0	0			0.01608	0.03177	29.6582	0.01608	0.0322692					1700		0	0		0.01508	27.8138	0.01956
0.0328799	1750	5.141	17.579	2.576	705.73	13.219	0.515	0.01646	167.4					0	0			0.01646	0.0317318	30.3591	0.01646	0.0322346					1750		0	0		0.01946	35.8923	0.01946
0.0328262	1800	5.012	18.055	2.556	708.04	13.055	0.514	0.01684	170.31					0	0			0.01684	0.0316931	31.06	0	0					1800		0	0		0.01958	36.1137	0
0.0327748	1850	4.885	18.53	2.537	710.21	12.902	0.513	0.01722	173.11					0	0			0.01722	0.031657	31.7608	0						1850		0	0		0.01949	35.9477	0
0.0327251	1900	4.761	19.003	2.518	712.28	12.758	0.512	0.0176	175.8					0	0			0.0176	0.0316239	32.4617	0						1900		0	0		0.0194	35.7817	0
0.0326772	1950	4.638	19.476	2.5	714.23	12.622	0.511	0.01798	178.39					0	0			0.01798	0.0315899	33.1626	0						1950		0	0		0.0193	35.5972	0
0.0326311	2000	4.517	19.948	2.483	716.09	12.494	0.51	0.01836	180.88					0	0			0.01836	0.0315556	33.8635	0						2000		0	0		0.01921	35.4312	0
0.0325867	2050	4.397	20.418	2.466	717.85	12.373	0.51	0.01874	183.28					0	0			0.01874	0.0315222	34.5643	0						2050		0	0		0.01908	35.1914	0
0.032542	2100	4.28	20.888	2.449	719.52	12.259	0.509	0.01912	185.69					0	0			0.01912	0.0314897	35.2652	0						2100		0	0		0.01894	34.9332	0
0.0324987	2150	4.164	21.358	2.434	721.12	12.15	0.508	0.0195	188.02					0	0			0.0195	0.031458	35.9661	0						2150		0	0		0.0188	34.675	0
0.032457	2200	4.049	21.826	2.418	722.64	12.047	0.508	0.01989	190.26					0	0			0.01989	0.0314273	36.6854	0						2200		0	0		0.01867	34.4352	0
0.0324183	2250	3.936	22.294	2.403	724.09	11.949	0.507	0.02027	192.33					0	0			0.02027	0.0313973	37.3863	0						2250		0	0		0.01853	34.177	0
0.0323794	2300	3.824	22.761	2.389	725.47	11.856	0.507	0.02065	194.43					0	0			0.02065	0.0313681	38.0872	0						2300		0	0		0.01839	33.9188	0
0.0323398	2350	3.713	23.228	2.374	726.8	11.767	0.506	0.02104	196.55					0	0			0.02104	0.031338	38.8065	0						2350		0	0		0.01826	33.679	0
0.0323031	2400	3.604	23.694	2.361	728.06	11.682	0.506	0.02142	198.52					0	0			0.02142	0.0313103	39.5074	0						2400		0	0		0.01814	33.4577	0
0.0322692	2450	3.495	24.159	2.347	729.28	11.6	0.505	0.02181	200.33					0	0			0.02181	0.0312819	40.2267	0						2450		0	0		0.01802	33.2364	0
0.0322346	2500	3.388	24.624	2.334	730.44	11.522	0.505	0.0222	202.18					0	0			0.0222	0.031251	40.946	0						2500		0	0		0.01791	33.0335	0
0.0321996	2550	3.282	25.088	2.322	731.55	11.448	0.504	0.02259	204.05					0	0			0.02259	0.0312208	41.6653	0						2550		0	0		0.0178	32.8306	0
0.0321655	2600	3.177	25.552	2.309	732.62	11.376	0.504	0.02297	205.88					0	0			0.02297	0.0311391	42.3662	0						2600		0	0		0.0177	32.6461	0
0.0321323	2650	3.072	26.016	2.297	733.65	11.307	0.504	0.02336	207.65					0	0			0.02336	0.0310162	43.0855	0						2650		0	0		0.0176	32.4617	0
0.0321	2700	2.969	26.479	2.286	734.64	11.241	0.503	0.02375	209.36					0	0			0.02375	0.0309134	43.8049	0						2700		0	0		0.0175	32.2773	0
0.0320687	2750	2.867	26.941	2.274	735.6	11.177	0.503	0.02414	211.04					0	0.01367	0	25.2132	0	0	0	0						2750		0	0		0	0	0
0.032038	2800	2.765	27.404	2.263	736.52	11.116	0.503	0.02454	212.66					0	0.01367	0	25.2132	0	0	0	0						2800		0	0.00015	0.276662	0	0	0
0.0320083	2850	2.664	27.865	2.252	737.41	11.057	0.502	0.02493	214.25					0	0.01367	0	25.2132	0	0		0						2850		0	0.00015	0.276662	0		0
0.0319776	2900	2.564	28.327	2.242	738.28	11	0.502	0.02532	215.87					0	0.01367	0	25.2132	0	0		0						2900		0	0.00015	0.276662	0		0
0.0319493	2950	2.465	28.788	2.232	739.12	10.945	0.502	0.02574	217.37					0	0.01367	0	25.2132	0	0		0						2950		0	0.00015	0.276662	0		0
0.0319203	3000	2.367	29.249	2.222	739.93	10.892	0.501	0.02615	218.91					0	0.01367	0	25.2132	0	0		0						3000		0	0.00015	0.276662	0		0
0.0318887	3050	2.269	29.709	2.213	740.73	10.84	0.501	0.02657	220.58	0.01367	25.2132	25.2132	0	0.01367	0.01367	0	25.2132	0	0		0						3050	0	0	0.00015	0.276662	0		0
0.0318579	3100	2.172	30.169	2.204	741.5	10.791	0.501	0.02698	222.21	0.01367	25.2132	25.2132	0	0.01367	0.0245929	0	45.3596	0	0		0						3100	0	0	0.00015	0.276662	0		0
0.0318279	3150	2.076	30.629	2.195	742.26	10.743	0.501	0.0274	223.79	0.01367	25.2132	25.2132	0	0.01367	0.0249758	0	46.0657	0	0		0						3150	0	0	0.00015	0.276662	0		0
0.0317984	3200	1.98	31.089	2.187	743.01	10.697	0.5	0.02782	225.32	0.01367	25.2132	25.2132	0	0.01367	0.0253586	0	46.7718	0	0		0						3200	20.2886	0.011	0.00015	0.276662	0		0
0.0317696	3250	1.885	31.548	2.179	743.74	10.652	0.5	0.02824	226.78	0.01367	25.2132	25.2132	0	0.01367	0.0257415	0	47.478	0	0		0						3250	20.0857	0.01089	0.00015	0.276662	0		0
0.0317398	3300	1.79	32.007	2.171	744.51	10.608	0.5	0.02866	228.18	0.01367	25.2132	25.2132	0	0.01367	0.0261243	0	48.1841	0	0		0						3300	19.892	0.010785	0.00015	0.276662	0		0
0.0317108	3350	1.668	32.486	2.468	727.18	11.287	0.516	0.02908	229.43	0.01367	25.2132	25.2132	0	0.01367	0.0265071	0	48.8902	0	0		0						3350	19.7814	0.010725	0.00015	0.276662	0		0
0.0316793	3400	1.545	32.965	2.461	728.01	11.239	0.516	0.02956	230.82	0.01367	25.2132	25.2132	0	0.01367	0.0269447	0	49.6972	0	0		0						3400	19.6522	0.010655	0.00015	0.276662	0		0
0.0316483	3450	1.424	33.444	2.453	728.82	11.193	0.515	0.03	232.18	0.01367	25.2132	25.2132	0	0.01367	0.0273457	0	50.4369	0	0		0						3450	19.4586	0.01055	0.00015	0.276662	0		0
0.0316171	3500	1.303	33.922	2.447	729.62	11.149	0.515	0.03044	233.55	0.01367	25.2132	25.2132	0	0.01367	0.0277468	0	51.1767	0	0		0						3500	19.2465	0.010435	0.00015	0.276662	0		0
0.0315859	3550	1.183	34.4	2.44	730.41	11.105	0.515	0.03089	234.93	0.01367	25.2132	25.2132	0	0.01367	0.028157	0	51.9332	0	0		0						3550	19.1081	0.01036	0.00015	0.276662	0		0
0.0315537	3600	1.063	34.877	2.434	731.19	11.063	0.514	0.03131	236.38	0.01367	25.2132	51.3116	0	0.02782	0.0285398	0	52.6393	0	0		0						3600	18.9514	0.010275	0.00015	0.276662	0		0
0.03152	3650	0.944	35.355	2.428	731.96	11.023	0.514	0.03173	237.93	0.01367	25.2132	52.0863	0.03152	0.02824	0.0289227	0	53.3454	0	0		0						3650	18.8315	0.01021	0.00015	0.276662	0		0
0.031486	3700	0.826	35.832	2.422	732.71	10.983	0.514	0.03215	239.49	0.01367	25.2132	52.8609	0.031486	0.02866	0.0293055	0	54.0516	0	0		0						3700	18.7208	0.01015	0.00015	0.276662	0		0
0.0314526	3750	0.708	36.309	2.416	733.49	10.945	0.513	0.03257	241.08	0.01367	25.2132	53.6356	0.0314526	0.02908	0			0			0						3750	18.6286	0.0101	0		0		0
0.031419	3800	0.524	36.846	2.988	720.2	12.825	0.526	0.03299	242.7	0.01367	21.3037	46.0672	0.031419	0.02956	0			0			0						3800	15.709	0.01008	0		0		0
0.0313849	3850	0.391	37.341	2.565	738.36	11.711	0.51	0.03341	244.41	0.01367	21.3037	46.7529	0.0313849	0.03	0			0			0						3850	15.6856	0.010065	0		0		0
0.0313512	3900	0.259	37.835	2.56	739.11	11.671	0.509	0.03383	246.19	0.01367	21.3037	47.4386	0.0313512	0.03044	0			0			0						3900	15.67	0.010055	0		0		0
0.0313184	3950	0.128	38.328	2.555	739.84	11.631	0.509	0.03425	247.97	0.01367	21.3037	48.1399	0.0313184	0.03089	0			0			0						3950	15.6622	0.01005	0		0		0
0.0312816	4000	0.003	38.802	2.549	740.49	11.595	0.509	0.03467	249.97	0.01367	21.3037	48.7945	0.0312816	0.03131	0			0			0						4000	15.5843	0.01	0		0		0
0.0312529
0.0312201																0.0248389
0.0311873																0.0252255													0.0055
0.0311546											484.716	724.432				0.0256122	822.522			770.689									0.005445
0.0311218											816					0.0259989													0.0053925
0.031089																0.0263855													0.0053625
0.0310562						v1	v2		10min			30min				0.0267722			0										0.0053275
0.0310235				A1	0.0283756	1.05725	0.528623		201	105.725	2732.83	951.521		1600	0	0.0272141			0										0.005275
0.0309907				A2	0.0239758	1.25126	0.62563		399.597	250	3644.28	951.521		2692.75	1740.48	0.0276192			0.0311346										0.0052175
0.0309579				A3	0.00801185		1.87223								1135.02	0.0280243	534.123		0.0310972										0.00518
									505.322	355.725						0.0284386			0.0310592										0.0051375
															1669.15	0.0288252			0.0310239										0.005105
																0.0292119			0.0309914										0.005075
																0.0295986			0.0309581										0.00505
																			0.0309245										0.00504
			3070	643.181															0.0308918										0.0050325
			2750	199.799															0.0308599										0.0050275
																			0.0308289										0.005025
			14.0497	842.979															0.0307987										0.005
																			0.0307693
																			0.0307408
																			0.0307113
																			0.0306841
																			0.0306562
																			0.0306259
																			0.0305964
																			0.0305163
																			0.0303959
																			0.0302951
