# Supplementary material for: A drilling wellbore pressure calculation model considering the effect of gas dissolution and suspension
Source: Frontiers journal article supplement (doi:10.3389/feart.2022.993876), 2022-09-27
Supplement: Data_Sheet_6.xlsx [file Data_Sheet_6.xlsx]

## Sheet: 不考虑气体溶解悬浮
	4.5min	1m3														8min	2m3										11.5min	3m3										14.5min	4m3										17min
密度	井深m	环空压耗	环空压力	泥浆流速m/s	平均密度	实际气速	自由气VF	溶解气wc	气体密度	体积误差1	悬浮气体体积	运移气质量	悬浮气质量	总气体积分数		井深m	环空压耗	环空压力	泥浆流速m/s	平均密度	实际气速	自由气VF	溶解气wc	气体密度	气体体积	气体质量	井深m	环空压耗	环空压力	泥浆流速m/s	平均密度	实际气速	自由气VF	溶解气wc	气体密度			井深m	环空压耗	环空压力	泥浆流速m/s	平均密度	实际气速	自由气VF	溶解气wc	气体密度			井深m
	0	0.509	0	0.173	1300	0	0	0	0.68051							0	0.547	0	0.182	1300	0	0	0	0.68051			0	0.555	0	0.185	1300	0	0	0	0.68051			0	0.564	0	0.189	1300	0	0	0	0.68051			0
	50	0.509	0.637	0.173	1300	0	0	0	5.0864							50	0.547	0.637	0.182	1300	0	0	0	5.0864			50	0.555	0.637	0.185	1300	0	0	0	5.0864			50	0.563	0.637	0.189	1300	0	0	0	5.0864			50
	100	0.509	1.274	0.173	1300	0	0	0	9.6243							100	0.547	1.274	0.182	1300	0	0	0	9.6243			100	0.555	1.274	0.185	1300	0	0	0	9.6243			100	0.563	1.274	0.189	1300	0	0	0	9.6243			100
	150	0.509	1.912	0.173	1300	0	0	0	14.301							150	0.547	1.912	0.182	1300	0	0	0	14.301			150	0.555	1.912	0.185	1300	0	0	0	14.301			150	0.563	1.912	0.189	1300	0	0	0	14.301			150
	200	0.509	2.549	0.173	1300	0	0	0	19.148							200	0.547	2.549	0.182	1300	0	0	0	19.148			200	0.555	2.549	0.185	1300	0	0	0	19.148			200	0.563	2.549	0.189	1300	0	0	0	19.148			200
	250	0.508	3.186	0.173	1300	0	0	0	24.162							250	0.547	3.186	0.182	1300	0	0	0	24.162			250	0.555	3.186	0.185	1300	0	0	0	24.162			250	0.563	3.186	0.189	1300	0	0	0	24.162			250
	300	0.508	3.823	0.173	1300	0	0	0	29.34							300	0.546	3.823	0.182	1300	0	0	0	29.34			300	0.554	3.823	0.185	1300	0	0	0	29.34			300	0.563	3.823	0.189	1300	0	0	0	29.34			300
	350	0.508	4.46	0.173	1300	0	0	0	34.714							350	0.546	4.46	0.182	1300	0	0	0	34.714			350	0.554	4.46	0.185	1300	0	0	0	34.714			350	0.562	4.46	0.189	1300	0	0	0	34.723			350
	400	0.508	5.097	0.173	1300	0	0	0	40.241							400	0.546	5.097	0.182	1300	0	0	0	40.25			400	0.554	5.097	0.185	1300	0	0	0	40.25			400	0.562	5.097	0.189	1300	0	0	0	40.25			400
	450	0.508	5.734	0.173	1300	0	0	0	45.951							450	0.546	5.735	0.182	1300	0	0	0	45.951			450	0.554	5.735	0.185	1300	0	0	0	45.951			450	0.562	5.735	0.189	1300	0	0	0	45.951			450
	500	0.508	6.372	0.173	1300	0	0	0	51.869							500	0.546	6.372	0.182	1300	0	0	0	51.869			500	0.554	6.372	0.185	1300	0	0	0	51.869			500	0.562	6.372	0.189	1300	0	0	0	51.869			500
	550	0.507	7.009	0.173	1300	0	0	0	57.895							550	0.546	7.009	0.182	1300	0	0	0	57.895			550	0.554	7.009	0.185	1300	0	0	0	57.895			550	0.562	7.009	0.189	1300	0	0	0	57.895			550
	600	0.507	7.646	0.173	1300	0	0	0	64.071							600	0.545	7.646	0.182	1300	0	0	0	64.071			600	0.553	7.646	0.185	1300	0	0	0	64.071			600	0.562	7.646	0.189	1300	0	0	0	64.071			600
	650	0.507	8.283	0.173	1300	0	0	0	70.404							650	0.545	8.283	0.182	1300	0	0	0	70.404			650	0.553	8.283	0.185	1300	0	0	0	70.404			650	0.561	8.283	0.189	1300	0	0	0	70.404			650
	700	0.507	8.92	0.173	1300	0	0	0	76.695							700	0.545	8.92	0.182	1300	0	0	0	76.695			700	0.553	8.92	0.185	1300	0	0	0	76.695			700	0.561	8.92	0.189	1300	0	0	0	76.695			700
	750	0.507	9.557	0.173	1300	0	0	0	83.009							750	0.545	9.557	0.182	1300	0	0	0	83.009			750	0.553	9.558	0.185	1300	0	0	0	83.009			750	0.561	9.558	0.189	1300	0	0	0	83.009			750
	800	0.507	10.194	0.173	1300	0	0	0	89.173							800	0.545	10.195	0.182	1300	0	0	0	89.173			800	0.553	10.195	0.185	1300	0	0	0	89.173			800	0.561	10.195	0.189	1300	0	0	0	89.173			800
	850	0.507	10.832	0.173	1300	0	0	0	95.035							850	0.545	10.832	0.182	1300	0	0	0	95.035			850	0.553	10.832	0.185	1300	0	0	0	95.035			850	0.561	10.832	0.189	1300	0	0	0	95.035			850
	900	0.506	11.469	0.173	1300	0	0	0	100.05							900	0.545	11.469	0.182	1300	0	0	0	100.05			900	0.552	11.469	0.185	1300	0	0	0	100.05			900	0.561	11.469	0.189	1300	0	0	0	100.05			900
	950	0.506	12.106	0.173	1300	0	0	0	104.19							950	0.544	12.106	0.182	1300	0	0	0	104.19			950	0.552	12.106	0.185	1300	0	0	0	104.19			950	0.56	12.106	0.189	1300	0	0	0	104.19			950
	1000	0.506	12.743	0.173	1300	0	0	0	107.16							1000	0.544	12.743	0.182	1300	0	0	0	107.16			1000	0.552	12.743	0.185	1300	0	0	0	107.16			1000	0.56	12.743	0.189	1300	0	0	0	107.16			1000
	1050	0.499	13.388	1.161	1300	0	0	0	110.69							1050	0.536	13.388	1.219	1300	0	0	0	110.69			1050	0.544	13.389	1.24	1300	0	0	0	110.7			1050	0.551	13.389	1.263	1300	1.686	0	0	110.7			1050
	1100	0.491	14.032	1.161	1300	0	0	0	115.83							1100	0.528	14.034	1.219	1300	0	0	0	115.84			1100	0.535	14.034	1.24	1300	0	0	0	115.84			1100	0.543	14.035	1.263	1300	1.685	0	0	115.84			1100
	1150	0.483	14.677	1.161	1300	0	0	0	120.69							1150	0.519	14.679	1.219	1300	0	0	0	120.69			1150	0.526	14.68	1.24	1300	0	0	0	120.69			1150	0.534	14.681	1.263	1300	1.683	0	0	120.7			1150
	1200	0.475	15.322	1.161	1300	0	0	0	125.48							1200	0.511	15.325	1.219	1300	0	0	0	125.48			1200	0.518	15.326	1.24	1300	0	0	0	125.49			1200	0.525	15.327	1.263	1300	1.682	0	0	125.49			1200
	1250	0.467	15.967	1.161	1300	0	0	0	130.04							1250	0.502	15.97	1.219	1300	0	0	0	130.04			1250	0.509	15.971	1.24	1300	0	0	0	130.05			1250	0.516	15.973	1.263	1300	1.681	0	0	130.05			1250
	1300	0.46	16.611	1.161	1300	0	0	0	134.53							1300	0.494	16.615	1.219	1300	0	0	0	134.54			1300	0.5	16.617	1.24	1300	0	0	0	134.54			1300	0.507	16.618	1.263	1300	1.68	0	0	134.55			1300
	1350	0.452	17.256	1.161	1300	0	0	0	138.74							1350	0.486	17.261	1.219	1300	0	0	0	138.75			1350	0.492	17.263	1.24	1300	0	0	0	138.75			1350	0.498	17.264	1.263	1299.99	1.679	0	0	138.76			1350
	1400	0.444	17.901	1.161	1300	0	0	0	142.79							1400	0.477	17.906	1.219	1300	0	0	0	142.8			1400	0.483	17.908	1.24	1300	0	0	0	142.8			1400	0.489	17.91	1.263	1299.99	1.677	0	0	142.81			1400
	1450	0.436	18.546	1.161	1300	0	0	0	146.69							1450	0.469	18.552	1.219	1300	0	0	0	146.7			1450	0.475	18.554	1.24	1300	0	0	0	146.71			1450	0.48	18.556	1.263	1299.98	1.676	0	0	146.72			1450
	1500	0.429	19.191	1.161	1300	0	0	0	150.44							1500	0.46	19.197	1.219	1300	0	0	0	150.45			1500	0.466	19.2	1.24	1300	1.648	0	0	150.46			1500	0.472	19.202	1.263	1299.96	1.675	0	0	150.47			1500
	1550	0.421	19.835	1.161	1300	0	0	0	154.1							1550	0.452	19.842	1.219	1300	0	0	0	154.1			1550	0.457	19.845	1.24	1300	1.647	0	0	154.11			1550	0.463	19.848	1.263	1299.94	1.674	0	0	154.13			1550
	1600	0.413	20.48	1.161	1300	0	0	0	157.61							1600	0.444	20.488	1.219	1300	0	0	0	157.62			1600	0.449	20.491	1.24	1300	1.646	0	0	157.63			1600	0.454	20.494	1.263	1299.9	1.673	0	0	157.64			1600
	1650	0.405	21.125	1.161	1300	0	0	0	160.99							1650	0.435	21.133	1.219	1300	0	0	0	161			1650	0.44	21.137	1.24	1300	1.645	0	0	161.01			1650	0.445	21.14	1.263	1299.85	1.672	0	0	161.02			1650
	1700	0.398	21.77	1.161	1300	0	0	0	164.24							1700	0.427	21.779	1.219	1300	0	0	0	164.25			1700	0.431	21.782	1.24	1300	1.644	0	0	164.26			1700	0.436	21.785	1.263	1299.76	1.671	0	0	164.27			1700
	1750	0.39	22.414	1.161	1300	1.548	0	0	167.36							1750	0.419	22.424	1.219	1300	0	0	0	167.37			1750	0.423	22.428	1.24	1299.99	1.643	0	0	167.39			1750	0.427	22.431	1.263	1299.63	1.67	0	0	167.4			1750
	1800	0.382	23.059	1.161	1300	1.547	0	0	170.28							1800	0.41	23.069	1.219	1300	0	0	0	170.28			1800	0.414	23.073	1.24	1299.99	1.642	0	0	170.29			1800	0.418	23.077	1.263	1299.44	1.669	0	0	170.31			1800
	1850	0.374	23.704	1.161	1300	1.546	0	0	173.07							1850	0.402	23.715	1.219	1300	0	0	0	173.08			1850	0.406	23.719	1.24	1299.98	1.641	0	0	173.1			1850	0.409	23.722	1.262	1299.15	1.668	0	0	173.11			1850
	1900	0.367	24.349	1.161	1300	1.545	0	0	175.76							1900	0.393	24.36	1.219	1300	0	0	0	175.77			1900	0.397	24.365	1.24	1299.97	1.64	0	0	175.79			1900	0.4	24.368	1.262	1298.73	1.667	0	0	175.8			1900
	1950	0.359	24.994	1.161	1300	1.544	0	0	178.35							1950	0.385	25.006	1.219	1300	0	0	0	178.36			1950	0.388	25.01	1.24	1299.94	1.639	0	0	178.37			1950	0.392	25.013	1.262	1298.12	1.666	0	0	178.39			1950
	2000	0.351	25.638	1.161	1299.99	1.543	0	0	180.84							2000	0.377	25.651	1.219	1300	0	0	0	180.85			2000	0.38	25.656	1.24	1299.91	1.638	0	0	180.87			2000	0.383	25.657	1.262	1297.27	1.665	0	0	180.88			2000
	2050	0.343	26.283	1.161	1299.98	1.542	0	0	183.24							2050	0.368	26.296	1.219	1300	1.612	0	0	183.25			2050	0.371	26.301	1.24	1299.84	1.637	0	0	183.27			2050	0.374	26.302	1.261	1296.08	1.664	0	0	183.28			2050
	2100	0.336	26.928	1.161	1299.97	1.541	0	0	185.65							2100	0.36	26.942	1.219	1300	1.611	0	0	185.66			2100	0.362	26.947	1.24	1299.74	1.636	0	0	185.68			2100	0.365	26.945	1.261	1294.45	1.663	0	0	185.69			2100
	2150	0.328	27.573	1.161	1299.95	1.541	0	0	187.98							2150	0.351	27.587	1.219	1300	1.61	0	0	187.99			2150	0.354	27.592	1.24	1299.58	1.635	0	0	188			2150	0.356	27.588	1.26	1292.28	1.662	0	0	188.02			2150
	2200	0.32	28.217	1.161	1299.92	1.54	0	0	190.22							2200	0.343	28.233	1.219	1300	1.609	0	0	190.23			2200	0.345	28.238	1.24	1299.34	1.635	0	0	190.24	0		2200	0.347	28.229	1.259	1289.62	1.661	0	0	190.26			2200
	2250	0.312	28.862	1.161	1299.86	1.539	0	0	192.3							2250	0.335	28.878	1.219	1299.99	1.608	0	0	192.31			2250	0.337	28.883	1.24	1298.96	1.634	0	0	192.32	0		2250	0.339	28.869	1.257	1286.18	1.66	0	0	192.33			2250
	2300	0.305	29.507	1.161	1299.76	1.538	0	0	194.39							2300	0.326	29.523	1.219	1299.99	1.607	0	0	194.41			2300	0.328	29.528	1.24	1298.38	1.633	0	0	194.42	0		2300	0.33	29.507	1.256	1282	1.659	0	0	194.43			2300
	2350	0.297	30.151	1.161	1299.6	1.537	0	0	196.51		0	0	0	0		2350	0.318	30.169	1.219	1299.98	1.606	0	0	196.53			2350	0.319	30.173	1.239	1297.54	1.632	0	0	196.54	0		2350	0.321	30.143	1.253	1277.03	1.658	0	0	196.55			2350
	2400	0.289	30.796	1.161	1299.35	1.536	0	0	198.48		0	0	0	0		2400	0.309	30.814	1.219	1299.96	1.605	0	0	198.49			2400	0.311	30.817	1.239	1296.31	1.631	0	0	198.51	0		2400	0.312	30.776	1.251	1271.28	1.657	0	0	198.52			2400
	2450	0.281	31.44	1.161	1298.97	1.535	0	0	200.29		0	0	0	0		2450	0.301	31.46	1.219	1299.92	1.605	0	0	200.3			2450	0.302	31.46	1.238	1294.57	1.63	0	0	200.32	0		2450	0.304	31.406	1.248	1264.78	1.655	0	0	200.33			2450
	2500	0.274	32.084	1.161	1298.38	1.534	0	0	202.14		0	0	0	0		2500	0.293	32.105	1.219	1299.86	1.604	0	0	202.15			2500	0.294	32.102	1.237	1292.29	1.629	0	0	202.17	0		2500	0.295	32.032	1.245	1257.65	1.654	0	0	202.18			2500
	2550	0.266	32.728	1.16	1297.52	1.534	0	0	204.01		0	0	0	0		2550	0.284	32.75	1.219	1299.76	1.603	0	0	204.02			2550	0.285	32.743	1.236	1289.18	1.628	0	0	204.04	0		2550	0.287	32.655	1.241	1250.06	1.653	0.001	0	204.05	0.00141878	0.289502	2550
	2600	0.258	33.371	1.16	1296.28	1.533	0	0	205.83		0	0	0	0		2600	0.276	33.395	1.219	1299.57	1.602	0	0	205.84			2600	0.276	33.383	1.235	1285.23	1.627	0	0	205.86	0		2600	0.278	33.274	1.238	1242.25	1.651	0.00712	0	205.88	0.0101017	2.07974	2600
	2650	0.25	34.014	1.159	1294.53	1.532	0	0	207.6		0	0	0	0		2650	0.268	34.041	1.219	1299.27	1.601	0	0	207.61	0		2650	0.268	34.02	1.233	1280.34	1.626	0	0	207.63	0		2650	0.27	33.889	1.234	1234.48	1.65	0.1006	0	207.65	0.14273	29.6378	2650
	2700	0.243	34.655	1.158	1292.28	1.531	0	0	209.32		0	0	0	0		2700	0.259	34.685	1.218	1298.78	1.6	0	0	209.33	0		2700	0.259	34.654	1.23	1274.45	1.625	0	0	209.35	0		2700	0.261	34.5	1.23	1227.04	1.648	0.109704	0	209.36	0.155646	32.5861	2700
	2750	0.235	35.295	1.157	1289.29	1.53	0	0	210.99		0	0	0	0		2750	0.251	35.33	1.218	1297.99	1.599	0	0	211.01	0		2750	0.251	35.285	1.227	1267.6	1.624	0	0	211.02	0		2750	0.253	35.108	1.227	1220.19	1.646	0.108831	0	211.04	0.154407	32.5861	2750
	2800	0.227	35.934	1.156	1285.62	1.529	0	0	212.62		0	0	0	0		2800	0.242	35.974	1.218	1296.77	1.599	0	0	212.63	0		2800	0.243	35.913	1.224	1259.9	1.623	0	0	212.65	0		2800	0.245	35.713	1.224	1214.13	1.645	0.108002	0	212.66	0.153231	32.5861	2800
	2850	0.22	36.57	1.154	1281.27	1.528	0	0	214.2		0	0	0	0		2850	0.234	36.617	1.217	1294.9	1.598	0	0	214.21	0		2850	0.234	36.537	1.221	1251.58	1.622	0.01	0	214.23	0.0141878	3.03945	2850	0.237	36.314	1.221	1209.01	1.643	0.1072	0	214.25	0.152094	32.5861	2850
	2900	0.212	37.205	1.152	1276.31	1.527	0	0	215.83		0	0	0	0		2900	0.226	37.26	1.216	1292.35	1.597	0	0	215.84	0		2900	0.226	37.156	1.217	1242.96	1.62	0.0856322	0	215.86	0.121493	26.2255	2900	0.229	36.914	1.218	1204.85	1.641	0.106396	0	215.87	0.150952	32.5861	2900
	2950	0.204	37.836	1.15	1270.9	1.526	0	0	217.33		0	0	0	0	0	2950	0.217	37.9	1.215	1288.7	1.596	0	0	217.34	0		2950	0.218	37.771	1.213	1234.44	1.619	0.0985514	0	217.36	0.139823	30.3919	2950	0.22	37.511	1.216	1201.61	1.639	0.105662	0	217.37	0.149911	32.5861	2950
	3000	0.197	38.465	1.148	1265.28	1.525	0	0	218.87		0	0	0	0	0	3000	0.209	38.539	1.213	1283.85	1.595	0	0	218.88	0		3000	0.21	38.382	1.209	1226.41	1.617	0.097858	0	218.9	0.138839	30.3919	3000	0.212	38.107	1.214	1199	1.637	0.104918	0	218.91	0.148856	32.5861	3000
	3050	0.189	39.091	1.146	1259.74	1.524	0	0	220.54		0	0	0	0	0	3050	0.201	39.175	1.211	1277.63	1.594	0	0	220.55	0		3050	0.202	38.989	1.206	1219.25	1.616	0.0971171	0	220.57	0.137788	30.3919	3050	0.204	38.702	1.213	1197.09	1.636	0.104124	0	220.58	0.147729	32.5861	3050
	3100	0.182	39.715	1.144	1254.6	1.522	0	0	222.17		0.00327874	0	1.03349	0	1.03349	3100	0.193	39.807	1.208	1270.01	1.593	0	0	222.18	0		3100	0.194	39.593	1.203	1213.21	1.614	0.0964047	0	222.2	0.136777	30.3919	3100	0.196	39.297	1.211	1195.59	1.634	0.10336	0	222.21	0.146645	32.5861	3100
	3150	0.174	40.336	1.142	1250.11	1.521	0.0592698	0	223.76	0.0318279	0.0318279	15.8986	10.1043	0.0910977	26.0029	3150	0.184	40.436	1.204	1261.11	1.592	0	0	223.77	0		3150	0.186	40.194	1.2	1208.41	1.612	0.0957198	0	223.79	0.135805	30.3919	3150	0.188	39.89	1.21	1194.38	1.632	0.10263	0	223.79	0.14561	32.5861	3150
	3200	0.167	40.955	1.14	1246.45	1.52	0.0588595	0.00306	225.32	0.0141435	0.0317984	15.8986	10.1653	0.0906578	26.0639	3200	0.176	41.059	1.2	1251.29	1.59	0.0802236	0	225.33	0.11382		3200	0.178	40.793	1.198	1204.8	1.611	0.0950571	0	225.35	0.134865	30.3919	3200	0.18	40.483	1.209	1193.34	1.631	0.101933	0	225.32	0.144621	32.5861	3200
	3250	0.16	41.572	1.139	1243.52	1.518	0.0584651	0.00376	226.84	0.0102213	0.0317696	15.8986	10.2246	0.0902346	26.1232	3250	0.168	41.678	1.196	1241.1	1.589	0.0874438	0	226.85	0.124064		3250	0.17	41.391	1.196	1202.07	1.609	0.0944203	0	226.87	0.133962	30.3919	3250	0.172	41.075	1.208	1192.38	1.629	0.101277	0	226.78	0.14369	32.5861	3250
	3300	0.152	42.188	1.137	1241.56	1.517	0.0576741	0.0044	228.41	0.00669712	0.0317398	15.7921	10.2857	0.0894139	26.0778	3300	0.16	42.291	1.192	1231.27	1.588	0.0868427	0	228.42	0.123211		3300	0.162	41.987	1.195	1200.27	1.607	0.0937754	0	228.43	0.133047	30.3919	3300	0.164	41.667	1.207	1191.52	1.627	0.100656	0	228.18	0.142809	32.5861	3300
	3350	0.142	42.806	1.255	1239.65	1.66	0.0572904	0.00488	229.94	0.00412098	0.0317108	15.7921	10.3452	0.0890012	26.1373	3350	0.15	42.903	1.312	1222.62	1.737	0.0862612	0	229.96	0.122386		3350	0.151	42.585	1.318	1198.14	1.759	0.0931556	0	229.95	0.132167	30.3919	3350	0.153	42.261	1.332	1189.84	1.78	0.100107	0	229.43	0.14203	32.5861	3350
	3400	0.132	43.423	1.254	1238.65	1.658	0.0568797	0.00522	231.6	0.00237876	0.0316793	15.7921	10.4095	0.088559	26.2016	3400	0.139	43.511	1.308	1215.87	1.735	0.0856429	0	231.62	0.121509		3400	0.14	43.183	1.317	1197.11	1.757	0.0924999	0	231.58	0.131237	30.3919	3400	0.142	42.855	1.331	1189.01	1.778	0.0995046	0	230.82	0.141175	32.5861	3400
	3450	0.122	44.04	1.254	1237.89	1.657	0.0564822	0.00543	233.23	0.00138205	0.0316483	15.7921	10.4725	0.0881305	26.2646	3450	0.128	44.116	1.306	1210.68	1.734	0.0850481	0	233.24	0.120665		3450	0.13	43.78	1.316	1196.21	1.755	0.0918809	0	233.14	0.130359	30.3919	3450	0.131	43.448	1.33	1188.17	1.777	0.0989217	0	232.18	0.140348	32.5861	3450
	3500	0.112	44.657	1.253	1237.24	1.655	0.0560878	0.00552	234.87	0.00106405	0.0316171	15.7921	10.5357	0.087705	26.3279	3500	0.117	44.719	1.303	1207.02	1.732	0.0844578	0	234.87	0.119827		3500	0.119	44.376	1.315	1195.35	1.754	0.0912819	0	234.67	0.129509	30.3919	3500	0.12	44.041	1.328	1187.32	1.775	0.0983414	0	233.55	0.139525	32.5861	3500
	3550	0.101	45.273	1.252	1236.64	1.654	0.0556989	0.00555	236.51	0.00107981	0.0315859	15.7921	10.5988	0.0872848	26.391	3550	0.107	45.321	1.302	1204.46	1.73	0.0838828	0	236.48	0.119011		3550	0.108	44.973	1.314	1194.51	1.752	0.090706	0	236.16	0.128692	30.3919	3550	0.109	44.634	1.327	1186.44	1.773	0.0977638	0	234.93	0.138705	32.5861	3550
	3600	0.091	45.889	1.252	1236.06	1.652	0.0553037	0.00557	238.2	0.0011549	0.0315537	15.7921	10.6637	0.0868575	26.4558	3600	0.096	45.921	1.301	1202.85	1.729	0.0833086	0	238.11	0.118197		3600	0.097	45.568	1.313	1193.66	1.75	0.0901411	0	237.64	0.12789	30.3919	3600	0.098	45.226	1.326	1185.54	1.771	0.0971641	0	236.38	0.137855	32.5861	3600
	3650	0.081	46.504	1.251	1235.48	1.651	0.0548958	0.00558	239.97	0.00129121	0.03152	15.7921	10.7314	0.0864158	26.5236	3650	0.085	46.521	1.3	1201.7	1.727	0.0827284	0	239.78	0.117373		3650	0.086	46.164	1.313	1192.8	1.748	0.0895644	0	239.17	0.127072	30.3919	3650	0.087	45.817	1.325	1184.61	1.769	0.0965311	0	237.93	0.136956	32.5861	3650
	3700	0.071	47.12	1.251	1234.89	1.649	0.0544916	0.0056	241.75	0.00137227	0.031486	15.7921	10.7994	0.0859776	26.5915	3700	0.075	47.12	1.299	1200.76	1.725	0.0821732	0	241.4	0.116586		3700	0.076	46.759	1.312	1191.92	1.746	0.0890025	0	240.68	0.126275	30.3919	3700	0.077	46.408	1.324	1183.66	1.767	0.0959023	0	239.49	0.136064	32.5861	3700
	3750	0.061	47.735	1.25	1234.34	1.647	0.0541	0.00561	243.5	0.00150188	0.0314526	15.7921	10.866	0.0855526	26.6581	3750	0.064	47.719	1.298	1199.96	1.723	0.0816422	0	242.97	0.115832		3750	0.065	47.353	1.311	1191.1	1.744	0.0884403	0	242.21	0.125477	30.3919	3750	0.066	46.999	1.323	1182.77	1.765	0.0952698	0	241.08	0.135167	32.5861	3750
	3800	0.045	48.355	1.509	1233.02	1.961	0.0587693	0.00563	245.26	0.00157716	0.031419	17.2791	9.23767	0.0901882	26.5168	3800	0.047	48.323	1.567	1198.05	2.053	0.096	0	244.55	0.115084		3800	0.048	47.953	1.582	1189.07	2.078	0.104	0	243.77	0.124674	30.3919	3800	0.048	47.595	1.597	1180.58	2.103	0.112	0	242.7	0.134265	32.5861	3800
	3850	0.033	48.971	1.34	1232.93	1.755	0.0583458	0.00564	247.04	0.0017055	0.0313849	17.2791	9.29463	0.0897307	26.5737	3850	0.035	48.922	1.391	1197.93	1.836	0.0953489	0	246.22	0.114304		3850	0.036	48.548	1.405	1188.96	1.858	0.103297	0	245.43	0.123831	30.3919	3850	0.036	48.186	1.418	1180.44	1.88	0.111216	0	244.41	0.133325	32.5861	3850
	3900	0.022	49.586	1.34	1232.35	1.753	0.0579331	0.00566	248.8	0.00177725	0.0313512	17.2791	9.3508	0.0892843	26.6299	3900	0.023	49.52	1.39	1197.11	1.834	0.0946912	0	247.93	0.113515		3900	0.024	49.142	1.404	1188.09	1.856	0.102582	0	247.14	0.122974	30.3919	3900	0.024	48.776	1.417	1179.48	1.878	0.110412	0	246.19	0.132361	32.5861	3900
	3950	0.011	50.201	1.339	1231.75	1.751	0.0575376	0.00567	250.51	0.00189446	0.0313184	17.2791	9.40522	0.0888561	26.6843	3950	0.012	50.118	1.39	1196.27	1.832	0.0940502	0	249.62	0.112747		3950	0.012	49.736	1.403	1187.19	1.854	0.101885	0	248.83	0.122139	30.3919	3950	0.012	49.366	1.416	1178.49	1.876	0.10962	0	247.97	0.131411	32.5861	3950
	4000	0	50.791	1.339	1231.2	1.75	0.0571	0.00569	252.43	0.00197843	0.0312816	17.2791	9.46616	0.0883816	26.7453	4000	0	50.692	1.389	1195.5	1.83	0.0933286	0	251.55	0.111882	28.1438	4000	0	50.306	1.402	1186.37	1.852	0.101109	0	250.74	0.121209	30.3919	4000	0	49.931	1.415	1177.57	1.874	0.108743	0	249.97	0.13036	32.5861	4000
					井深	Rb	Bn	V悬浮																																							4	553.963
					2700	0.000502597	1.11688	0.0321																										A1	0.0283756	3.00009	364.703						30.248	0.00718385
					2750	0.000502983	1.11774	0.0320687											A1	0.0283756		0.0880336				28.1438								A2	0.0239758						A1	0.0283756	30.2847	0.101465
					2800	0.000503359	1.11858	0.032038											A2	0.0239758		0.0874438																			A2	0.0239758	30.303	0.110607
			A1	0.0283756	2850	0.000503725	1.11939	0.0320083							#NAME?							0.0868427													0.0957198								30.3398	0.109704
			A2	0.0239758	2900	0.000504104	1.12023	0.0319776														0.0862612			2.00001																		30.3767	0.108831
					2950	0.000504453	1.12101	0.0319493														0.0856429										30.8261	0.0992362	`									30.3951	0.108002
					3000	0.000504812	1.1218	0.0319203	0												31.4465	0.0850481										30.8642	0.0985514										30.4321	0.1072
				Bnc2	3050	0.000505203	1.12267	0.0318887	0												31.4663	0.0844578										30.8833	0.097858										30.4692	0.106396
				0.273797	3100	0.000505584	1.12352	0.0318579	0.059694												31.4861	0.0838828										30.9215	0.0971171										30.5064	0.105662
					3150	0.000505958	1.12435	0.0318279	0.0592698												28.7853	0.0833086										30.9406	0.0964047										30.5437	0.104918
					3200	0.000506325	1.12517	0.0317984	0.0588595		0.0883816										28.8184	0.0827284										30.9789	0.0957198										30.5623	0.104124
					3250	0.000506683	1.12596	0.0317696	0.0580733												28.8351	0.0821732										31.0174	0.0950571										30.5998	0.10336
					3300	0.000507054	1.12679	0.0317398	0.0576741												28.8684	0.0816422										31.0366	0.0944203										30.6373	0.10263
					3350	0.000507417	1.12759	0.0317108	0.0572904		3550										28.9017	0.0953489										31.0752	0.0937754										30.656	0.101933
					3400	0.000507811	1.12847	0.0316793	0.0568797		3200										28.9184	0.0946912										31.1139	0.0931556										30.6937	0.101277
					3450	0.000508199	1.12933	0.0316483	0.0564822		2850										28.9519	0.0940502										28.4252	0.0924999										30.7314	0.100656
					3500	0.00050859	1.1302	0.0316171	0.0560878		2550										28.9855	0.0933286										28.4576	0.0918809										28.0899	0.100107
					3550	0.000508982	1.13107	0.0315859	0.0556989		2300										29.0192	#DIV/0!										28.49	0.0912819										28.1215	0.0995046
					3600	0.000509387	1.13197	0.0315537	0.0553037												24.3546											28.5063	0.090706										28.1373	0.0989217
					3650	0.000509812	1.13291	0.03152	0.0548958												27.2331											28.5388	0.0901411										28.169	0.0983414
					3700	0.00051024	1.13387	0.031486	0.0544916												27.2628											28.5714	0.0895644										28.2008	0.0977638
					3750	0.000510663	1.13481	0.0314526	0.0591941												27.2926											28.6041	0.0890025										28.2326	0.0971641
					3800	0.000511089	1.13575	0.031419	0.0587693												27.3224											28.6369	0.0884403										28.2646	0.0965311
					3850	0.00051152	1.13671	0.0313849	0.0583458																							28.6697	0.103297										28.2965	0.0959023
					3900	0.000511948	1.13766	0.0313512	0.0579331																							24.0616	0.102582										28.3286	0.0952698
					3950	0.000512365	1.13859	0.0313184	0.0575376																							26.9107	0.101885										23.7756
					4000	0.000512835	1.13963	0.0312816																								26.9397	0.101109										26.5957	0.111216
																																26.9687	#DIV/0!										26.6241	0.110412
																																26.9978											26.6525	0.10962
																																											26.6809	0.108743
																					487.948
																																698.436
																																											871.949
[truncated: 12 more columns]

## Sheet: 钻井液密度对悬浮浓度
	无溶解、无悬浮									悬浮气泡半径						Bn						Vfc
	井深m	环空压耗	环空压力	泥浆流速m/s	平均密度	实际气速	自由气VF	悬浮气体积	气体密度	1000	1100	1200	1500	1700	2000	1000	1100	1200	1500	1700	2000	1000	1100	1200	1500	1700	2000
	0	0.547	0	0.182	1300	0	0	0	0.68051	0	0	0	0	0	0	0	0	0	0	0	0	0	0	0	0	0	0
	50	0.547	0.637	0.182	1300	0	0	0	5.0864	0	0	0	0	0	0	0	0	0	0	0	0	0	0	0	0	0	0
	100	0.547	1.274	0.182	1300	0	0	0	9.6243	0	0	0	0	0	0	0	0	0	0	0	0	0	0	0	0	0	0
	150	0.547	1.912	0.182	1300	0	0	0	14.301	0	0	0	0	0	0	0	0	0	0	0	0	0	0	0	0	0	0
	200	0.547	2.549	0.182	1300	0	0	0	19.148	0	0	0	0	0	0	0	0	0	0	0	0	0	0	0	0	0	0
	250	0.547	3.186	0.182	1300	0	0	0	24.162	0	0	0	0	0	0	0	0	0	0	0	0	0	0	0	0	0	0
	300	0.546	3.823	0.182	1300	0	0	0	29.34	0	0	0	0	0	0	0	0	0	0	0	0	0	0	0	0	0	0
	350	0.546	4.46	0.182	1300	0	0	0	34.714	0	0	0	0	0	0	0	0	0	0	0	0	0	0	0	0	0	0
	400	0.546	5.097	0.182	1300	0	0	0	40.25	0	0	0	0	0	0	0	0	0	0	0	0	0	0	0	0	0	0
	450	0.546	5.735	0.182	1300	0	0	0	45.951	0	0	0	0	0	0	0	0	0	0	0	0	0	0	0	0	0	0
	500	0.546	6.372	0.182	1300	0	0	0	51.869	0	0	0	0	0	0	0	0	0	0	0	0	0	0	0	0	0	0
	550	0.546	7.009	0.182	1300	0	0	0	57.895	0	0	0	0	0	0	0	0	0	0	0	0	0	0	0	0	0	0
	600	0.545	7.646	0.182	1300	0	0	0	64.071	0	0	0	0	0	0	0	0	0	0	0	0	0	0	0	0	0	0
	650	0.545	8.283	0.182	1300	0	0	0	70.404	0	0	0	0	0	0	0	0	0	0	0	0	0	0	0	0	0	0
	700	0.545	8.92	0.182	1300	0	0	0	76.695	0	0	0	0	0	0	0	0	0	0	0	0	0	0	0	0	0	0
	750	0.545	9.557	0.182	1300	0	0	0	83.009	0	0	0	0	0	0	0	0	0	0	0	0	0	0	0	0	0	0
	800	0.545	10.195	0.182	1300	0	0	0	89.173	0	0	0	0	0	0	0	0	0	0	0	0	0	0	0	0	0	0
	850	0.545	10.832	0.182	1300	0	0	0	95.035	0	0	0	0	0	0	0	0	0	0	0	0	0	0	0	0	0	0
	900	0.545	11.469	0.182	1300	0	0	0	100.05	0	0	0	0	0	0	0	0	0	0	0	0	0	0	0	0	0	0
	950	0.544	12.106	0.182	1300	0	0	0	104.19	0	0	0	0	0	0	0	0	0	0	0	0	0	0	0	0	0	0
	1000	0.544	12.743	0.182	1300	0	0	0	107.16	0	0	0	0	0	0	0	0	0	0	0	0	0	0	0	0	0	0
	1050	0.536	13.388	1.219	1300	0	0	0	110.69	0	0	0	0	0	0	0	0	0	0	0	0	0	0	0	0	0	0
	1100	0.528	14.034	1.219	1300	0	0	0	115.84	0	0	0	0	0	0	0	0	0	0	0	0	0	0	0	0	0	0
	1150	0.519	14.679	1.219	1300	0	0	0	120.69	0	0	0	0	0	0	0	0	0	0	0	0	0	0	0	0	0	0
	1200	0.511	15.325	1.219	1300	0	0	0	125.48	0	0	0	0	0	0	0	0	0	0	0	0	0	0	0	0	0	0
	1250	0.502	15.97	1.219	1300	0	0	0	130.04	0	0	0	0	0	0	0	0	0	0	0	0	0	0	0	0	0	0
	1300	0.494	16.615	1.219	1300	0	0	0	134.54	0	0	0	0	0	0	0	0	0	0	0	0	0	0	0	0	0	0
	1350	0.486	17.261	1.219	1300	0	0	0	138.75	0	0	0	0	0	0	0	0	0	0	0	0	0	0	0	0	0	0
	1400	0.477	17.906	1.219	1300	0	0	0	142.8	0	0	0	0	0	0	0	0	0	0	0	0	0	0	0	0	0	0
	1450	0.469	18.552	1.219	1300	0	0	0	146.7	0	0	0	0	0	0	0	0	0	0	0	0	0	0	0	0	0	0
	1500	0.46	19.197	1.219	1300	0	0	0	150.45	0	0	0	0	0	0	0	0	0	0	0	0	0	0	0	0	0	0
	1550	0.452	19.842	1.219	1300	0	0	0	154.1	0	0	0	0	0	0	0	0	0	0	0	0	0	0	0	0	0	0
	1600	0.444	20.488	1.219	1300	0	0	0	157.62	0	0	0	0	0	0	0	0	0	0	0	0	0	0	0	0	0	0
	1650	0.435	21.133	1.219	1300	0	0	0	161	0	0	0	0	0	0	0	0	0	0	0	0	0	0	0	0	0	0
	1700	0.427	21.779	1.219	1300	0	0	0	164.25	0	0	0	0	0	0	0	0	0	0	0	0	0	0	0	0	0	0
	1750	0.419	22.424	1.219	1300	0	0	0	167.37	0	0	0	0	0	0	0	0	0	0	0	0	0	0	0	0	0	0
	1800	0.41	23.069	1.219	1300	0	0	0	170.28	0	0	0	0	0	0	0	0	0	0	0	0	0	0	0	0	0	0
	1850	0.402	23.715	1.219	1300	0	0	0	173.08	0	0	0	0	0	0	0	0	0	0	0	0	0	0	0	0	0	0
	1900	0.393	24.36	1.219	1300	0	0	0	175.77	0	0	0	0	0	0	0	0	0	0	0	0	0	0	0	0	0	0
	1950	0.385	25.006	1.219	1300	0	0	0	178.36	0	0	0	0	0	0	0	0	0	0	0	0	0	0	0	0	0	0
	2000	0.377	25.651	1.219	1300	0	0	0	180.85	0	0	0	0	0	0	0	0	0	0	0	0	0	0	0	0	0	0
	2050	0.368	26.296	1.219	1300	1.612	0	0	183.25	0	0	0	0	0	0	0	0	0	0	0	0	0	0	0	0	0	0
	2100	0.36	26.942	1.219	1300	1.611	0	0	185.66	0	0	0	0	0	0	0	0	0	0	0	0	0	0	0	0	0	0
	2150	0.351	27.587	1.219	1300	1.61	0	0	187.99	0	0	0	0	0	0	0	0	0	0	0	0	0	0	0	0	0	0
	2200	0.343	28.233	1.219	1300	1.609	0	0	190.23	0	0	0	0	0	0	0	0	0	0	0	0	0	0	0	0	0	0
	2250	0.335	28.878	1.219	1299.99	1.608	0	0	192.31	0	0	0	0	0	0	0	0	0	0	0	0	0	0	0	0	0	0
	2300	0.326	29.523	1.219	1299.99	1.607	0	0	194.41	0	0	0	0	0	0	0	0	0	0	0	0	0	0	0	0	0	0
	2350	0.318	30.169	1.219	1299.98	1.606	0	0	196.53	0	0	0	0	0	0	0	0	0	0	0	0	0	0	0	0	0	0
	2400	0.309	30.814	1.219	1299.96	1.605	0	0	198.49	0	0	0	0	0	0	0	0	0	0	0	0	0	0	0	0	0	0
	2450	0.301	31.46	1.219	1299.92	1.605	0	0	200.3	0	0	0	0	0	0	0	0	0	0	0	0	0	0	0	0	0	0
	2500	0.293	32.105	1.219	1299.86	1.604	0	0	202.15	0	0	0	0	0	0	0	0	0	0	0	0	0	0	0	0	0	0
	2550	0.284	32.75	1.219	1299.76	1.603	0	0	204.02	0	0	0	0	0	0	0	0	0	0	0	0	0	0	0	0	0	0
	2600	0.276	33.395	1.219	1299.57	1.602	0	0	205.84	0	0	0	0	0	0	0	0	0	0	0	0	0	0	0	0	0	0
	2650	0.268	34.041	1.219	1299.27	1.601	0	0	207.61	0	0	0	0	0	0	0	0	0	0	0	0	0	0	0	0	0	0
	2700	0.259	34.685	1.218	1298.78	1.6	0	0	209.33	0	0	0	0	0	0	0	0	0	0	0	0	0	0	0	0	0	0
	2750	0.251	35.33	1.218	1297.99	1.599	0	0	211.01	0	0	0	0	0	0	0	0	0	0	0	0	0	0	0	0	0	0
	2800	0.242	35.974	1.218	1296.77	1.599	0	0	212.63	0	0	0	0	0	0	0	0	0	0	0	0	0	0	0	0	0	0
	2850	0.234	36.617	1.217	1294.9	1.598	0	0	214.21	0	0	0	0	0	0	0	0	0	0	0	0	0	0	0	0	0	0
	2900	0.226	37.26	1.216	1292.35	1.597	0	0	215.84	0	0	0	0	0	0	0	0	0	0	0	0	0	0	0	0	0	0
	2950	0.217	37.9	1.215	1288.7	1.596	0	0	217.34	0	0	0	0	0	0	0	0	0	0	0	0	0	0	0	0	0	0
	3000	0.209	38.539	1.213	1283.85	1.595	0	0	218.88	0	0	0	0	0	0	0	0	0	0	0	0	0	0	0	0	0	0
	3050	0.201	39.175	1.211	1277.63	1.594	0	0	220.55	0	0	0	0	0	0	0	0	0	0	0	0	0	0	0	0	0	0
	3100	0.193	39.807	1.208	1270.01	1.593	0	0.00327874	222.18	0.000595154	0.00056023	0.00053081	0.000464338	0.000431776	0.000393663	1.32256	1.24495	1.17958	1.03186	0.959501	0.874807	0.00327874	0.00327874	0.00327874	0.00327874	0.00327874	0.00327874
	3150	0.184	40.436	1.204	1261.11	1.592	0	0.0318279	223.77	0.000595763	0.000560738	0.000531242	0.000464627	0.000432008	0.000393839	1.32392	1.24608	1.18054	1.0325	0.960018	0.875199	0.0256684	0.0278385	0.0298867	0.035434	0.038731	0.0432081
	3200	0.176	41.059	1.2	1251.29	1.59	0.0426178	0.0317984	225.33	0.000596363	0.000561238	0.000531667	0.000464911	0.000432236	0.000394013	1.32525	1.24719	1.18148	1.03314	0.960526	0.875583	0.0256335	0.0278056	0.0298556	0.0354072	0.0387063	0.0431861
	3250	0.168	41.678	1.196	1241.1	1.589	0.0874438	0.0317696	226.85	0.000596949	0.000561726	0.000532082	0.000465189	0.000432459	0.000394181	1.32655	1.24828	1.18241	1.03375	0.961021	0.875959	0.0255994	0.0277735	0.0298252	0.035381	0.0386822	0.0431646
	3300	0.16	42.291	1.192	1231.27	1.588	0.09052	0.0317398	228.42	0.000597556	0.000562232	0.000532512	0.000465476	0.00043269	0.000394356	1.3279	1.2494	1.18336	1.03439	0.961533	0.876347	0.0255642	0.0277404	0.0297939	0.0353539	0.0386574	0.0431424
	3350	0.15	42.903	1.312	1222.62	1.737	0.0899138	0.0317108	229.96	0.000598153	0.000562729	0.000532935	0.000465758	0.000432917	0.000394528	1.32923	1.25051	1.1843	1.03502	0.962037	0.876728	0.0255297	0.0277078	0.0297631	0.0353273	0.038633	0.0431206
	3400	0.139	43.511	1.308	1215.87	1.735	0.0892694	0.0316793	231.62	0.000598799	0.000563267	0.000533391	0.000466062	0.000433161	0.000394713	1.33066	1.2517	1.18531	1.03569	0.962581	0.877139	0.0254924	0.0276727	0.0297299	0.0352987	0.0386067	0.0430972
	3450	0.128	44.116	1.306	1210.68	1.734	0.0886493	0.0316483	233.24	0.000599431	0.000563793	0.000533838	0.00046636	0.0004334	0.000394894	1.33207	1.25287	1.18631	1.03636	0.963112	0.877541	0.025456	0.0276384	0.0296975	0.0352707	0.038581	0.0430742
	3500	0.117	44.719	1.303	1207.02	1.732	0.0874438	0.0316171	234.87	0.000600069	0.000564324	0.000534289	0.000466661	0.000433641	0.000395076	1.33349	1.25405	1.18731	1.03702	0.963648	0.877946	0.0254193	0.0276039	0.0296648	0.0352425	0.0385551	0.0430511
	3550	0.107	45.321	1.302	1204.46	1.73	0.0862612	0.0315859	236.48	0.000600701	0.000564849	0.000534735	0.000466958	0.00043388	0.000395256	1.33489	1.25522	1.1883	1.03768	0.964178	0.878347	0.025383	0.0275698	0.0296325	0.0352147	0.0385296	0.0430283
	3600	0.096	45.921	1.301	1202.85	1.729	0.0856429	0.0315537	238.11	0.000601344	0.000565383	0.000535188	0.000467259	0.000434122	0.000395439	1.33632	1.25641	1.18931	1.03835	0.964715	0.878753	0.0253462	0.0275351	0.0295998	0.0351865	0.0385036	0.0430052
	3650	0.085	46.521	1.3	1201.7	1.727	0.0862612	0.03152	239.78	0.000602004	0.000565932	0.000535653	0.000467569	0.00043437	0.000395626	1.33779	1.25763	1.19034	1.03904	0.965266	0.87917	0.0253085	0.0274997	0.0295663	0.0351575	0.0384771	0.0429815
	3700	0.075	47.12	1.299	1200.76	1.725	0.0868427	0.031486	241.4	0.000602646	0.000566465	0.000536105	0.00046787	0.000434611	0.000395809	1.33921	1.25881	1.19135	1.03971	0.965802	0.879575	0.0252719	0.0274652	0.0295337	0.0351294	0.0384513	0.0429585
	3750	0.064	47.719	1.298	1199.96	1.723	0.0874438	0.0314526	242.97	0.000603271	0.000566984	0.000536545	0.000468162	0.000434845	0.000395985	1.3406	1.25996	1.19232	1.04036	0.966322	0.879968	0.0252363	0.0274318	0.0295021	0.0351022	0.0384263	0.0429362
	3800	0.047	48.323	1.567	1198.05	2.053	0.096	0.031419	244.55	0.000603901	0.000567507	0.000536988	0.000468456	0.000435081	0.000396164	1.342	1.26113	1.19331	1.04101	0.966847	0.880364	0.0252006	0.0273981	0.0294703	0.0350748	0.0384011	0.0429138
	3850	0.035	48.922	1.391	1197.93	1.836	0.0953489	0.0313849	246.22	0.00060457	0.000568062	0.000537458	0.000468768	0.000435331	0.000396352	1.34349	1.26236	1.19435	1.04171	0.967402	0.880783	0.0251627	0.0273625	0.0294366	0.0350458	0.0383745	0.04289
	3900	0.023	49.52	1.39	1197.11	1.834	0.0946912	0.0313512	247.93	0.000605257	0.000568632	0.000537941	0.000469088	0.000435587	0.000396546	1.34502	1.26363	1.19542	1.04242	0.967971	0.881212	0.0251239	0.027326	0.0294021	0.035016	0.0383472	0.0428657
	3950	0.012	50.118	1.39	1196.27	1.832	0.0940502	0.0313184	249.62	0.000605938	0.000569197	0.000538419	0.000469405	0.000435841	0.000396737	1.34653	1.26488	1.19649	1.04312	0.968535	0.881638	0.0250855	0.0272898	0.029368	0.0349866	0.0383202	0.0428416
	4000	0	50.692	1.389	1195.5	1.83	0.0933286	0.0312816	251.55	0.000606719	0.000569844	0.000538966	0.000469768	0.000436131	0.000396956	1.34826	1.26632	1.1977	1.04393	0.96918	0.882124	0.0250416	0.0272486	0.029329	0.034953	0.0382894	0.0428141

## Sheet: 钻井液屈服应力对悬浮浓度
	无溶解、无悬浮										不同屈服应力Bn					Vfc
	井深m	环空压耗	环空压力	泥浆流速m/s	平均密度	实际气速	自由气VF	悬浮气体积	气体密度	1300	1	2	6	8	10	1	2	6	8	10	1Pa总体积
	0	0.547	0	0.182	1300	0	0	0	0.68051	0	0	0	0	0	0	0	0	0	0	0
	50	0.547	0.637	0.182	1300	0	0	0	5.0864	0	0	0	0	0	0	0	0	0	0	0
	100	0.547	1.274	0.182	1300	0	0	0	9.6243	0	0	0	0	0	0	0	0	0	0	0
	150	0.547	1.912	0.182	1300	0	0	0	14.301	0	0	0	0	0	0	0	0	0	0	0
	200	0.547	2.549	0.182	1300	0	0	0	19.148	0	0	0	0	0	0	0	0	0	0	0
	250	0.547	3.186	0.182	1300	0	0	0	24.162	0	0	0	0	0	0	0	0	0	0	0
	300	0.546	3.823	0.182	1300	0	0	0	29.34	0	0	0	0	0	0	0	0	0	0	0
	350	0.546	4.46	0.182	1300	0	0	0	34.714	0	0	0	0	0	0	0	0	0	0	0
	400	0.546	5.097	0.182	1300	0	0	0	40.25	0	0	0	0	0	0	0	0	0	0	0
	450	0.546	5.735	0.182	1300	0	0	0	45.951	0	0	0	0	0	0	0	0	0	0	0
	500	0.546	6.372	0.182	1300	0	0	0	51.869	0	0	0	0	0	0	0	0	0	0	0
	550	0.546	7.009	0.182	1300	0	0	0	57.895	0	0	0	0	0	0	0	0	0	0	0
	600	0.545	7.646	0.182	1300	0	0	0	64.071	0	0	0	0	0	0	0	0	0	0	0
	650	0.545	8.283	0.182	1300	0	0	0	70.404	0	0	0	0	0	0	0	0	0	0	0
	700	0.545	8.92	0.182	1300	0	0	0	76.695	0	0	0	0	0	0	0	0	0	0	0
	750	0.545	9.557	0.182	1300	0	0	0	83.009	0	0	0	0	0	0	0	0	0	0	0
	800	0.545	10.195	0.182	1300	0	0	0	89.173	0	0	0	0	0	0	0	0	0	0	0
	850	0.545	10.832	0.182	1300	0	0	0	95.035	0	0	0	0	0	0	0	0	0	0	0
	900	0.545	11.469	0.182	1300	0	0	0	100.05	0	0	0	0	0	0	0	0	0	0	0
	950	0.544	12.106	0.182	1300	0	0	0	104.19	0	0	0	0	0	0	0	0	0	0	0
	1000	0.544	12.743	0.182	1300	0	0	0	107.16	0	0	0	0	0	0	0	0	0	0	0
	1050	0.536	13.388	1.219	1300	0	0	0	110.69	0	0	0	0	0	0	0	0	0	0	0
	1100	0.528	14.034	1.219	1300	0	0	0	115.84	0	0	0	0	0	0	0	0	0	0	0
	1150	0.519	14.679	1.219	1300	0	0	0	120.69	0	0	0	0	0	0	0	0	0	0	0
	1200	0.511	15.325	1.219	1300	0	0	0	125.48	0	0	0	0	0	0	0	0	0	0	0
	1250	0.502	15.97	1.219	1300	0	0	0	130.04	0	0	0	0	0	0	0	0	0	0	0
	1300	0.494	16.615	1.219	1300	0	0	0	134.54	0	0	0	0	0	0	0	0	0	0	0
	1350	0.486	17.261	1.219	1300	0	0	0	138.75	0	0	0	0	0	0	0	0	0	0	0
	1400	0.477	17.906	1.219	1300	0	0	0	142.8	0	0	0	0	0	0	0	0	0	0	0
	1450	0.469	18.552	1.219	1300	0	0	0	146.7	0	0	0	0	0	0	0	0	0	0	0
	1500	0.46	19.197	1.219	1300	0	0	0	150.45	0	0	0	0	0	0	0	0	0	0	0
	1550	0.452	19.842	1.219	1300	0	0	0	154.1	0	0	0	0	0	0	0	0	0	0	0
	1600	0.444	20.488	1.219	1300	0	0	0	157.62	0	0	0	0	0	0	0	0	0	0	0
	1650	0.435	21.133	1.219	1300	0	0	0	161	0	0	0	0	0	0	0	0	0	0	0
	1700	0.427	21.779	1.219	1300	0	0	0	164.25	0	0	0	0	0	0	0	0	0	0	0
	1750	0.419	22.424	1.219	1300	0	0	0	167.37	0	0	0	0	0	0	0	0	0	0	0
	1800	0.41	23.069	1.219	1300	0	0	0	170.28	0	0	0	0	0	0	0	0	0	0	0
	1850	0.402	23.715	1.219	1300	0	0	0	173.08	0	0	0	0	0	0	0	0	0	0	0
	1900	0.393	24.36	1.219	1300	0	0	0	175.77	0	0	0	0	0	0	0	0	0	0	0
	1950	0.385	25.006	1.219	1300	0	0	0	178.36	0	0	0	0	0	0	0	0	0	0	0
	2000	0.377	25.651	1.219	1300	0	0	0	180.85	0	0	0	0	0	0	0	0	0	0	0
	2050	0.368	26.296	1.219	1300	1.612	0	0	183.25	0	0	0	0	0	0	0	0	0	0	0
	2100	0.36	26.942	1.219	1300	1.611	0	0	185.66	0	0	0	0	0	0	0	0	0	0	0
	2150	0.351	27.587	1.219	1300	1.61	0	0	187.99	0	0	0	0	0	0	0	0	0	0	0
	2200	0.343	28.233	1.219	1300	1.609	0	0	190.23	0	0	0	0	0	0	0	0	0	0	0
	2250	0.335	28.878	1.219	1299.99	1.608	0	0	192.31	0	0	0	0	0	0	0	0	0	0	0
	2300	0.326	29.523	1.219	1299.99	1.607	0	0	194.41	0	0	0	0	0	0	0	0	0	0	0
	2350	0.318	30.169	1.219	1299.98	1.606	0	0	196.53	0	0	0	0	0	0	0	0	0	0	0
	2400	0.309	30.814	1.219	1299.96	1.605	0	0	198.49	0	0	0	0	0	0	0	0	0	0	0
	2450	0.301	31.46	1.219	1299.92	1.605	0	0	200.3	0	0	0	0	0	0	0	0	0	0	0
	2500	0.293	32.105	1.219	1299.86	1.604	0	0	202.15	0	0	0	0	0	0	0	0	0	0	0
	2550	0.284	32.75	1.219	1299.76	1.603	0	0	204.02	0	0	0	0	0	0	0	0	0	0	0
	2600	0.276	33.395	1.219	1299.57	1.602	0	0	205.84	0	0	0	0	0	0	0	0	0	0	0
	2650	0.268	34.041	1.219	1299.27	1.601	0	0	207.61	0	0	0	0	0	0	0	0	0	0	0
	2700	0.259	34.685	1.218	1298.78	1.6	0	0	209.33	0	0	0	0	0	0	0	0	0	0	0
	2750	0.251	35.33	1.218	1297.99	1.599	0	0	211.01	0	0	0	0	0	0	0	0	0	0	0
	2800	0.242	35.974	1.218	1296.77	1.599	0	0	212.63	0	0	0	0	0	0	0	0	0	0	0
	2850	0.234	36.617	1.217	1294.9	1.598	0	0	214.21	0	0	0	0	0	0	0	0	0	0	0
	2900	0.226	37.26	1.216	1292.35	1.597	0	0	215.84	0	0	0	0	0	0	0	0	0	0	0
	2950	0.217	37.9	1.215	1288.7	1.596	0	0	217.34	0	0	0	0	0	0	0	0	0	0	0
	3000	0.209	38.539	1.213	1283.85	1.595	0	0	218.88	0	0	0	0	0	0	0	0	0	0	0
	3050	0.201	39.175	1.211	1277.63	1.594	0	0	220.55	0	0	0	0	0	0	0	0	0	0	0	0	0	0	0	0
	3100	0.193	39.807	1.208	1270.01	1.593	0	0.00327874	222.18	0.000505587	0.280882	0.561763	1.68529	2.24705	2.80882	0	0.00327874	0.00327874	0.00327874	0.00327874	0	0.00465182	0.00465182	0.00465182	0.00465182
	3150	0.184	40.436	1.204	1261.11	1.592	0	0.0298867	223.77	0.00050596	0.281089	0.562178	1.68653	2.24871	2.81089	0.097881	0.0687869	0.018271	0.0118378	0.00828851	26.257	0.0975935	0.0259225	0.0167953	0.0117596
	3200	0.176	41.059	1.2	1251.29	1.59	0.0426178	0.0298556	225.33	0.000506327	0.281293	0.562586	1.68776	2.25034	2.81293	0.097881	0.06874	0.0182517	0.0118245	0.0082787	26.44	0.0975269	0.0258952	0.0167763	0.0117457
	3250	0.168	41.678	1.196	1241.1	1.589	0.0874438	0.0298252	226.85	0.000506686	0.281492	0.562984	1.68895	2.25194	2.81492	0.0972252	0.0686942	0.018233	0.0118114	0.00826914	26.44	0.0974621	0.0258686	0.0167578	0.0117321
	3300	0.16	42.291	1.192	1231.27	1.588	0.09052	0.0297939	228.42	0.000507057	0.281698	0.563396	1.69019	2.25359	2.81698	0.0965569	0.0686469	0.0182135	0.0117979	0.00825926	26.44	0.0973949	0.025841	0.0167386	0.0117181
	3350	0.15	42.903	1.312	1222.62	1.737	0.0899138	0.0297631	229.96	0.000507421	0.281901	0.563802	1.6914	2.25521	2.81901	0.0959103	0.0686005	0.0181945	0.0117847	0.00824957	26.44	0.097329	0.025814	0.0167199	0.0117043
	3400	0.139	43.511	1.308	1215.87	1.735	0.0892694	0.0297299	231.62	0.000507816	0.28212	0.564239	1.69272	2.25696	2.8212	0.0952229	0.0685503	0.018174	0.0117704	0.00823912	26.44	0.0972579	0.0257849	0.0166996	0.0116895
	3450	0.128	44.116	1.306	1210.68	1.734	0.0886493	0.0296975	233.24	0.000508201	0.282334	0.564668	1.694	2.25867	2.82334	0.0945615	0.0685014	0.0181539	0.0117564	0.00822891	26.44	0.0971884	0.0257564	0.0166798	0.011675
	3500	0.117	44.719	1.303	1207.02	1.732	0.0874438	0.0296648	234.87	0.00050859	0.28255	0.5651	1.6953	2.2604	2.8255	0.0939053	0.068452	0.0181337	0.0117424	0.00821864	26.44	0.0971184	0.0257277	0.0166599	0.0116604
	3550	0.107	45.321	1.302	1204.46	1.73	0.0862612	0.0296325	236.48	0.000508974	0.282764	0.565527	1.69658	2.26211	2.82764	0.093266	0.0684032	0.0181137	0.0117285	0.00820849	26.44	0.0970492	0.0256994	0.0166402	0.011646
	3600	0.096	45.921	1.301	1202.85	1.729	0.0856429	0.0295998	238.11	0.000509365	0.282981	0.565961	1.69788	2.26384	2.82981	0.0926275	0.0683538	0.0180935	0.0117145	0.0081982	26.44	0.096979	0.0256707	0.0166203	0.0116315
	3650	0.085	46.521	1.3	1201.7	1.727	0.0862612	0.0295663	239.78	0.000509766	0.283203	0.566407	1.69922	2.26563	2.83203	0.0919824	0.068303	0.0180728	0.0117001	0.00818767	26.44	0.096907	0.0256413	0.0165999	0.0116165
	3700	0.075	47.12	1.299	1200.76	1.725	0.0868427	0.0295337	241.4	0.000510156	0.28342	0.56684	1.70052	2.26736	2.8342	0.0913651	0.0682537	0.0180527	0.0116861	0.00817744	26.44	0.0968371	0.0256128	0.01658	0.011602
	3750	0.064	47.719	1.298	1199.96	1.723	0.0874438	0.0295021	242.97	0.000510535	0.28363	0.567261	1.70178	2.26904	2.8363	0.0907747	0.0682059	0.0180331	0.0116726	0.00816752	26.44	0.0967693	0.0255851	0.0165608	0.0115879
	3800	0.047	48.323	1.567	1198.05	2.053	0.096	0.0294703	244.55	0.000510917	0.283843	0.567685	1.70306	2.27074	2.83843	0.0901882	0.0681578	0.0180135	0.0116589	0.00815754	26.44	0.081707	0.0215944	0.0139766	0.0097792
	3850	0.035	48.922	1.391	1197.93	1.836	0.0953489	0.0294366	246.22	0.000511321	0.284067	0.568135	1.7044	2.27254	2.84067	0.0897307	0.0681068	0.0179927	0.0116445	0.00814698	26.4855	0.0816459	0.0215695	0.0139593	0.00976654
	3900	0.023	49.52	1.39	1197.11	1.834	0.0946912	0.0294021	247.93	0.000511737	0.284298	0.568596	1.70579	2.27439	2.84298	0.0892843	0.0680545	0.0179714	0.0116297	0.00813617	26.5368	0.0815832	0.021544	0.0139416	0.00975358
	3950	0.012	50.118	1.39	1196.27	1.832	0.0940502	0.029368	249.62	0.000512148	0.284527	0.569054	1.70716	2.27621	2.84527	0.0888561	0.0680028	0.0179503	0.0116151	0.00812548	26.5895	0.0815212	0.0215187	0.0139241	0.00974076
	4000	0	50.791	1.339	1231.2	1.75	0.0571	0.029329	251.55	0.000512619	0.284789	0.569577	1.70873	2.27831	2.84789	0.0883816	0.0679436	0.0179263	0.0115984	0.00811326	26.652	0.0814503	0.0214899	0.0139041	0.00972612
																					476.241	1.67597	0.447188	0.291186
																			A1	0.0283756	0
																			A2	0.0239758	0.0985815
																					0.0985634
																					0.097881
																					0.0972252
																					0.0965569
																					0.0959103
																					0.0952229
																					0.0945615
																					0.0939053
																					0.093266
																					0.0926275
																					0.0919824
																					0.0913651
																					0.0907747
